# Supplementary material
Source: publisher site journal article supplement (https://www.dovepress.com/article/507660)
Supplement: Supplementary file 1 [file get_supplementary_file.php]

**Supplementary Material**

**Supplementary Figures**


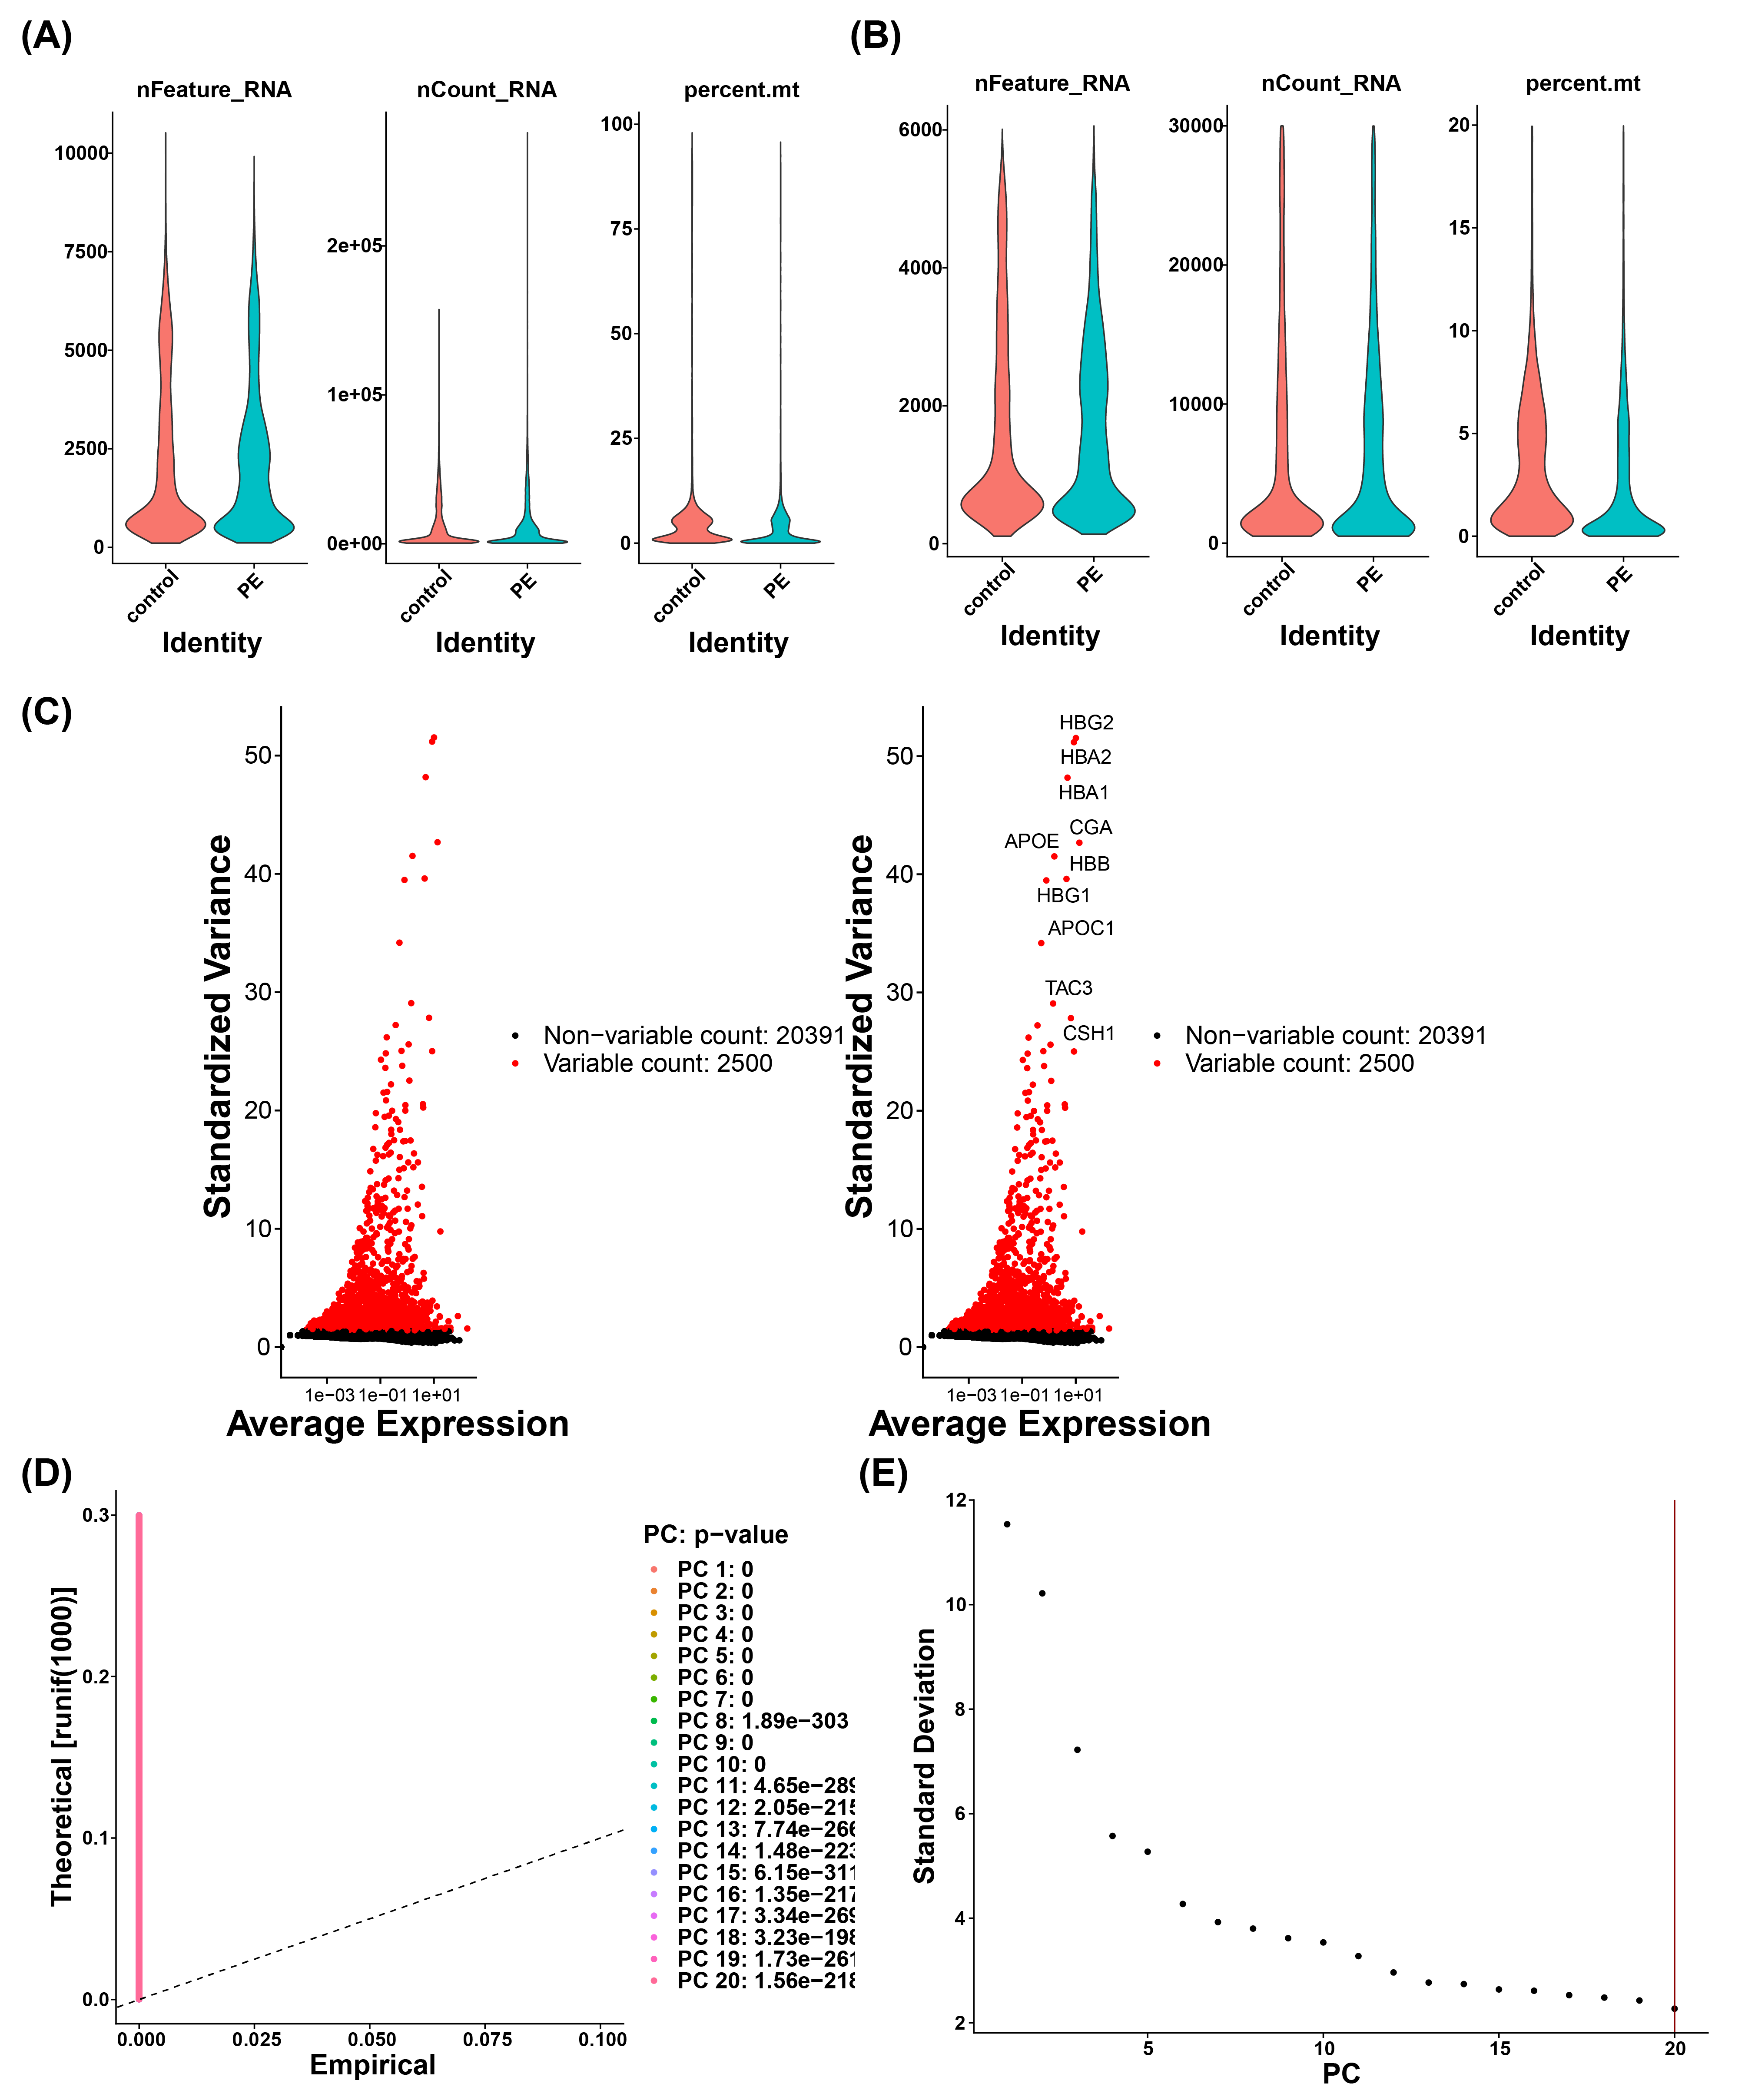


Figure S1. Single-cell data processing chart: (A) Distribution of nFeature_RNA, nCount_RNA and percent.mt before QC. (B) Distribution of nFeature_RNA, nCount_RNA and percent.mt after quality control. (C) Highly variable gene screening volcano map. (D) P value plot for PCs. (E) Optional dimensional gravel map.


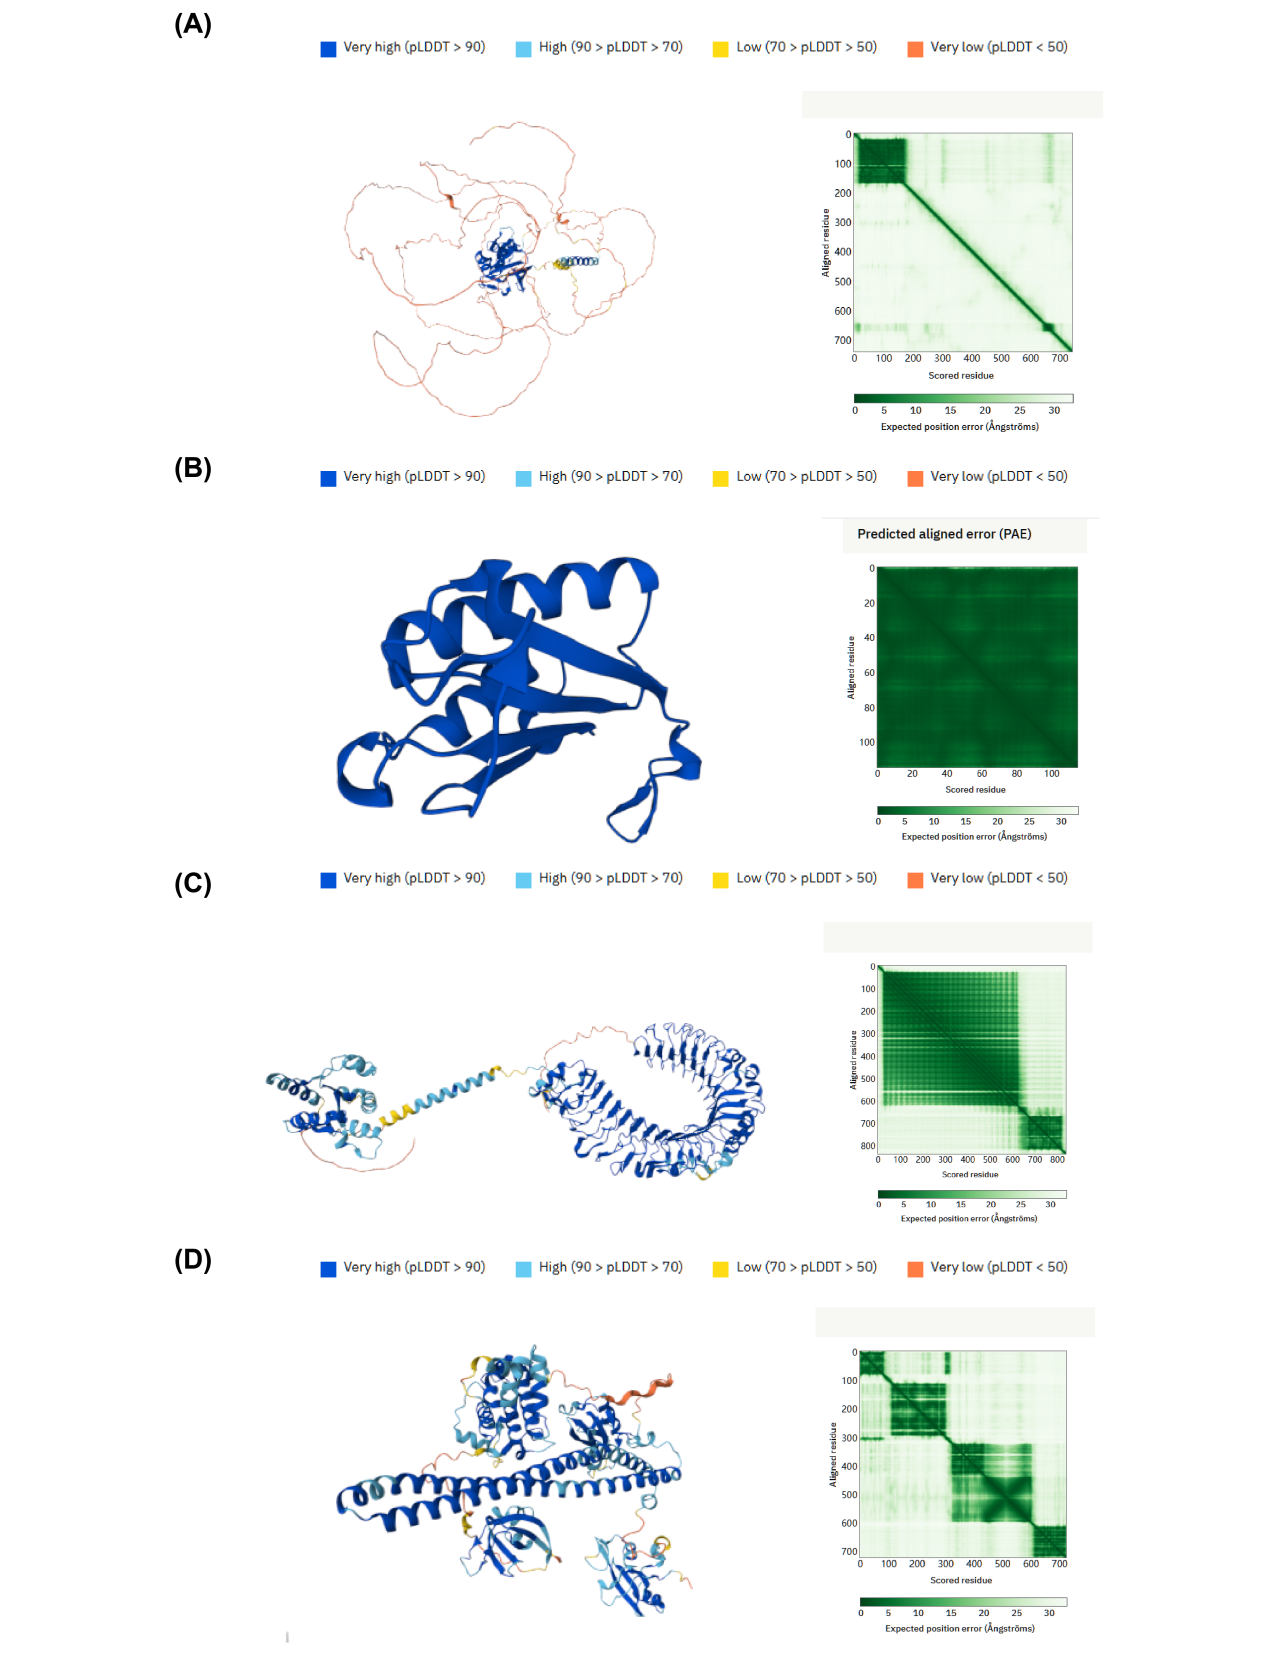
Figure S2. 3D Structures of Biomarkers. (A) MIF, (B) CD44, (C) PIK3R1, (D) TLR4 3D Model.


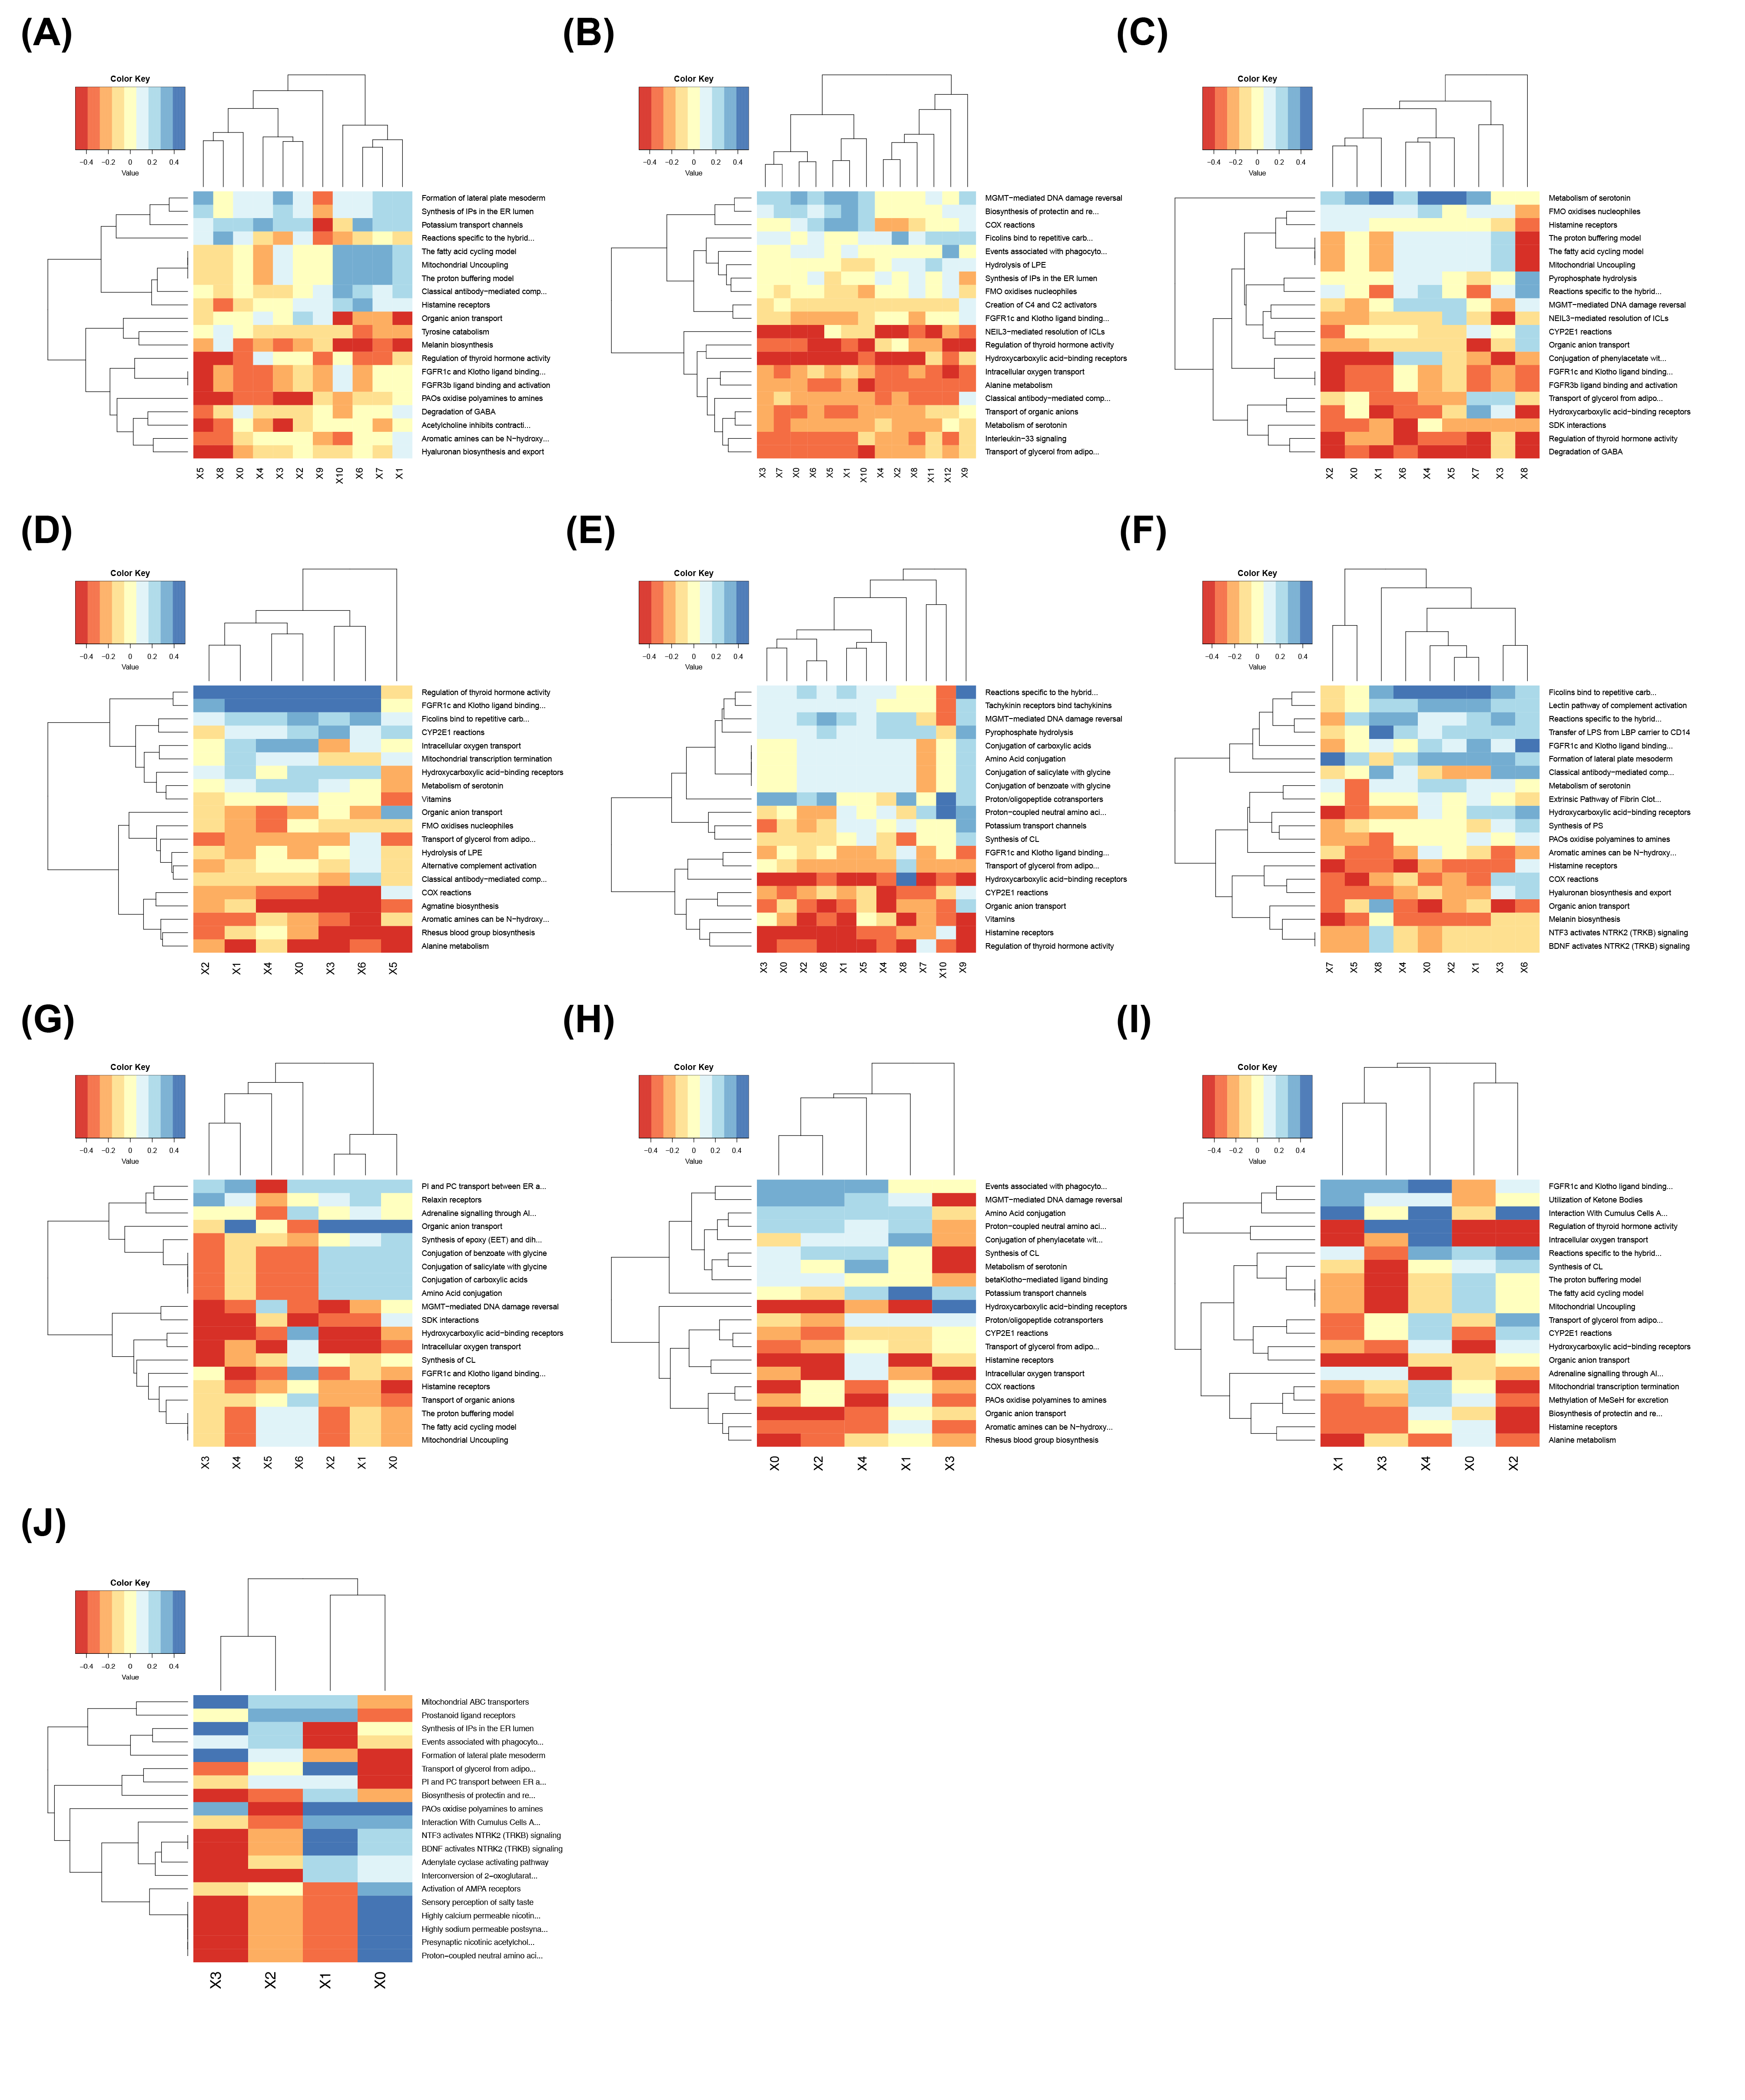


Figure S3. Differential Cell Function Enrichment Analysis. (A) Granulocytes heat. (B) VCT heat. (C) Myelocytes heat. (D) EVT heat. (E) NK cell.heat. (F) Monocytes heat. (G) SCT heat (H) CMP heat. (I) Endothelial cells heat. (J)Erythroblast heat.

Supplementary Tables

Table S1. The clinical information table of the GSE43942 dataset.

|  | title | geo_accession | status | submission_date | last_update_date | type | channel_count | source_name_ch1 | organism_ch1 | characteristics_ch1 | treatment_protocol_ch1 | molecule_ch1 | extract_protocol_ch1 | label_ch1 | label_protocol_ch1 | taxid_ch1 | hyb_protocol | scan_protocol | description | data_processing | platform_id | contact_name | contact_email | contact_institute | contact_address | contact_city | contact_state | contact_zip/postal_code | contact_country | supplementary_file | data_row_count | relation | phenotype:ch1 |
| --- | --- | --- | --- | --- | --- | --- | --- | --- | --- | --- | --- | --- | --- | --- | --- | --- | --- | --- | --- | --- | --- | --- | --- | --- | --- | --- | --- | --- | --- | --- | --- | --- | --- |
| GSM1074803 | Placenta_Control_C1 | GSM1074803 | Public on Feb 01 2013 | Jan 31 2013 | Nov 13 2015 | RNA | 1 | normal term placentas | Homo sapiens | phenotype: normal | All clinical placentas from normal and pathological pregnancies were collected immediately after the caesarean section. Two ~ 1 cm3 fragments were dissected from the placenta, after removal of maternal blood by vigorous washing in phosphate buffered saline (PBS). The tissues were maintained in RNAlater | total RNA | Total RNAs were extracted from placentas using the mirVana™ miRNA Isolation Kit (Ambion) according to manufacturer’s instruction, including a DNase digestion step. | cy3 | The samples were labeled using a NimbleGen One-Color DNA Labeling Kit following their standard operating protocol.See www.nimblegen.com. | 9606 | All samples were hybridized in NimbleGen Hybridization System following their standard operating protocol. See www.nimblegen.com. | The processed slides were scanned with the Axon GenePix 4000B microarray scanner according to the standard operating protocal.See www.nimblegen.com. | The sample is from normal pregnancies by caesarean section | Raw data were extracted as pair files by NimbleScan software (version 2.5), and Robust multi-array average (RMA) method was used to offer quantile normalization and background correction. | GPL10191 | qian,Yu,Xiang | xiangqianfd@gmail.com | Fudan University | Yixuanyuan road NO.138 | Shanghai | Shanghai | 200032 | China | ftp://ftp.ncbi.nlm.nih.gov/geo/samples/GSM1074nnn/GSM1074803/suppl/GSM1074803_C1_532.pair.gz | 45033 | Reanalyzed by: GSE75010 | normal |
| GSM1074804 | Placenta_Control_C2 | GSM1074804 | Public on Feb 01 2013 | Jan 31 2013 | Nov 13 2015 | RNA | 1 | normal term placentas | Homo sapiens | phenotype: normal | All clinical placentas from normal and pathological pregnancies were collected immediately after the caesarean section. Two ~ 1 cm3 fragments were dissected from the placenta, after removal of maternal blood by vigorous washing in phosphate buffered saline (PBS). The tissues were maintained in RNAlater | total RNA | Total RNAs were extracted from placentas using the mirVana™ miRNA Isolation Kit (Ambion) according to manufacturer’s instruction, including a DNase digestion step. | cy3 | The samples were labeled using a NimbleGen One-Color DNA Labeling Kit following their standard operating protocol.See www.nimblegen.com. | 9606 | All samples were hybridized in NimbleGen Hybridization System following their standard operating protocol. See www.nimblegen.com. | The processed slides were scanned with the Axon GenePix 4000B microarray scanner according to the standard operating protocal.See www.nimblegen.com. | The sample is from normal pregnancies by caesarean section | Raw data were extracted as pair files by NimbleScan software (version 2.5), and Robust multi-array average (RMA) method was used to offer quantile normalization and background correction. | GPL10191 | qian,Yu,Xiang | xiangqianfd@gmail.com | Fudan University | Yixuanyuan road NO.138 | Shanghai | Shanghai | 200032 | China | ftp://ftp.ncbi.nlm.nih.gov/geo/samples/GSM1074nnn/GSM1074804/suppl/GSM1074804_C2_532.pair.gz | 45033 | Reanalyzed by: GSE75010 | normal |
| GSM1074805 | Placenta_Control_C3 | GSM1074805 | Public on Feb 01 2013 | Jan 31 2013 | Nov 13 2015 | RNA | 1 | normal term placentas | Homo sapiens | phenotype: normal | All clinical placentas from normal and pathological pregnancies were collected immediately after the caesarean section. Two ~ 1 cm3 fragments were dissected from the placenta, after removal of maternal blood by vigorous washing in phosphate buffered saline (PBS). The tissues were maintained in RNAlater | total RNA | Total RNAs were extracted from placentas using the mirVana™ miRNA Isolation Kit (Ambion) according to manufacturer’s instruction, including a DNase digestion step. | cy3 | The samples were labeled using a NimbleGen One-Color DNA Labeling Kit following their standard operating protocol.See www.nimblegen.com. | 9606 | All samples were hybridized in NimbleGen Hybridization System following their standard operating protocol. See www.nimblegen.com. | The processed slides were scanned with the Axon GenePix 4000B microarray scanner according to the standard operating protocal.See www.nimblegen.com. | The sample is from normal pregnancies by caesarean section | Raw data were extracted as pair files by NimbleScan software (version 2.5), and Robust multi-array average (RMA) method was used to offer quantile normalization and background correction. | GPL10191 | qian,Yu,Xiang | xiangqianfd@gmail.com | Fudan University | Yixuanyuan road NO.138 | Shanghai | Shanghai | 200032 | China | ftp://ftp.ncbi.nlm.nih.gov/geo/samples/GSM1074nnn/GSM1074805/suppl/GSM1074805_C3_532.pair.gz | 45033 | Reanalyzed by: GSE75010 | normal |
| GSM1074806 | Placenta_Control_C4 | GSM1074806 | Public on Feb 01 2013 | Jan 31 2013 | Nov 13 2015 | RNA | 1 | normal term placentas | Homo sapiens | phenotype: normal | All clinical placentas from normal and pathological pregnancies were collected immediately after the caesarean section. Two ~ 1 cm3 fragments were dissected from the placenta, after removal of maternal blood by vigorous washing in phosphate buffered saline (PBS). The tissues were maintained in RNAlater | total RNA | Total RNAs were extracted from placentas using the mirVana™ miRNA Isolation Kit (Ambion) according to manufacturer’s instruction, including a DNase digestion step. | cy3 | The samples were labeled using a NimbleGen One-Color DNA Labeling Kit following their standard operating protocol.See www.nimblegen.com. | 9606 | All samples were hybridized in NimbleGen Hybridization System following their standard operating protocol. See www.nimblegen.com. | The processed slides were scanned with the Axon GenePix 4000B microarray scanner according to the standard operating protocal.See www.nimblegen.com. | The sample is from normal pregnancies by caesarean section | Raw data were extracted as pair files by NimbleScan software (version 2.5), and Robust multi-array average (RMA) method was used to offer quantile normalization and background correction. | GPL10191 | qian,Yu,Xiang | xiangqianfd@gmail.com | Fudan University | Yixuanyuan road NO.138 | Shanghai | Shanghai | 200032 | China | ftp://ftp.ncbi.nlm.nih.gov/geo/samples/GSM1074nnn/GSM1074806/suppl/GSM1074806_C4_532.pair.gz | 45033 | Reanalyzed by: GSE75010 | normal |
| GSM1074807 | Placenta_Control_C5 | GSM1074807 | Public on Feb 01 2013 | Jan 31 2013 | Nov 13 2015 | RNA | 1 | normal term placentas | Homo sapiens | phenotype: normal | All clinical placentas from normal and pathological pregnancies were collected immediately after the caesarean section. Two ~ 1 cm3 fragments were dissected from the placenta, after removal of maternal blood by vigorous washing in phosphate buffered saline (PBS). The tissues were maintained in RNAlater | total RNA | Total RNAs were extracted from placentas using the mirVana™ miRNA Isolation Kit (Ambion) according to manufacturer’s instruction, including a DNase digestion step. | cy3 | The samples were labeled using a NimbleGen One-Color DNA Labeling Kit following their standard operating protocol.See www.nimblegen.com. | 9606 | All samples were hybridized in NimbleGen Hybridization System following their standard operating protocol. See www.nimblegen.com. | The processed slides were scanned with the Axon GenePix 4000B microarray scanner according to the standard operating protocal.See www.nimblegen.com. | The sample is from normal pregnancies by caesarean section | Raw data were extracted as pair files by NimbleScan software (version 2.5), and Robust multi-array average (RMA) method was used to offer quantile normalization and background correction. | GPL10191 | qian,Yu,Xiang | xiangqianfd@gmail.com | Fudan University | Yixuanyuan road NO.138 | Shanghai | Shanghai | 200032 | China | ftp://ftp.ncbi.nlm.nih.gov/geo/samples/GSM1074nnn/GSM1074807/suppl/GSM1074807_C5_532.pair.gz | 45033 | Reanalyzed by: GSE75010 | normal |
| GSM1074808 | Placenta_Control_C6 | GSM1074808 | Public on Feb 01 2013 | Jan 31 2013 | Nov 13 2015 | RNA | 1 | normal term placentas | Homo sapiens | phenotype: normal | All clinical placentas from normal and pathological pregnancies were collected immediately after the caesarean section. Two ~ 1 cm3 fragments were dissected from the placenta, after removal of maternal blood by vigorous washing in phosphate buffered saline (PBS). The tissues were maintained in RNAlater | total RNA | Total RNAs were extracted from placentas using the mirVana™ miRNA Isolation Kit (Ambion) according to manufacturer’s instruction, including a DNase digestion step. | cy3 | The samples were labeled using a NimbleGen One-Color DNA Labeling Kit following their standard operating protocol.See www.nimblegen.com. | 9606 | All samples were hybridized in NimbleGen Hybridization System following their standard operating protocol. See www.nimblegen.com. | The processed slides were scanned with the Axon GenePix 4000B microarray scanner according to the standard operating protocal.See www.nimblegen.com. | The sample is from normal pregnancies by caesarean section | Raw data were extracted as pair files by NimbleScan software (version 2.5), and Robust multi-array average (RMA) method was used to offer quantile normalization and background correction. | GPL10191 | qian,Yu,Xiang | xiangqianfd@gmail.com | Fudan University | Yixuanyuan road NO.138 | Shanghai | Shanghai | 200032 | China | ftp://ftp.ncbi.nlm.nih.gov/geo/samples/GSM1074nnn/GSM1074808/suppl/GSM1074808_C6_532.pair.gz | 45033 | Reanalyzed by: GSE75010 | normal |
| GSM1074809 | Placenta_Control_C7 | GSM1074809 | Public on Feb 01 2013 | Jan 31 2013 | Nov 13 2015 | RNA | 1 | normal term placentas | Homo sapiens | phenotype: normal | All clinical placentas from normal and pathological pregnancies were collected immediately after the caesarean section. Two ~ 1 cm3 fragments were dissected from the placenta, after removal of maternal blood by vigorous washing in phosphate buffered saline (PBS). The tissues were maintained in RNAlater | total RNA | Total RNAs were extracted from placentas using the mirVana™ miRNA Isolation Kit (Ambion) according to manufacturer’s instruction, including a DNase digestion step. | cy3 | The samples were labeled using a NimbleGen One-Color DNA Labeling Kit following their standard operating protocol.See www.nimblegen.com. | 9606 | All samples were hybridized in NimbleGen Hybridization System following their standard operating protocol. See www.nimblegen.com. | The processed slides were scanned with the Axon GenePix 4000B microarray scanner according to the standard operating protocal.See www.nimblegen.com. | The sample is from normal pregnancies by caesarean section | Raw data were extracted as pair files by NimbleScan software (version 2.5), and Robust multi-array average (RMA) method was used to offer quantile normalization and background correction. | GPL10191 | qian,Yu,Xiang | xiangqianfd@gmail.com | Fudan University | Yixuanyuan road NO.138 | Shanghai | Shanghai | 200032 | China | ftp://ftp.ncbi.nlm.nih.gov/geo/samples/GSM1074nnn/GSM1074809/suppl/GSM1074809_C7_532.pair.gz | 45033 | Reanalyzed by: GSE75010 | normal |
| GSM1074810 | Placenta_PE_P1 | GSM1074810 | Public on Feb 01 2013 | Jan 31 2013 | Nov 13 2015 | RNA | 1 | preeclamptic term placentas | Homo sapiens | phenotype: preeclampsia | All clinical placentas from normal and pathological pregnancies were collected immediately after the caesarean section. Two ~ 1 cm3 fragments were dissected from the placenta, after removal of maternal blood by vigorous washing in phosphate buffered saline (PBS). The tissues were maintained in RNAlater | total RNA | Total RNAs were extracted from placentas using the mirVana™ miRNA Isolation Kit (Ambion) according to manufacturer’s instruction, including a DNase digestion step. | cy3 | The samples were labeled using a NimbleGen One-Color DNA Labeling Kit following their standard operating protocol.See www.nimblegen.com. | 9606 | All samples were hybridized in NimbleGen Hybridization System following their standard operating protocol. See www.nimblegen.com. | The processed slides were scanned with the Axon GenePix 4000B microarray scanner according to the standard operating protocal.See www.nimblegen.com. | The sample is from preeclamptic pregnancies by caesarean section | Raw data were extracted as pair files by NimbleScan software (version 2.5), and Robust multi-array average (RMA) method was used to offer quantile normalization and background correction. | GPL10191 | qian,Yu,Xiang | xiangqianfd@gmail.com | Fudan University | Yixuanyuan road NO.138 | Shanghai | Shanghai | 200032 | China | ftp://ftp.ncbi.nlm.nih.gov/geo/samples/GSM1074nnn/GSM1074810/suppl/GSM1074810_P1_532.pair.gz | 45033 | Reanalyzed by: GSE75010 | preeclampsia |
| GSM1074811 | Placenta_PE_P2 | GSM1074811 | Public on Feb 01 2013 | Jan 31 2013 | Nov 13 2015 | RNA | 1 | preeclamptic term placentas | Homo sapiens | phenotype: preeclampsia | All clinical placentas from normal and pathological pregnancies were collected immediately after the caesarean section. Two ~ 1 cm3 fragments were dissected from the placenta, after removal of maternal blood by vigorous washing in phosphate buffered saline (PBS). The tissues were maintained in RNAlater | total RNA | Total RNAs were extracted from placentas using the mirVana™ miRNA Isolation Kit (Ambion) according to manufacturer’s instruction, including a DNase digestion step. | cy3 | The samples were labeled using a NimbleGen One-Color DNA Labeling Kit following their standard operating protocol.See www.nimblegen.com. | 9606 | All samples were hybridized in NimbleGen Hybridization System following their standard operating protocol. See www.nimblegen.com. | The processed slides were scanned with the Axon GenePix 4000B microarray scanner according to the standard operating protocal.See www.nimblegen.com. | The sample is from preeclamptic pregnancies by caesarean section | Raw data were extracted as pair files by NimbleScan software (version 2.5), and Robust multi-array average (RMA) method was used to offer quantile normalization and background correction. | GPL10191 | qian,Yu,Xiang | xiangqianfd@gmail.com | Fudan University | Yixuanyuan road NO.138 | Shanghai | Shanghai | 200032 | China | ftp://ftp.ncbi.nlm.nih.gov/geo/samples/GSM1074nnn/GSM1074811/suppl/GSM1074811_P2_532.pair.gz | 45033 | Reanalyzed by: GSE75010 | preeclampsia |
| GSM1074812 | Placenta_PE_P3 | GSM1074812 | Public on Feb 01 2013 | Jan 31 2013 | Nov 13 2015 | RNA | 1 | preeclamptic term placentas | Homo sapiens | phenotype: preeclampsia | All clinical placentas from normal and pathological pregnancies were collected immediately after the caesarean section. Two ~ 1 cm3 fragments were dissected from the placenta, after removal of maternal blood by vigorous washing in phosphate buffered saline (PBS). The tissues were maintained in RNAlater | total RNA | Total RNAs were extracted from placentas using the mirVana™ miRNA Isolation Kit (Ambion) according to manufacturer’s instruction, including a DNase digestion step. | cy3 | The samples were labeled using a NimbleGen One-Color DNA Labeling Kit following their standard operating protocol.See www.nimblegen.com. | 9606 | All samples were hybridized in NimbleGen Hybridization System following their standard operating protocol. See www.nimblegen.com. | The processed slides were scanned with the Axon GenePix 4000B microarray scanner according to the standard operating protocal.See www.nimblegen.com. | The sample is from preeclamptic pregnancies by caesarean section | Raw data were extracted as pair files by NimbleScan software (version 2.5), and Robust multi-array average (RMA) method was used to offer quantile normalization and background correction. | GPL10191 | qian,Yu,Xiang | xiangqianfd@gmail.com | Fudan University | Yixuanyuan road NO.138 | Shanghai | Shanghai | 200032 | China | ftp://ftp.ncbi.nlm.nih.gov/geo/samples/GSM1074nnn/GSM1074812/suppl/GSM1074812_P3_532.pair.gz | 45033 | Reanalyzed by: GSE75010 | preeclampsia |
| GSM1074813 | Placenta_PE_P4 | GSM1074813 | Public on Feb 01 2013 | Jan 31 2013 | Nov 13 2015 | RNA | 1 | preeclamptic term placentas | Homo sapiens | phenotype: preeclampsia | All clinical placentas from normal and pathological pregnancies were collected immediately after the caesarean section. Two ~ 1 cm3 fragments were dissected from the placenta, after removal of maternal blood by vigorous washing in phosphate buffered saline (PBS). The tissues were maintained in RNAlater | total RNA | Total RNAs were extracted from placentas using the mirVana™ miRNA Isolation Kit (Ambion) according to manufacturer’s instruction, including a DNase digestion step. | cy3 | The samples were labeled using a NimbleGen One-Color DNA Labeling Kit following their standard operating protocol.See www.nimblegen.com. | 9606 | All samples were hybridized in NimbleGen Hybridization System following their standard operating protocol. See www.nimblegen.com. | The processed slides were scanned with the Axon GenePix 4000B microarray scanner according to the standard operating protocal.See www.nimblegen.com. | The sample is from preeclamptic pregnancies by caesarean section | Raw data were extracted as pair files by NimbleScan software (version 2.5), and Robust multi-array average (RMA) method was used to offer quantile normalization and background correction. | GPL10191 | qian,Yu,Xiang | xiangqianfd@gmail.com | Fudan University | Yixuanyuan road NO.138 | Shanghai | Shanghai | 200032 | China | ftp://ftp.ncbi.nlm.nih.gov/geo/samples/GSM1074nnn/GSM1074813/suppl/GSM1074813_P4_532.pair.gz | 45033 | Reanalyzed by: GSE75010 | preeclampsia |
| GSM1074814 | Placenta_PE_P6 | GSM1074814 | Public on Feb 01 2013 | Jan 31 2013 | Nov 13 2015 | RNA | 1 | preeclamptic term placentas | Homo sapiens | phenotype: preeclampsia | All clinical placentas from normal and pathological pregnancies were collected immediately after the caesarean section. Two ~ 1 cm3 fragments were dissected from the placenta, after removal of maternal blood by vigorous washing in phosphate buffered saline (PBS). The tissues were maintained in RNAlater | total RNA | Total RNAs were extracted from placentas using the mirVana™ miRNA Isolation Kit (Ambion) according to manufacturer’s instruction, including a DNase digestion step. | cy3 | The samples were labeled using a NimbleGen One-Color DNA Labeling Kit following their standard operating protocol.See www.nimblegen.com. | 9606 | All samples were hybridized in NimbleGen Hybridization System following their standard operating protocol. See www.nimblegen.com. | The processed slides were scanned with the Axon GenePix 4000B microarray scanner according to the standard operating protocal.See www.nimblegen.com. | The sample is from preeclamptic pregnancies by caesarean section | Raw data were extracted as pair files by NimbleScan software (version 2.5), and Robust multi-array average (RMA) method was used to offer quantile normalization and background correction. | GPL10191 | qian,Yu,Xiang | xiangqianfd@gmail.com | Fudan University | Yixuanyuan road NO.138 | Shanghai | Shanghai | 200032 | China | ftp://ftp.ncbi.nlm.nih.gov/geo/samples/GSM1074nnn/GSM1074814/suppl/GSM1074814_P6_532.pair.gz | 45033 | Reanalyzed by: GSE75010 | preeclampsia |

Table S2. The clinical information table of the GSE25906 dataset.

|  | title | geo_accession | status | submission_date | last_update_date | type | channel_count | source_name_ch1 | organism_ch1 | characteristics_ch1 | characteristics_ch1.1 | characteristics_ch1.2 | characteristics_ch1.3 | characteristics_ch1.4 | characteristics_ch1.5 | molecule_ch1 | extract_protocol_ch1 | label_ch1 | label_protocol_ch1 | taxid_ch1 | hyb_protocol | scan_protocol | data_processing | platform_id | contact_name | contact_institute | contact_address | contact_city | contact_state | contact_zip/postal_code | contact_country | supplementary_file | data_row_count | relation | batch:ch1 | classification:ch1 | gender:ch1 | gestational age:ch1 | induction of labor:ch1 | tissue:ch1 |
| --- | --- | --- | --- | --- | --- | --- | --- | --- | --- | --- | --- | --- | --- | --- | --- | --- | --- | --- | --- | --- | --- | --- | --- | --- | --- | --- | --- | --- | --- | --- | --- | --- | --- | --- | --- | --- | --- | --- | --- | --- |
| GSM635904 | human.placenta.006 | GSM635904 | Public on Dec 10 2010 | Dec 07 2010 | Nov 13 2015 | RNA | 1 | human placenta | Homo sapiens | tissue: placenta | gender: F | classification: preeclamptic | gestational age: 36 | induction of labor: spontaneous | batch: A | total RNA | Total RNA was isolated from term human placenta using the Totally RNA kit (Ambion) following the manufacturer’s instructions with slight modifications. Briefly, homogenized tissue chilled in liquid nitrogen was lysed in 10 volumes of denaturation solution (200 mg tissue, 2 ml denaturation solution). The lysed sample was pre-cleared of bulk genomic DNA and cellular debris by spinning at 4,000 x g for 5 minutes. The supernatant was sequentially extracted with equal volumes phenol:chloroform, and acid phenol:chloroform (pH 4.5) using phase divider gels (Sigma), then precipitated with an equal volume of 100% isopropanol. The pellet was washed twice with 70% ethanol and resuspended in elution buffer (1 mM Tris-Cl). Total RNA was treated with Turbo DNA-free to remove traces of genomic DNA contamination (Ambion). RNA integrity was assessed using a Bioanalyzer (Agilent Biotechnologies) and only samples with a RIN > 7 were used. | biotin | Labeling for Illumina Human6-v2 BeadArrays was performed according to manufacturer’s instructions. Briefly, the Illumina TotalPrep RNA Amplification Kit (Applied Biosystems, Foster City, CA) was used for a first and second strand reverse transcription step from 500 ng of total RNA. This was followed by an overnight in vitro transcription reaction that incorporates biotin-labeled nucleotides. 1.5 ug of biotin-labeled cRNA was mixed with an Illumina-supplied hybridization buffer containing several control oligonucleotides. | 9606 | Hybridization for Illumina Human6-v2 BeadArrays was performed according to manufacturer’s instructions. Labeled cRNA was hybridized to BeadArrays at 58°C for 18 hr. Washing, blocking, and streptavadin-Cy3 staining was performed out following manufacturer’s protocol. | BeadChips were scanned on the BeadArray Reader and scanned images were analyzed using BeadStudio software. | Transcript data was log2 transformed, and quantile normalized. | GPL6102 | Shengdar,,Tsai | North Carolina State University | 4700 Hillsborough St. | Raleigh | NC | 27604 | USA | NONE | 48701 | Reanalyzed by: GSE75010 | A | preeclamptic | F | 36 | spontaneous | placenta |
| GSM635905 | human.placenta.008 | GSM635905 | Public on Dec 10 2010 | Dec 07 2010 | Nov 13 2015 | RNA | 1 | human placenta | Homo sapiens | tissue: placenta | gender: F | classification: preeclamptic | gestational age: 37 | induction of labor: induced | batch: A | total RNA | Total RNA was isolated from term human placenta using the Totally RNA kit (Ambion) following the manufacturer’s instructions with slight modifications. Briefly, homogenized tissue chilled in liquid nitrogen was lysed in 10 volumes of denaturation solution (200 mg tissue, 2 ml denaturation solution). The lysed sample was pre-cleared of bulk genomic DNA and cellular debris by spinning at 4,000 x g for 5 minutes. The supernatant was sequentially extracted with equal volumes phenol:chloroform, and acid phenol:chloroform (pH 4.5) using phase divider gels (Sigma), then precipitated with an equal volume of 100% isopropanol. The pellet was washed twice with 70% ethanol and resuspended in elution buffer (1 mM Tris-Cl). Total RNA was treated with Turbo DNA-free to remove traces of genomic DNA contamination (Ambion). RNA integrity was assessed using a Bioanalyzer (Agilent Biotechnologies) and only samples with a RIN > 7 were used. | biotin | Labeling for Illumina Human6-v2 BeadArrays was performed according to manufacturer’s instructions. Briefly, the Illumina TotalPrep RNA Amplification Kit (Applied Biosystems, Foster City, CA) was used for a first and second strand reverse transcription step from 500 ng of total RNA. This was followed by an overnight in vitro transcription reaction that incorporates biotin-labeled nucleotides. 1.5 ug of biotin-labeled cRNA was mixed with an Illumina-supplied hybridization buffer containing several control oligonucleotides. | 9606 | Hybridization for Illumina Human6-v2 BeadArrays was performed according to manufacturer’s instructions. Labeled cRNA was hybridized to BeadArrays at 58°C for 18 hr. Washing, blocking, and streptavadin-Cy3 staining was performed out following manufacturer’s protocol. | BeadChips were scanned on the BeadArray Reader and scanned images were analyzed using BeadStudio software. | Transcript data was log2 transformed, and quantile normalized. | GPL6102 | Shengdar,,Tsai | North Carolina State University | 4700 Hillsborough St. | Raleigh | NC | 27604 | USA | NONE | 48701 | Reanalyzed by: GSE75010 | A | preeclamptic | F | 37 | induced | placenta |
| GSM635906 | human.placenta.012 | GSM635906 | Public on Dec 10 2010 | Dec 07 2010 | Nov 13 2015 | RNA | 1 | human placenta | Homo sapiens | tissue: placenta | gender: M | classification: preeclamptic | gestational age: 37 | induction of labor: induced | batch: A | total RNA | Total RNA was isolated from term human placenta using the Totally RNA kit (Ambion) following the manufacturer’s instructions with slight modifications. Briefly, homogenized tissue chilled in liquid nitrogen was lysed in 10 volumes of denaturation solution (200 mg tissue, 2 ml denaturation solution). The lysed sample was pre-cleared of bulk genomic DNA and cellular debris by spinning at 4,000 x g for 5 minutes. The supernatant was sequentially extracted with equal volumes phenol:chloroform, and acid phenol:chloroform (pH 4.5) using phase divider gels (Sigma), then precipitated with an equal volume of 100% isopropanol. The pellet was washed twice with 70% ethanol and resuspended in elution buffer (1 mM Tris-Cl). Total RNA was treated with Turbo DNA-free to remove traces of genomic DNA contamination (Ambion). RNA integrity was assessed using a Bioanalyzer (Agilent Biotechnologies) and only samples with a RIN > 7 were used. | biotin | Labeling for Illumina Human6-v2 BeadArrays was performed according to manufacturer’s instructions. Briefly, the Illumina TotalPrep RNA Amplification Kit (Applied Biosystems, Foster City, CA) was used for a first and second strand reverse transcription step from 500 ng of total RNA. This was followed by an overnight in vitro transcription reaction that incorporates biotin-labeled nucleotides. 1.5 ug of biotin-labeled cRNA was mixed with an Illumina-supplied hybridization buffer containing several control oligonucleotides. | 9606 | Hybridization for Illumina Human6-v2 BeadArrays was performed according to manufacturer’s instructions. Labeled cRNA was hybridized to BeadArrays at 58°C for 18 hr. Washing, blocking, and streptavadin-Cy3 staining was performed out following manufacturer’s protocol. | BeadChips were scanned on the BeadArray Reader and scanned images were analyzed using BeadStudio software. | Transcript data was log2 transformed, and quantile normalized. | GPL6102 | Shengdar,,Tsai | North Carolina State University | 4700 Hillsborough St. | Raleigh | NC | 27604 | USA | NONE | 48701 | Reanalyzed by: GSE75010 | A | preeclamptic | M | 37 | induced | placenta |
| GSM635907 | human.placenta.013 | GSM635907 | Public on Dec 10 2010 | Dec 07 2010 | Nov 13 2015 | RNA | 1 | human placenta | Homo sapiens | tissue: placenta | gender: M | classification: preeclamptic | gestational age: 34 | induction of labor: induced | batch: A | total RNA | Total RNA was isolated from term human placenta using the Totally RNA kit (Ambion) following the manufacturer’s instructions with slight modifications. Briefly, homogenized tissue chilled in liquid nitrogen was lysed in 10 volumes of denaturation solution (200 mg tissue, 2 ml denaturation solution). The lysed sample was pre-cleared of bulk genomic DNA and cellular debris by spinning at 4,000 x g for 5 minutes. The supernatant was sequentially extracted with equal volumes phenol:chloroform, and acid phenol:chloroform (pH 4.5) using phase divider gels (Sigma), then precipitated with an equal volume of 100% isopropanol. The pellet was washed twice with 70% ethanol and resuspended in elution buffer (1 mM Tris-Cl). Total RNA was treated with Turbo DNA-free to remove traces of genomic DNA contamination (Ambion). RNA integrity was assessed using a Bioanalyzer (Agilent Biotechnologies) and only samples with a RIN > 7 were used. | biotin | Labeling for Illumina Human6-v2 BeadArrays was performed according to manufacturer’s instructions. Briefly, the Illumina TotalPrep RNA Amplification Kit (Applied Biosystems, Foster City, CA) was used for a first and second strand reverse transcription step from 500 ng of total RNA. This was followed by an overnight in vitro transcription reaction that incorporates biotin-labeled nucleotides. 1.5 ug of biotin-labeled cRNA was mixed with an Illumina-supplied hybridization buffer containing several control oligonucleotides. | 9606 | Hybridization for Illumina Human6-v2 BeadArrays was performed according to manufacturer’s instructions. Labeled cRNA was hybridized to BeadArrays at 58°C for 18 hr. Washing, blocking, and streptavadin-Cy3 staining was performed out following manufacturer’s protocol. | BeadChips were scanned on the BeadArray Reader and scanned images were analyzed using BeadStudio software. | Transcript data was log2 transformed, and quantile normalized. | GPL6102 | Shengdar,,Tsai | North Carolina State University | 4700 Hillsborough St. | Raleigh | NC | 27604 | USA | NONE | 48701 | Reanalyzed by: GSE75010 | A | preeclamptic | M | 34 | induced | placenta |
| GSM635908 | human.placenta.017 | GSM635908 | Public on Dec 10 2010 | Dec 07 2010 | Nov 13 2015 | RNA | 1 | human placenta | Homo sapiens | tissue: placenta | gender: M | classification: preeclamptic | gestational age: 38 | induction of labor: induced | batch: B | total RNA | Total RNA was isolated from term human placenta using the Totally RNA kit (Ambion) following the manufacturer’s instructions with slight modifications. Briefly, homogenized tissue chilled in liquid nitrogen was lysed in 10 volumes of denaturation solution (200 mg tissue, 2 ml denaturation solution). The lysed sample was pre-cleared of bulk genomic DNA and cellular debris by spinning at 4,000 x g for 5 minutes. The supernatant was sequentially extracted with equal volumes phenol:chloroform, and acid phenol:chloroform (pH 4.5) using phase divider gels (Sigma), then precipitated with an equal volume of 100% isopropanol. The pellet was washed twice with 70% ethanol and resuspended in elution buffer (1 mM Tris-Cl). Total RNA was treated with Turbo DNA-free to remove traces of genomic DNA contamination (Ambion). RNA integrity was assessed using a Bioanalyzer (Agilent Biotechnologies) and only samples with a RIN > 7 were used. | biotin | Labeling for Illumina Human6-v2 BeadArrays was performed according to manufacturer’s instructions. Briefly, the Illumina TotalPrep RNA Amplification Kit (Applied Biosystems, Foster City, CA) was used for a first and second strand reverse transcription step from 500 ng of total RNA. This was followed by an overnight in vitro transcription reaction that incorporates biotin-labeled nucleotides. 1.5 ug of biotin-labeled cRNA was mixed with an Illumina-supplied hybridization buffer containing several control oligonucleotides. | 9606 | Hybridization for Illumina Human6-v2 BeadArrays was performed according to manufacturer’s instructions. Labeled cRNA was hybridized to BeadArrays at 58°C for 18 hr. Washing, blocking, and streptavadin-Cy3 staining was performed out following manufacturer’s protocol. | BeadChips were scanned on the BeadArray Reader and scanned images were analyzed using BeadStudio software. | Transcript data was log2 transformed, and quantile normalized. | GPL6102 | Shengdar,,Tsai | North Carolina State University | 4700 Hillsborough St. | Raleigh | NC | 27604 | USA | NONE | 48701 | Reanalyzed by: GSE75010 | B | preeclamptic | M | 38 | induced | placenta |
| GSM635909 | human.placenta.703 | GSM635909 | Public on Dec 10 2010 | Dec 07 2010 | Nov 13 2015 | RNA | 1 | human placenta | Homo sapiens | tissue: placenta | gender: F | classification: Control | gestational age: 37 | induction of labor: spontaneous | batch: B | total RNA | Total RNA was isolated from term human placenta using the Totally RNA kit (Ambion) following the manufacturer’s instructions with slight modifications. Briefly, homogenized tissue chilled in liquid nitrogen was lysed in 10 volumes of denaturation solution (200 mg tissue, 2 ml denaturation solution). The lysed sample was pre-cleared of bulk genomic DNA and cellular debris by spinning at 4,000 x g for 5 minutes. The supernatant was sequentially extracted with equal volumes phenol:chloroform, and acid phenol:chloroform (pH 4.5) using phase divider gels (Sigma), then precipitated with an equal volume of 100% isopropanol. The pellet was washed twice with 70% ethanol and resuspended in elution buffer (1 mM Tris-Cl). Total RNA was treated with Turbo DNA-free to remove traces of genomic DNA contamination (Ambion). RNA integrity was assessed using a Bioanalyzer (Agilent Biotechnologies) and only samples with a RIN > 7 were used. | biotin | Labeling for Illumina Human6-v2 BeadArrays was performed according to manufacturer’s instructions. Briefly, the Illumina TotalPrep RNA Amplification Kit (Applied Biosystems, Foster City, CA) was used for a first and second strand reverse transcription step from 500 ng of total RNA. This was followed by an overnight in vitro transcription reaction that incorporates biotin-labeled nucleotides. 1.5 ug of biotin-labeled cRNA was mixed with an Illumina-supplied hybridization buffer containing several control oligonucleotides. | 9606 | Hybridization for Illumina Human6-v2 BeadArrays was performed according to manufacturer’s instructions. Labeled cRNA was hybridized to BeadArrays at 58°C for 18 hr. Washing, blocking, and streptavadin-Cy3 staining was performed out following manufacturer’s protocol. | BeadChips were scanned on the BeadArray Reader and scanned images were analyzed using BeadStudio software. | Transcript data was log2 transformed, and quantile normalized. | GPL6102 | Shengdar,,Tsai | North Carolina State University | 4700 Hillsborough St. | Raleigh | NC | 27604 | USA | NONE | 48701 | Reanalyzed by: GSE75010 | B | Control | F | 37 | spontaneous | placenta |
| GSM635910 | human.placenta.710 | GSM635910 | Public on Dec 10 2010 | Dec 07 2010 | Nov 13 2015 | RNA | 1 | human placenta | Homo sapiens | tissue: placenta | gender: F | classification: Control | gestational age: 37 | induction of labor: spontaneous | batch: B | total RNA | Total RNA was isolated from term human placenta using the Totally RNA kit (Ambion) following the manufacturer’s instructions with slight modifications. Briefly, homogenized tissue chilled in liquid nitrogen was lysed in 10 volumes of denaturation solution (200 mg tissue, 2 ml denaturation solution). The lysed sample was pre-cleared of bulk genomic DNA and cellular debris by spinning at 4,000 x g for 5 minutes. The supernatant was sequentially extracted with equal volumes phenol:chloroform, and acid phenol:chloroform (pH 4.5) using phase divider gels (Sigma), then precipitated with an equal volume of 100% isopropanol. The pellet was washed twice with 70% ethanol and resuspended in elution buffer (1 mM Tris-Cl). Total RNA was treated with Turbo DNA-free to remove traces of genomic DNA contamination (Ambion). RNA integrity was assessed using a Bioanalyzer (Agilent Biotechnologies) and only samples with a RIN > 7 were used. | biotin | Labeling for Illumina Human6-v2 BeadArrays was performed according to manufacturer’s instructions. Briefly, the Illumina TotalPrep RNA Amplification Kit (Applied Biosystems, Foster City, CA) was used for a first and second strand reverse transcription step from 500 ng of total RNA. This was followed by an overnight in vitro transcription reaction that incorporates biotin-labeled nucleotides. 1.5 ug of biotin-labeled cRNA was mixed with an Illumina-supplied hybridization buffer containing several control oligonucleotides. | 9606 | Hybridization for Illumina Human6-v2 BeadArrays was performed according to manufacturer’s instructions. Labeled cRNA was hybridized to BeadArrays at 58°C for 18 hr. Washing, blocking, and streptavadin-Cy3 staining was performed out following manufacturer’s protocol. | BeadChips were scanned on the BeadArray Reader and scanned images were analyzed using BeadStudio software. | Transcript data was log2 transformed, and quantile normalized. | GPL6102 | Shengdar,,Tsai | North Carolina State University | 4700 Hillsborough St. | Raleigh | NC | 27604 | USA | NONE | 48701 | Reanalyzed by: GSE75010 | B | Control | F | 37 | spontaneous | placenta |
| GSM635911 | human.placenta.758 | GSM635911 | Public on Dec 10 2010 | Dec 07 2010 | Nov 13 2015 | RNA | 1 | human placenta | Homo sapiens | tissue: placenta | gender: M | classification: Control | gestational age: 39 | induction of labor: spontaneous | batch: B | total RNA | Total RNA was isolated from term human placenta using the Totally RNA kit (Ambion) following the manufacturer’s instructions with slight modifications. Briefly, homogenized tissue chilled in liquid nitrogen was lysed in 10 volumes of denaturation solution (200 mg tissue, 2 ml denaturation solution). The lysed sample was pre-cleared of bulk genomic DNA and cellular debris by spinning at 4,000 x g for 5 minutes. The supernatant was sequentially extracted with equal volumes phenol:chloroform, and acid phenol:chloroform (pH 4.5) using phase divider gels (Sigma), then precipitated with an equal volume of 100% isopropanol. The pellet was washed twice with 70% ethanol and resuspended in elution buffer (1 mM Tris-Cl). Total RNA was treated with Turbo DNA-free to remove traces of genomic DNA contamination (Ambion). RNA integrity was assessed using a Bioanalyzer (Agilent Biotechnologies) and only samples with a RIN > 7 were used. | biotin | Labeling for Illumina Human6-v2 BeadArrays was performed according to manufacturer’s instructions. Briefly, the Illumina TotalPrep RNA Amplification Kit (Applied Biosystems, Foster City, CA) was used for a first and second strand reverse transcription step from 500 ng of total RNA. This was followed by an overnight in vitro transcription reaction that incorporates biotin-labeled nucleotides. 1.5 ug of biotin-labeled cRNA was mixed with an Illumina-supplied hybridization buffer containing several control oligonucleotides. | 9606 | Hybridization for Illumina Human6-v2 BeadArrays was performed according to manufacturer’s instructions. Labeled cRNA was hybridized to BeadArrays at 58°C for 18 hr. Washing, blocking, and streptavadin-Cy3 staining was performed out following manufacturer’s protocol. | BeadChips were scanned on the BeadArray Reader and scanned images were analyzed using BeadStudio software. | Transcript data was log2 transformed, and quantile normalized. | GPL6102 | Shengdar,,Tsai | North Carolina State University | 4700 Hillsborough St. | Raleigh | NC | 27604 | USA | NONE | 48701 | Reanalyzed by: GSE75010 | B | Control | M | 39 | spontaneous | placenta |
| GSM635912 | human.placenta.037 | GSM635912 | Public on Dec 10 2010 | Dec 07 2010 | Nov 13 2015 | RNA | 1 | human placenta | Homo sapiens | tissue: placenta | gender: F | classification: preeclamptic | gestational age: 27 | induction of labor: induced | batch: B | total RNA | Total RNA was isolated from term human placenta using the Totally RNA kit (Ambion) following the manufacturer’s instructions with slight modifications. Briefly, homogenized tissue chilled in liquid nitrogen was lysed in 10 volumes of denaturation solution (200 mg tissue, 2 ml denaturation solution). The lysed sample was pre-cleared of bulk genomic DNA and cellular debris by spinning at 4,000 x g for 5 minutes. The supernatant was sequentially extracted with equal volumes phenol:chloroform, and acid phenol:chloroform (pH 4.5) using phase divider gels (Sigma), then precipitated with an equal volume of 100% isopropanol. The pellet was washed twice with 70% ethanol and resuspended in elution buffer (1 mM Tris-Cl). Total RNA was treated with Turbo DNA-free to remove traces of genomic DNA contamination (Ambion). RNA integrity was assessed using a Bioanalyzer (Agilent Biotechnologies) and only samples with a RIN > 7 were used. | biotin | Labeling for Illumina Human6-v2 BeadArrays was performed according to manufacturer’s instructions. Briefly, the Illumina TotalPrep RNA Amplification Kit (Applied Biosystems, Foster City, CA) was used for a first and second strand reverse transcription step from 500 ng of total RNA. This was followed by an overnight in vitro transcription reaction that incorporates biotin-labeled nucleotides. 1.5 ug of biotin-labeled cRNA was mixed with an Illumina-supplied hybridization buffer containing several control oligonucleotides. | 9606 | Hybridization for Illumina Human6-v2 BeadArrays was performed according to manufacturer’s instructions. Labeled cRNA was hybridized to BeadArrays at 58°C for 18 hr. Washing, blocking, and streptavadin-Cy3 staining was performed out following manufacturer’s protocol. | BeadChips were scanned on the BeadArray Reader and scanned images were analyzed using BeadStudio software. | Transcript data was log2 transformed, and quantile normalized. | GPL6102 | Shengdar,,Tsai | North Carolina State University | 4700 Hillsborough St. | Raleigh | NC | 27604 | USA | NONE | 48701 | Reanalyzed by: GSE75010 | B | preeclamptic | F | 27 | induced | placenta |
| GSM635913 | human.placenta.761 | GSM635913 | Public on Dec 10 2010 | Dec 07 2010 | Nov 13 2015 | RNA | 1 | human placenta | Homo sapiens | tissue: placenta | gender: M | classification: Control | gestational age: 38 | induction of labor: spontaneous | batch: B | total RNA | Total RNA was isolated from term human placenta using the Totally RNA kit (Ambion) following the manufacturer’s instructions with slight modifications. Briefly, homogenized tissue chilled in liquid nitrogen was lysed in 10 volumes of denaturation solution (200 mg tissue, 2 ml denaturation solution). The lysed sample was pre-cleared of bulk genomic DNA and cellular debris by spinning at 4,000 x g for 5 minutes. The supernatant was sequentially extracted with equal volumes phenol:chloroform, and acid phenol:chloroform (pH 4.5) using phase divider gels (Sigma), then precipitated with an equal volume of 100% isopropanol. The pellet was washed twice with 70% ethanol and resuspended in elution buffer (1 mM Tris-Cl). Total RNA was treated with Turbo DNA-free to remove traces of genomic DNA contamination (Ambion). RNA integrity was assessed using a Bioanalyzer (Agilent Biotechnologies) and only samples with a RIN > 7 were used. | biotin | Labeling for Illumina Human6-v2 BeadArrays was performed according to manufacturer’s instructions. Briefly, the Illumina TotalPrep RNA Amplification Kit (Applied Biosystems, Foster City, CA) was used for a first and second strand reverse transcription step from 500 ng of total RNA. This was followed by an overnight in vitro transcription reaction that incorporates biotin-labeled nucleotides. 1.5 ug of biotin-labeled cRNA was mixed with an Illumina-supplied hybridization buffer containing several control oligonucleotides. | 9606 | Hybridization for Illumina Human6-v2 BeadArrays was performed according to manufacturer’s instructions. Labeled cRNA was hybridized to BeadArrays at 58°C for 18 hr. Washing, blocking, and streptavadin-Cy3 staining was performed out following manufacturer’s protocol. | BeadChips were scanned on the BeadArray Reader and scanned images were analyzed using BeadStudio software. | Transcript data was log2 transformed, and quantile normalized. | GPL6102 | Shengdar,,Tsai | North Carolina State University | 4700 Hillsborough St. | Raleigh | NC | 27604 | USA | NONE | 48701 | Reanalyzed by: GSE75010 | B | Control | M | 38 | spontaneous | placenta |
| GSM635914 | human.placenta.032 | GSM635914 | Public on Dec 10 2010 | Dec 07 2010 | Nov 13 2015 | RNA | 1 | human placenta | Homo sapiens | tissue: placenta | gender: F | classification: preeclamptic | gestational age: 38 | induction of labor: spontaneous | batch: B | total RNA | Total RNA was isolated from term human placenta using the Totally RNA kit (Ambion) following the manufacturer’s instructions with slight modifications. Briefly, homogenized tissue chilled in liquid nitrogen was lysed in 10 volumes of denaturation solution (200 mg tissue, 2 ml denaturation solution). The lysed sample was pre-cleared of bulk genomic DNA and cellular debris by spinning at 4,000 x g for 5 minutes. The supernatant was sequentially extracted with equal volumes phenol:chloroform, and acid phenol:chloroform (pH 4.5) using phase divider gels (Sigma), then precipitated with an equal volume of 100% isopropanol. The pellet was washed twice with 70% ethanol and resuspended in elution buffer (1 mM Tris-Cl). Total RNA was treated with Turbo DNA-free to remove traces of genomic DNA contamination (Ambion). RNA integrity was assessed using a Bioanalyzer (Agilent Biotechnologies) and only samples with a RIN > 7 were used. | biotin | Labeling for Illumina Human6-v2 BeadArrays was performed according to manufacturer’s instructions. Briefly, the Illumina TotalPrep RNA Amplification Kit (Applied Biosystems, Foster City, CA) was used for a first and second strand reverse transcription step from 500 ng of total RNA. This was followed by an overnight in vitro transcription reaction that incorporates biotin-labeled nucleotides. 1.5 ug of biotin-labeled cRNA was mixed with an Illumina-supplied hybridization buffer containing several control oligonucleotides. | 9606 | Hybridization for Illumina Human6-v2 BeadArrays was performed according to manufacturer’s instructions. Labeled cRNA was hybridized to BeadArrays at 58°C for 18 hr. Washing, blocking, and streptavadin-Cy3 staining was performed out following manufacturer’s protocol. | BeadChips were scanned on the BeadArray Reader and scanned images were analyzed using BeadStudio software. | Transcript data was log2 transformed, and quantile normalized. | GPL6102 | Shengdar,,Tsai | North Carolina State University | 4700 Hillsborough St. | Raleigh | NC | 27604 | USA | NONE | 48701 | Reanalyzed by: GSE75010 | B | preeclamptic | F | 38 | spontaneous | placenta |
| GSM635915 | human.placenta.009 | GSM635915 | Public on Dec 10 2010 | Dec 07 2010 | Nov 13 2015 | RNA | 1 | human placenta | Homo sapiens | tissue: placenta | gender: M | classification: preeclamptic | gestational age: 34 | induction of labor: induced | batch: B | total RNA | Total RNA was isolated from term human placenta using the Totally RNA kit (Ambion) following the manufacturer’s instructions with slight modifications. Briefly, homogenized tissue chilled in liquid nitrogen was lysed in 10 volumes of denaturation solution (200 mg tissue, 2 ml denaturation solution). The lysed sample was pre-cleared of bulk genomic DNA and cellular debris by spinning at 4,000 x g for 5 minutes. The supernatant was sequentially extracted with equal volumes phenol:chloroform, and acid phenol:chloroform (pH 4.5) using phase divider gels (Sigma), then precipitated with an equal volume of 100% isopropanol. The pellet was washed twice with 70% ethanol and resuspended in elution buffer (1 mM Tris-Cl). Total RNA was treated with Turbo DNA-free to remove traces of genomic DNA contamination (Ambion). RNA integrity was assessed using a Bioanalyzer (Agilent Biotechnologies) and only samples with a RIN > 7 were used. | biotin | Labeling for Illumina Human6-v2 BeadArrays was performed according to manufacturer’s instructions. Briefly, the Illumina TotalPrep RNA Amplification Kit (Applied Biosystems, Foster City, CA) was used for a first and second strand reverse transcription step from 500 ng of total RNA. This was followed by an overnight in vitro transcription reaction that incorporates biotin-labeled nucleotides. 1.5 ug of biotin-labeled cRNA was mixed with an Illumina-supplied hybridization buffer containing several control oligonucleotides. | 9606 | Hybridization for Illumina Human6-v2 BeadArrays was performed according to manufacturer’s instructions. Labeled cRNA was hybridized to BeadArrays at 58°C for 18 hr. Washing, blocking, and streptavadin-Cy3 staining was performed out following manufacturer’s protocol. | BeadChips were scanned on the BeadArray Reader and scanned images were analyzed using BeadStudio software. | Transcript data was log2 transformed, and quantile normalized. | GPL6102 | Shengdar,,Tsai | North Carolina State University | 4700 Hillsborough St. | Raleigh | NC | 27604 | USA | NONE | 48701 | Reanalyzed by: GSE75010 | B | preeclamptic | M | 34 | induced | placenta |
| GSM635916 | human.placenta.646 | GSM635916 | Public on Dec 10 2010 | Dec 07 2010 | Nov 13 2015 | RNA | 1 | human placenta | Homo sapiens | tissue: placenta | gender: F | classification: Control | gestational age: 39 | induction of labor: spontaneous | batch: B | total RNA | Total RNA was isolated from term human placenta using the Totally RNA kit (Ambion) following the manufacturer’s instructions with slight modifications. Briefly, homogenized tissue chilled in liquid nitrogen was lysed in 10 volumes of denaturation solution (200 mg tissue, 2 ml denaturation solution). The lysed sample was pre-cleared of bulk genomic DNA and cellular debris by spinning at 4,000 x g for 5 minutes. The supernatant was sequentially extracted with equal volumes phenol:chloroform, and acid phenol:chloroform (pH 4.5) using phase divider gels (Sigma), then precipitated with an equal volume of 100% isopropanol. The pellet was washed twice with 70% ethanol and resuspended in elution buffer (1 mM Tris-Cl). Total RNA was treated with Turbo DNA-free to remove traces of genomic DNA contamination (Ambion). RNA integrity was assessed using a Bioanalyzer (Agilent Biotechnologies) and only samples with a RIN > 7 were used. | biotin | Labeling for Illumina Human6-v2 BeadArrays was performed according to manufacturer’s instructions. Briefly, the Illumina TotalPrep RNA Amplification Kit (Applied Biosystems, Foster City, CA) was used for a first and second strand reverse transcription step from 500 ng of total RNA. This was followed by an overnight in vitro transcription reaction that incorporates biotin-labeled nucleotides. 1.5 ug of biotin-labeled cRNA was mixed with an Illumina-supplied hybridization buffer containing several control oligonucleotides. | 9606 | Hybridization for Illumina Human6-v2 BeadArrays was performed according to manufacturer’s instructions. Labeled cRNA was hybridized to BeadArrays at 58°C for 18 hr. Washing, blocking, and streptavadin-Cy3 staining was performed out following manufacturer’s protocol. | BeadChips were scanned on the BeadArray Reader and scanned images were analyzed using BeadStudio software. | Transcript data was log2 transformed, and quantile normalized. | GPL6102 | Shengdar,,Tsai | North Carolina State University | 4700 Hillsborough St. | Raleigh | NC | 27604 | USA | NONE | 48701 | Reanalyzed by: GSE75010 | B | Control | F | 39 | spontaneous | placenta |
| GSM635917 | human.placenta.726 | GSM635917 | Public on Dec 10 2010 | Dec 07 2010 | Nov 13 2015 | RNA | 1 | human placenta | Homo sapiens | tissue: placenta | gender: F | classification: Control | gestational age: 37 | induction of labor: spontaneous | batch: B | total RNA | Total RNA was isolated from term human placenta using the Totally RNA kit (Ambion) following the manufacturer’s instructions with slight modifications. Briefly, homogenized tissue chilled in liquid nitrogen was lysed in 10 volumes of denaturation solution (200 mg tissue, 2 ml denaturation solution). The lysed sample was pre-cleared of bulk genomic DNA and cellular debris by spinning at 4,000 x g for 5 minutes. The supernatant was sequentially extracted with equal volumes phenol:chloroform, and acid phenol:chloroform (pH 4.5) using phase divider gels (Sigma), then precipitated with an equal volume of 100% isopropanol. The pellet was washed twice with 70% ethanol and resuspended in elution buffer (1 mM Tris-Cl). Total RNA was treated with Turbo DNA-free to remove traces of genomic DNA contamination (Ambion). RNA integrity was assessed using a Bioanalyzer (Agilent Biotechnologies) and only samples with a RIN > 7 were used. | biotin | Labeling for Illumina Human6-v2 BeadArrays was performed according to manufacturer’s instructions. Briefly, the Illumina TotalPrep RNA Amplification Kit (Applied Biosystems, Foster City, CA) was used for a first and second strand reverse transcription step from 500 ng of total RNA. This was followed by an overnight in vitro transcription reaction that incorporates biotin-labeled nucleotides. 1.5 ug of biotin-labeled cRNA was mixed with an Illumina-supplied hybridization buffer containing several control oligonucleotides. | 9606 | Hybridization for Illumina Human6-v2 BeadArrays was performed according to manufacturer’s instructions. Labeled cRNA was hybridized to BeadArrays at 58°C for 18 hr. Washing, blocking, and streptavadin-Cy3 staining was performed out following manufacturer’s protocol. | BeadChips were scanned on the BeadArray Reader and scanned images were analyzed using BeadStudio software. | Transcript data was log2 transformed, and quantile normalized. | GPL6102 | Shengdar,,Tsai | North Carolina State University | 4700 Hillsborough St. | Raleigh | NC | 27604 | USA | NONE | 48701 | Reanalyzed by: GSE75010 | B | Control | F | 37 | spontaneous | placenta |
| GSM635918 | human.placenta.730 | GSM635918 | Public on Dec 10 2010 | Dec 07 2010 | Nov 13 2015 | RNA | 1 | human placenta | Homo sapiens | tissue: placenta | gender: F | classification: Control | gestational age: 38 | induction of labor: induced | batch: B | total RNA | Total RNA was isolated from term human placenta using the Totally RNA kit (Ambion) following the manufacturer’s instructions with slight modifications. Briefly, homogenized tissue chilled in liquid nitrogen was lysed in 10 volumes of denaturation solution (200 mg tissue, 2 ml denaturation solution). The lysed sample was pre-cleared of bulk genomic DNA and cellular debris by spinning at 4,000 x g for 5 minutes. The supernatant was sequentially extracted with equal volumes phenol:chloroform, and acid phenol:chloroform (pH 4.5) using phase divider gels (Sigma), then precipitated with an equal volume of 100% isopropanol. The pellet was washed twice with 70% ethanol and resuspended in elution buffer (1 mM Tris-Cl). Total RNA was treated with Turbo DNA-free to remove traces of genomic DNA contamination (Ambion). RNA integrity was assessed using a Bioanalyzer (Agilent Biotechnologies) and only samples with a RIN > 7 were used. | biotin | Labeling for Illumina Human6-v2 BeadArrays was performed according to manufacturer’s instructions. Briefly, the Illumina TotalPrep RNA Amplification Kit (Applied Biosystems, Foster City, CA) was used for a first and second strand reverse transcription step from 500 ng of total RNA. This was followed by an overnight in vitro transcription reaction that incorporates biotin-labeled nucleotides. 1.5 ug of biotin-labeled cRNA was mixed with an Illumina-supplied hybridization buffer containing several control oligonucleotides. | 9606 | Hybridization for Illumina Human6-v2 BeadArrays was performed according to manufacturer’s instructions. Labeled cRNA was hybridized to BeadArrays at 58°C for 18 hr. Washing, blocking, and streptavadin-Cy3 staining was performed out following manufacturer’s protocol. | BeadChips were scanned on the BeadArray Reader and scanned images were analyzed using BeadStudio software. | Transcript data was log2 transformed, and quantile normalized. | GPL6102 | Shengdar,,Tsai | North Carolina State University | 4700 Hillsborough St. | Raleigh | NC | 27604 | USA | NONE | 48701 | Reanalyzed by: GSE75010 | B | Control | F | 38 | induced | placenta |
| GSM635919 | human.placenta.743 | GSM635919 | Public on Dec 10 2010 | Dec 07 2010 | Nov 13 2015 | RNA | 1 | human placenta | Homo sapiens | tissue: placenta | gender: M | classification: Control | gestational age: 39 | induction of labor: induced | batch: B | total RNA | Total RNA was isolated from term human placenta using the Totally RNA kit (Ambion) following the manufacturer’s instructions with slight modifications. Briefly, homogenized tissue chilled in liquid nitrogen was lysed in 10 volumes of denaturation solution (200 mg tissue, 2 ml denaturation solution). The lysed sample was pre-cleared of bulk genomic DNA and cellular debris by spinning at 4,000 x g for 5 minutes. The supernatant was sequentially extracted with equal volumes phenol:chloroform, and acid phenol:chloroform (pH 4.5) using phase divider gels (Sigma), then precipitated with an equal volume of 100% isopropanol. The pellet was washed twice with 70% ethanol and resuspended in elution buffer (1 mM Tris-Cl). Total RNA was treated with Turbo DNA-free to remove traces of genomic DNA contamination (Ambion). RNA integrity was assessed using a Bioanalyzer (Agilent Biotechnologies) and only samples with a RIN > 7 were used. | biotin | Labeling for Illumina Human6-v2 BeadArrays was performed according to manufacturer’s instructions. Briefly, the Illumina TotalPrep RNA Amplification Kit (Applied Biosystems, Foster City, CA) was used for a first and second strand reverse transcription step from 500 ng of total RNA. This was followed by an overnight in vitro transcription reaction that incorporates biotin-labeled nucleotides. 1.5 ug of biotin-labeled cRNA was mixed with an Illumina-supplied hybridization buffer containing several control oligonucleotides. | 9606 | Hybridization for Illumina Human6-v2 BeadArrays was performed according to manufacturer’s instructions. Labeled cRNA was hybridized to BeadArrays at 58°C for 18 hr. Washing, blocking, and streptavadin-Cy3 staining was performed out following manufacturer’s protocol. | BeadChips were scanned on the BeadArray Reader and scanned images were analyzed using BeadStudio software. | Transcript data was log2 transformed, and quantile normalized. | GPL6102 | Shengdar,,Tsai | North Carolina State University | 4700 Hillsborough St. | Raleigh | NC | 27604 | USA | NONE | 48701 | Reanalyzed by: GSE75010 | B | Control | M | 39 | induced | placenta |
| GSM635920 | human.placenta.021 | GSM635920 | Public on Dec 10 2010 | Dec 07 2010 | Nov 13 2015 | RNA | 1 | human placenta | Homo sapiens | tissue: placenta | gender: F | classification: preeclamptic | gestational age: 35 | induction of labor: induced | batch: B | total RNA | Total RNA was isolated from term human placenta using the Totally RNA kit (Ambion) following the manufacturer’s instructions with slight modifications. Briefly, homogenized tissue chilled in liquid nitrogen was lysed in 10 volumes of denaturation solution (200 mg tissue, 2 ml denaturation solution). The lysed sample was pre-cleared of bulk genomic DNA and cellular debris by spinning at 4,000 x g for 5 minutes. The supernatant was sequentially extracted with equal volumes phenol:chloroform, and acid phenol:chloroform (pH 4.5) using phase divider gels (Sigma), then precipitated with an equal volume of 100% isopropanol. The pellet was washed twice with 70% ethanol and resuspended in elution buffer (1 mM Tris-Cl). Total RNA was treated with Turbo DNA-free to remove traces of genomic DNA contamination (Ambion). RNA integrity was assessed using a Bioanalyzer (Agilent Biotechnologies) and only samples with a RIN > 7 were used. | biotin | Labeling for Illumina Human6-v2 BeadArrays was performed according to manufacturer’s instructions. Briefly, the Illumina TotalPrep RNA Amplification Kit (Applied Biosystems, Foster City, CA) was used for a first and second strand reverse transcription step from 500 ng of total RNA. This was followed by an overnight in vitro transcription reaction that incorporates biotin-labeled nucleotides. 1.5 ug of biotin-labeled cRNA was mixed with an Illumina-supplied hybridization buffer containing several control oligonucleotides. | 9606 | Hybridization for Illumina Human6-v2 BeadArrays was performed according to manufacturer’s instructions. Labeled cRNA was hybridized to BeadArrays at 58°C for 18 hr. Washing, blocking, and streptavadin-Cy3 staining was performed out following manufacturer’s protocol. | BeadChips were scanned on the BeadArray Reader and scanned images were analyzed using BeadStudio software. | Transcript data was log2 transformed, and quantile normalized. | GPL6102 | Shengdar,,Tsai | North Carolina State University | 4700 Hillsborough St. | Raleigh | NC | 27604 | USA | NONE | 48701 | Reanalyzed by: GSE75010 | B | preeclamptic | F | 35 | induced | placenta |
| GSM635921 | human.placenta.744 | GSM635921 | Public on Dec 10 2010 | Dec 07 2010 | Nov 13 2015 | RNA | 1 | human placenta | Homo sapiens | tissue: placenta | gender: M | classification: Control | gestational age: 37 | induction of labor: spontaneous | batch: B | total RNA | Total RNA was isolated from term human placenta using the Totally RNA kit (Ambion) following the manufacturer’s instructions with slight modifications. Briefly, homogenized tissue chilled in liquid nitrogen was lysed in 10 volumes of denaturation solution (200 mg tissue, 2 ml denaturation solution). The lysed sample was pre-cleared of bulk genomic DNA and cellular debris by spinning at 4,000 x g for 5 minutes. The supernatant was sequentially extracted with equal volumes phenol:chloroform, and acid phenol:chloroform (pH 4.5) using phase divider gels (Sigma), then precipitated with an equal volume of 100% isopropanol. The pellet was washed twice with 70% ethanol and resuspended in elution buffer (1 mM Tris-Cl). Total RNA was treated with Turbo DNA-free to remove traces of genomic DNA contamination (Ambion). RNA integrity was assessed using a Bioanalyzer (Agilent Biotechnologies) and only samples with a RIN > 7 were used. | biotin | Labeling for Illumina Human6-v2 BeadArrays was performed according to manufacturer’s instructions. Briefly, the Illumina TotalPrep RNA Amplification Kit (Applied Biosystems, Foster City, CA) was used for a first and second strand reverse transcription step from 500 ng of total RNA. This was followed by an overnight in vitro transcription reaction that incorporates biotin-labeled nucleotides. 1.5 ug of biotin-labeled cRNA was mixed with an Illumina-supplied hybridization buffer containing several control oligonucleotides. | 9606 | Hybridization for Illumina Human6-v2 BeadArrays was performed according to manufacturer’s instructions. Labeled cRNA was hybridized to BeadArrays at 58°C for 18 hr. Washing, blocking, and streptavadin-Cy3 staining was performed out following manufacturer’s protocol. | BeadChips were scanned on the BeadArray Reader and scanned images were analyzed using BeadStudio software. | Transcript data was log2 transformed, and quantile normalized. | GPL6102 | Shengdar,,Tsai | North Carolina State University | 4700 Hillsborough St. | Raleigh | NC | 27604 | USA | NONE | 48701 | Reanalyzed by: GSE75010 | B | Control | M | 37 | spontaneous | placenta |
| GSM635922 | human.placenta.015 | GSM635922 | Public on Dec 10 2010 | Dec 07 2010 | Nov 13 2015 | RNA | 1 | human placenta | Homo sapiens | tissue: placenta | gender: F | classification: preeclamptic | gestational age: 32 | induction of labor: induced | batch: B | total RNA | Total RNA was isolated from term human placenta using the Totally RNA kit (Ambion) following the manufacturer’s instructions with slight modifications. Briefly, homogenized tissue chilled in liquid nitrogen was lysed in 10 volumes of denaturation solution (200 mg tissue, 2 ml denaturation solution). The lysed sample was pre-cleared of bulk genomic DNA and cellular debris by spinning at 4,000 x g for 5 minutes. The supernatant was sequentially extracted with equal volumes phenol:chloroform, and acid phenol:chloroform (pH 4.5) using phase divider gels (Sigma), then precipitated with an equal volume of 100% isopropanol. The pellet was washed twice with 70% ethanol and resuspended in elution buffer (1 mM Tris-Cl). Total RNA was treated with Turbo DNA-free to remove traces of genomic DNA contamination (Ambion). RNA integrity was assessed using a Bioanalyzer (Agilent Biotechnologies) and only samples with a RIN > 7 were used. | biotin | Labeling for Illumina Human6-v2 BeadArrays was performed according to manufacturer’s instructions. Briefly, the Illumina TotalPrep RNA Amplification Kit (Applied Biosystems, Foster City, CA) was used for a first and second strand reverse transcription step from 500 ng of total RNA. This was followed by an overnight in vitro transcription reaction that incorporates biotin-labeled nucleotides. 1.5 ug of biotin-labeled cRNA was mixed with an Illumina-supplied hybridization buffer containing several control oligonucleotides. | 9606 | Hybridization for Illumina Human6-v2 BeadArrays was performed according to manufacturer’s instructions. Labeled cRNA was hybridized to BeadArrays at 58°C for 18 hr. Washing, blocking, and streptavadin-Cy3 staining was performed out following manufacturer’s protocol. | BeadChips were scanned on the BeadArray Reader and scanned images were analyzed using BeadStudio software. | Transcript data was log2 transformed, and quantile normalized. | GPL6102 | Shengdar,,Tsai | North Carolina State University | 4700 Hillsborough St. | Raleigh | NC | 27604 | USA | NONE | 48701 | Reanalyzed by: GSE75010 | B | preeclamptic | F | 32 | induced | placenta |
| GSM635923 | human.placenta.024 | GSM635923 | Public on Dec 10 2010 | Dec 07 2010 | Nov 13 2015 | RNA | 1 | human placenta | Homo sapiens | tissue: placenta | gender: M | classification: preeclamptic | gestational age: 34 | induction of labor: induced | batch: B | total RNA | Total RNA was isolated from term human placenta using the Totally RNA kit (Ambion) following the manufacturer’s instructions with slight modifications. Briefly, homogenized tissue chilled in liquid nitrogen was lysed in 10 volumes of denaturation solution (200 mg tissue, 2 ml denaturation solution). The lysed sample was pre-cleared of bulk genomic DNA and cellular debris by spinning at 4,000 x g for 5 minutes. The supernatant was sequentially extracted with equal volumes phenol:chloroform, and acid phenol:chloroform (pH 4.5) using phase divider gels (Sigma), then precipitated with an equal volume of 100% isopropanol. The pellet was washed twice with 70% ethanol and resuspended in elution buffer (1 mM Tris-Cl). Total RNA was treated with Turbo DNA-free to remove traces of genomic DNA contamination (Ambion). RNA integrity was assessed using a Bioanalyzer (Agilent Biotechnologies) and only samples with a RIN > 7 were used. | biotin | Labeling for Illumina Human6-v2 BeadArrays was performed according to manufacturer’s instructions. Briefly, the Illumina TotalPrep RNA Amplification Kit (Applied Biosystems, Foster City, CA) was used for a first and second strand reverse transcription step from 500 ng of total RNA. This was followed by an overnight in vitro transcription reaction that incorporates biotin-labeled nucleotides. 1.5 ug of biotin-labeled cRNA was mixed with an Illumina-supplied hybridization buffer containing several control oligonucleotides. | 9606 | Hybridization for Illumina Human6-v2 BeadArrays was performed according to manufacturer’s instructions. Labeled cRNA was hybridized to BeadArrays at 58°C for 18 hr. Washing, blocking, and streptavadin-Cy3 staining was performed out following manufacturer’s protocol. | BeadChips were scanned on the BeadArray Reader and scanned images were analyzed using BeadStudio software. | Transcript data was log2 transformed, and quantile normalized. | GPL6102 | Shengdar,,Tsai | North Carolina State University | 4700 Hillsborough St. | Raleigh | NC | 27604 | USA | NONE | 48701 | Reanalyzed by: GSE75010 | B | preeclamptic | M | 34 | induced | placenta |
| GSM635924 | human.placenta.746 | GSM635924 | Public on Dec 10 2010 | Dec 07 2010 | Nov 13 2015 | RNA | 1 | human placenta | Homo sapiens | tissue: placenta | gender: M | classification: Control | gestational age: 38 | induction of labor: induced | batch: B | total RNA | Total RNA was isolated from term human placenta using the Totally RNA kit (Ambion) following the manufacturer’s instructions with slight modifications. Briefly, homogenized tissue chilled in liquid nitrogen was lysed in 10 volumes of denaturation solution (200 mg tissue, 2 ml denaturation solution). The lysed sample was pre-cleared of bulk genomic DNA and cellular debris by spinning at 4,000 x g for 5 minutes. The supernatant was sequentially extracted with equal volumes phenol:chloroform, and acid phenol:chloroform (pH 4.5) using phase divider gels (Sigma), then precipitated with an equal volume of 100% isopropanol. The pellet was washed twice with 70% ethanol and resuspended in elution buffer (1 mM Tris-Cl). Total RNA was treated with Turbo DNA-free to remove traces of genomic DNA contamination (Ambion). RNA integrity was assessed using a Bioanalyzer (Agilent Biotechnologies) and only samples with a RIN > 7 were used. | biotin | Labeling for Illumina Human6-v2 BeadArrays was performed according to manufacturer’s instructions. Briefly, the Illumina TotalPrep RNA Amplification Kit (Applied Biosystems, Foster City, CA) was used for a first and second strand reverse transcription step from 500 ng of total RNA. This was followed by an overnight in vitro transcription reaction that incorporates biotin-labeled nucleotides. 1.5 ug of biotin-labeled cRNA was mixed with an Illumina-supplied hybridization buffer containing several control oligonucleotides. | 9606 | Hybridization for Illumina Human6-v2 BeadArrays was performed according to manufacturer’s instructions. Labeled cRNA was hybridized to BeadArrays at 58°C for 18 hr. Washing, blocking, and streptavadin-Cy3 staining was performed out following manufacturer’s protocol. | BeadChips were scanned on the BeadArray Reader and scanned images were analyzed using BeadStudio software. | Transcript data was log2 transformed, and quantile normalized. | GPL6102 | Shengdar,,Tsai | North Carolina State University | 4700 Hillsborough St. | Raleigh | NC | 27604 | USA | NONE | 48701 | Reanalyzed by: GSE75010 | B | Control | M | 38 | induced | placenta |
| GSM635925 | human.placenta.763 | GSM635925 | Public on Dec 10 2010 | Dec 07 2010 | Nov 13 2015 | RNA | 1 | human placenta | Homo sapiens | tissue: placenta | gender: M | classification: Control | gestational age: 37 | induction of labor: spontaneous | batch: B | total RNA | Total RNA was isolated from term human placenta using the Totally RNA kit (Ambion) following the manufacturer’s instructions with slight modifications. Briefly, homogenized tissue chilled in liquid nitrogen was lysed in 10 volumes of denaturation solution (200 mg tissue, 2 ml denaturation solution). The lysed sample was pre-cleared of bulk genomic DNA and cellular debris by spinning at 4,000 x g for 5 minutes. The supernatant was sequentially extracted with equal volumes phenol:chloroform, and acid phenol:chloroform (pH 4.5) using phase divider gels (Sigma), then precipitated with an equal volume of 100% isopropanol. The pellet was washed twice with 70% ethanol and resuspended in elution buffer (1 mM Tris-Cl). Total RNA was treated with Turbo DNA-free to remove traces of genomic DNA contamination (Ambion). RNA integrity was assessed using a Bioanalyzer (Agilent Biotechnologies) and only samples with a RIN > 7 were used. | biotin | Labeling for Illumina Human6-v2 BeadArrays was performed according to manufacturer’s instructions. Briefly, the Illumina TotalPrep RNA Amplification Kit (Applied Biosystems, Foster City, CA) was used for a first and second strand reverse transcription step from 500 ng of total RNA. This was followed by an overnight in vitro transcription reaction that incorporates biotin-labeled nucleotides. 1.5 ug of biotin-labeled cRNA was mixed with an Illumina-supplied hybridization buffer containing several control oligonucleotides. | 9606 | Hybridization for Illumina Human6-v2 BeadArrays was performed according to manufacturer’s instructions. Labeled cRNA was hybridized to BeadArrays at 58°C for 18 hr. Washing, blocking, and streptavadin-Cy3 staining was performed out following manufacturer’s protocol. | BeadChips were scanned on the BeadArray Reader and scanned images were analyzed using BeadStudio software. | Transcript data was log2 transformed, and quantile normalized. | GPL6102 | Shengdar,,Tsai | North Carolina State University | 4700 Hillsborough St. | Raleigh | NC | 27604 | USA | NONE | 48701 | Reanalyzed by: GSE75010 | B | Control | M | 37 | spontaneous | placenta |
| GSM635926 | human.placenta.036 | GSM635926 | Public on Dec 10 2010 | Dec 07 2010 | Nov 13 2015 | RNA | 1 | human placenta | Homo sapiens | tissue: placenta | gender: M | classification: preeclamptic | gestational age: 36 | induction of labor: induced | batch: B | total RNA | Total RNA was isolated from term human placenta using the Totally RNA kit (Ambion) following the manufacturer’s instructions with slight modifications. Briefly, homogenized tissue chilled in liquid nitrogen was lysed in 10 volumes of denaturation solution (200 mg tissue, 2 ml denaturation solution). The lysed sample was pre-cleared of bulk genomic DNA and cellular debris by spinning at 4,000 x g for 5 minutes. The supernatant was sequentially extracted with equal volumes phenol:chloroform, and acid phenol:chloroform (pH 4.5) using phase divider gels (Sigma), then precipitated with an equal volume of 100% isopropanol. The pellet was washed twice with 70% ethanol and resuspended in elution buffer (1 mM Tris-Cl). Total RNA was treated with Turbo DNA-free to remove traces of genomic DNA contamination (Ambion). RNA integrity was assessed using a Bioanalyzer (Agilent Biotechnologies) and only samples with a RIN > 7 were used. | biotin | Labeling for Illumina Human6-v2 BeadArrays was performed according to manufacturer’s instructions. Briefly, the Illumina TotalPrep RNA Amplification Kit (Applied Biosystems, Foster City, CA) was used for a first and second strand reverse transcription step from 500 ng of total RNA. This was followed by an overnight in vitro transcription reaction that incorporates biotin-labeled nucleotides. 1.5 ug of biotin-labeled cRNA was mixed with an Illumina-supplied hybridization buffer containing several control oligonucleotides. | 9606 | Hybridization for Illumina Human6-v2 BeadArrays was performed according to manufacturer’s instructions. Labeled cRNA was hybridized to BeadArrays at 58°C for 18 hr. Washing, blocking, and streptavadin-Cy3 staining was performed out following manufacturer’s protocol. | BeadChips were scanned on the BeadArray Reader and scanned images were analyzed using BeadStudio software. | Transcript data was log2 transformed, and quantile normalized. | GPL6102 | Shengdar,,Tsai | North Carolina State University | 4700 Hillsborough St. | Raleigh | NC | 27604 | USA | NONE | 48701 | Reanalyzed by: GSE75010 | B | preeclamptic | M | 36 | induced | placenta |
| GSM635927 | human.placenta.774 | GSM635927 | Public on Dec 10 2010 | Dec 07 2010 | Nov 13 2015 | RNA | 1 | human placenta | Homo sapiens | tissue: placenta | gender: F | classification: Control | gestational age: 40 | induction of labor: induced | batch: B | total RNA | Total RNA was isolated from term human placenta using the Totally RNA kit (Ambion) following the manufacturer’s instructions with slight modifications. Briefly, homogenized tissue chilled in liquid nitrogen was lysed in 10 volumes of denaturation solution (200 mg tissue, 2 ml denaturation solution). The lysed sample was pre-cleared of bulk genomic DNA and cellular debris by spinning at 4,000 x g for 5 minutes. The supernatant was sequentially extracted with equal volumes phenol:chloroform, and acid phenol:chloroform (pH 4.5) using phase divider gels (Sigma), then precipitated with an equal volume of 100% isopropanol. The pellet was washed twice with 70% ethanol and resuspended in elution buffer (1 mM Tris-Cl). Total RNA was treated with Turbo DNA-free to remove traces of genomic DNA contamination (Ambion). RNA integrity was assessed using a Bioanalyzer (Agilent Biotechnologies) and only samples with a RIN > 7 were used. | biotin | Labeling for Illumina Human6-v2 BeadArrays was performed according to manufacturer’s instructions. Briefly, the Illumina TotalPrep RNA Amplification Kit (Applied Biosystems, Foster City, CA) was used for a first and second strand reverse transcription step from 500 ng of total RNA. This was followed by an overnight in vitro transcription reaction that incorporates biotin-labeled nucleotides. 1.5 ug of biotin-labeled cRNA was mixed with an Illumina-supplied hybridization buffer containing several control oligonucleotides. | 9606 | Hybridization for Illumina Human6-v2 BeadArrays was performed according to manufacturer’s instructions. Labeled cRNA was hybridized to BeadArrays at 58°C for 18 hr. Washing, blocking, and streptavadin-Cy3 staining was performed out following manufacturer’s protocol. | BeadChips were scanned on the BeadArray Reader and scanned images were analyzed using BeadStudio software. | Transcript data was log2 transformed, and quantile normalized. | GPL6102 | Shengdar,,Tsai | North Carolina State University | 4700 Hillsborough St. | Raleigh | NC | 27604 | USA | NONE | 48701 | Reanalyzed by: GSE75010 | B | Control | F | 40 | induced | placenta |
| GSM635928 | human.placenta.775 | GSM635928 | Public on Dec 10 2010 | Dec 07 2010 | Nov 13 2015 | RNA | 1 | human placenta | Homo sapiens | tissue: placenta | gender: M | classification: Control | gestational age: 38 | induction of labor: spontaneous | batch: B | total RNA | Total RNA was isolated from term human placenta using the Totally RNA kit (Ambion) following the manufacturer’s instructions with slight modifications. Briefly, homogenized tissue chilled in liquid nitrogen was lysed in 10 volumes of denaturation solution (200 mg tissue, 2 ml denaturation solution). The lysed sample was pre-cleared of bulk genomic DNA and cellular debris by spinning at 4,000 x g for 5 minutes. The supernatant was sequentially extracted with equal volumes phenol:chloroform, and acid phenol:chloroform (pH 4.5) using phase divider gels (Sigma), then precipitated with an equal volume of 100% isopropanol. The pellet was washed twice with 70% ethanol and resuspended in elution buffer (1 mM Tris-Cl). Total RNA was treated with Turbo DNA-free to remove traces of genomic DNA contamination (Ambion). RNA integrity was assessed using a Bioanalyzer (Agilent Biotechnologies) and only samples with a RIN > 7 were used. | biotin | Labeling for Illumina Human6-v2 BeadArrays was performed according to manufacturer’s instructions. Briefly, the Illumina TotalPrep RNA Amplification Kit (Applied Biosystems, Foster City, CA) was used for a first and second strand reverse transcription step from 500 ng of total RNA. This was followed by an overnight in vitro transcription reaction that incorporates biotin-labeled nucleotides. 1.5 ug of biotin-labeled cRNA was mixed with an Illumina-supplied hybridization buffer containing several control oligonucleotides. | 9606 | Hybridization for Illumina Human6-v2 BeadArrays was performed according to manufacturer’s instructions. Labeled cRNA was hybridized to BeadArrays at 58°C for 18 hr. Washing, blocking, and streptavadin-Cy3 staining was performed out following manufacturer’s protocol. | BeadChips were scanned on the BeadArray Reader and scanned images were analyzed using BeadStudio software. | Transcript data was log2 transformed, and quantile normalized. | GPL6102 | Shengdar,,Tsai | North Carolina State University | 4700 Hillsborough St. | Raleigh | NC | 27604 | USA | NONE | 48701 | Reanalyzed by: GSE75010 | B | Control | M | 38 | spontaneous | placenta |
| GSM635929 | human.placenta.776 | GSM635929 | Public on Dec 10 2010 | Dec 07 2010 | Nov 13 2015 | RNA | 1 | human placenta | Homo sapiens | tissue: placenta | gender: M | classification: Control | gestational age: 39 | induction of labor: induced | batch: B | total RNA | Total RNA was isolated from term human placenta using the Totally RNA kit (Ambion) following the manufacturer’s instructions with slight modifications. Briefly, homogenized tissue chilled in liquid nitrogen was lysed in 10 volumes of denaturation solution (200 mg tissue, 2 ml denaturation solution). The lysed sample was pre-cleared of bulk genomic DNA and cellular debris by spinning at 4,000 x g for 5 minutes. The supernatant was sequentially extracted with equal volumes phenol:chloroform, and acid phenol:chloroform (pH 4.5) using phase divider gels (Sigma), then precipitated with an equal volume of 100% isopropanol. The pellet was washed twice with 70% ethanol and resuspended in elution buffer (1 mM Tris-Cl). Total RNA was treated with Turbo DNA-free to remove traces of genomic DNA contamination (Ambion). RNA integrity was assessed using a Bioanalyzer (Agilent Biotechnologies) and only samples with a RIN > 7 were used. | biotin | Labeling for Illumina Human6-v2 BeadArrays was performed according to manufacturer’s instructions. Briefly, the Illumina TotalPrep RNA Amplification Kit (Applied Biosystems, Foster City, CA) was used for a first and second strand reverse transcription step from 500 ng of total RNA. This was followed by an overnight in vitro transcription reaction that incorporates biotin-labeled nucleotides. 1.5 ug of biotin-labeled cRNA was mixed with an Illumina-supplied hybridization buffer containing several control oligonucleotides. | 9606 | Hybridization for Illumina Human6-v2 BeadArrays was performed according to manufacturer’s instructions. Labeled cRNA was hybridized to BeadArrays at 58°C for 18 hr. Washing, blocking, and streptavadin-Cy3 staining was performed out following manufacturer’s protocol. | BeadChips were scanned on the BeadArray Reader and scanned images were analyzed using BeadStudio software. | Transcript data was log2 transformed, and quantile normalized. | GPL6102 | Shengdar,,Tsai | North Carolina State University | 4700 Hillsborough St. | Raleigh | NC | 27604 | USA | NONE | 48701 | Reanalyzed by: GSE75010 | B | Control | M | 39 | induced | placenta |
| GSM635930 | human.placenta.041 | GSM635930 | Public on Dec 10 2010 | Dec 07 2010 | Nov 13 2015 | RNA | 1 | human placenta | Homo sapiens | tissue: placenta | gender: F | classification: preeclamptic | gestational age: 37 | induction of labor: induced | batch: B | total RNA | Total RNA was isolated from term human placenta using the Totally RNA kit (Ambion) following the manufacturer’s instructions with slight modifications. Briefly, homogenized tissue chilled in liquid nitrogen was lysed in 10 volumes of denaturation solution (200 mg tissue, 2 ml denaturation solution). The lysed sample was pre-cleared of bulk genomic DNA and cellular debris by spinning at 4,000 x g for 5 minutes. The supernatant was sequentially extracted with equal volumes phenol:chloroform, and acid phenol:chloroform (pH 4.5) using phase divider gels (Sigma), then precipitated with an equal volume of 100% isopropanol. The pellet was washed twice with 70% ethanol and resuspended in elution buffer (1 mM Tris-Cl). Total RNA was treated with Turbo DNA-free to remove traces of genomic DNA contamination (Ambion). RNA integrity was assessed using a Bioanalyzer (Agilent Biotechnologies) and only samples with a RIN > 7 were used. | biotin | Labeling for Illumina Human6-v2 BeadArrays was performed according to manufacturer’s instructions. Briefly, the Illumina TotalPrep RNA Amplification Kit (Applied Biosystems, Foster City, CA) was used for a first and second strand reverse transcription step from 500 ng of total RNA. This was followed by an overnight in vitro transcription reaction that incorporates biotin-labeled nucleotides. 1.5 ug of biotin-labeled cRNA was mixed with an Illumina-supplied hybridization buffer containing several control oligonucleotides. | 9606 | Hybridization for Illumina Human6-v2 BeadArrays was performed according to manufacturer’s instructions. Labeled cRNA was hybridized to BeadArrays at 58°C for 18 hr. Washing, blocking, and streptavadin-Cy3 staining was performed out following manufacturer’s protocol. | BeadChips were scanned on the BeadArray Reader and scanned images were analyzed using BeadStudio software. | Transcript data was log2 transformed, and quantile normalized. | GPL6102 | Shengdar,,Tsai | North Carolina State University | 4700 Hillsborough St. | Raleigh | NC | 27604 | USA | NONE | 48701 | Reanalyzed by: GSE75010 | B | preeclamptic | F | 37 | induced | placenta |
| GSM635931 | human.placenta.787 | GSM635931 | Public on Dec 10 2010 | Dec 07 2010 | Nov 13 2015 | RNA | 1 | human placenta | Homo sapiens | tissue: placenta | gender: F | classification: Control | gestational age: 34 | induction of labor: spontaneous | batch: B | total RNA | Total RNA was isolated from term human placenta using the Totally RNA kit (Ambion) following the manufacturer’s instructions with slight modifications. Briefly, homogenized tissue chilled in liquid nitrogen was lysed in 10 volumes of denaturation solution (200 mg tissue, 2 ml denaturation solution). The lysed sample was pre-cleared of bulk genomic DNA and cellular debris by spinning at 4,000 x g for 5 minutes. The supernatant was sequentially extracted with equal volumes phenol:chloroform, and acid phenol:chloroform (pH 4.5) using phase divider gels (Sigma), then precipitated with an equal volume of 100% isopropanol. The pellet was washed twice with 70% ethanol and resuspended in elution buffer (1 mM Tris-Cl). Total RNA was treated with Turbo DNA-free to remove traces of genomic DNA contamination (Ambion). RNA integrity was assessed using a Bioanalyzer (Agilent Biotechnologies) and only samples with a RIN > 7 were used. | biotin | Labeling for Illumina Human6-v2 BeadArrays was performed according to manufacturer’s instructions. Briefly, the Illumina TotalPrep RNA Amplification Kit (Applied Biosystems, Foster City, CA) was used for a first and second strand reverse transcription step from 500 ng of total RNA. This was followed by an overnight in vitro transcription reaction that incorporates biotin-labeled nucleotides. 1.5 ug of biotin-labeled cRNA was mixed with an Illumina-supplied hybridization buffer containing several control oligonucleotides. | 9606 | Hybridization for Illumina Human6-v2 BeadArrays was performed according to manufacturer’s instructions. Labeled cRNA was hybridized to BeadArrays at 58°C for 18 hr. Washing, blocking, and streptavadin-Cy3 staining was performed out following manufacturer’s protocol. | BeadChips were scanned on the BeadArray Reader and scanned images were analyzed using BeadStudio software. | Transcript data was log2 transformed, and quantile normalized. | GPL6102 | Shengdar,,Tsai | North Carolina State University | 4700 Hillsborough St. | Raleigh | NC | 27604 | USA | NONE | 48701 | Reanalyzed by: GSE75010 | B | Control | F | 34 | spontaneous | placenta |
| GSM635932 | human.placenta.652 | GSM635932 | Public on Dec 10 2010 | Dec 07 2010 | Nov 13 2015 | RNA | 1 | human placenta | Homo sapiens | tissue: placenta | gender: M | classification: Control | gestational age: 36 | induction of labor: spontaneous | batch: B | total RNA | Total RNA was isolated from term human placenta using the Totally RNA kit (Ambion) following the manufacturer’s instructions with slight modifications. Briefly, homogenized tissue chilled in liquid nitrogen was lysed in 10 volumes of denaturation solution (200 mg tissue, 2 ml denaturation solution). The lysed sample was pre-cleared of bulk genomic DNA and cellular debris by spinning at 4,000 x g for 5 minutes. The supernatant was sequentially extracted with equal volumes phenol:chloroform, and acid phenol:chloroform (pH 4.5) using phase divider gels (Sigma), then precipitated with an equal volume of 100% isopropanol. The pellet was washed twice with 70% ethanol and resuspended in elution buffer (1 mM Tris-Cl). Total RNA was treated with Turbo DNA-free to remove traces of genomic DNA contamination (Ambion). RNA integrity was assessed using a Bioanalyzer (Agilent Biotechnologies) and only samples with a RIN > 7 were used. | biotin | Labeling for Illumina Human6-v2 BeadArrays was performed according to manufacturer’s instructions. Briefly, the Illumina TotalPrep RNA Amplification Kit (Applied Biosystems, Foster City, CA) was used for a first and second strand reverse transcription step from 500 ng of total RNA. This was followed by an overnight in vitro transcription reaction that incorporates biotin-labeled nucleotides. 1.5 ug of biotin-labeled cRNA was mixed with an Illumina-supplied hybridization buffer containing several control oligonucleotides. | 9606 | Hybridization for Illumina Human6-v2 BeadArrays was performed according to manufacturer’s instructions. Labeled cRNA was hybridized to BeadArrays at 58°C for 18 hr. Washing, blocking, and streptavadin-Cy3 staining was performed out following manufacturer’s protocol. | BeadChips were scanned on the BeadArray Reader and scanned images were analyzed using BeadStudio software. | Transcript data was log2 transformed, and quantile normalized. | GPL6102 | Shengdar,,Tsai | North Carolina State University | 4700 Hillsborough St. | Raleigh | NC | 27604 | USA | NONE | 48701 | Reanalyzed by: GSE75010 | B | Control | M | 36 | spontaneous | placenta |
| GSM635933 | human.placenta.010 | GSM635933 | Public on Dec 10 2010 | Dec 07 2010 | Nov 13 2015 | RNA | 1 | human placenta | Homo sapiens | tissue: placenta | gender: F | classification: preeclamptic | gestational age: 38 | induction of labor: spontaneous | batch: B | total RNA | Total RNA was isolated from term human placenta using the Totally RNA kit (Ambion) following the manufacturer’s instructions with slight modifications. Briefly, homogenized tissue chilled in liquid nitrogen was lysed in 10 volumes of denaturation solution (200 mg tissue, 2 ml denaturation solution). The lysed sample was pre-cleared of bulk genomic DNA and cellular debris by spinning at 4,000 x g for 5 minutes. The supernatant was sequentially extracted with equal volumes phenol:chloroform, and acid phenol:chloroform (pH 4.5) using phase divider gels (Sigma), then precipitated with an equal volume of 100% isopropanol. The pellet was washed twice with 70% ethanol and resuspended in elution buffer (1 mM Tris-Cl). Total RNA was treated with Turbo DNA-free to remove traces of genomic DNA contamination (Ambion). RNA integrity was assessed using a Bioanalyzer (Agilent Biotechnologies) and only samples with a RIN > 7 were used. | biotin | Labeling for Illumina Human6-v2 BeadArrays was performed according to manufacturer’s instructions. Briefly, the Illumina TotalPrep RNA Amplification Kit (Applied Biosystems, Foster City, CA) was used for a first and second strand reverse transcription step from 500 ng of total RNA. This was followed by an overnight in vitro transcription reaction that incorporates biotin-labeled nucleotides. 1.5 ug of biotin-labeled cRNA was mixed with an Illumina-supplied hybridization buffer containing several control oligonucleotides. | 9606 | Hybridization for Illumina Human6-v2 BeadArrays was performed according to manufacturer’s instructions. Labeled cRNA was hybridized to BeadArrays at 58°C for 18 hr. Washing, blocking, and streptavadin-Cy3 staining was performed out following manufacturer’s protocol. | BeadChips were scanned on the BeadArray Reader and scanned images were analyzed using BeadStudio software. | Transcript data was log2 transformed, and quantile normalized. | GPL6102 | Shengdar,,Tsai | North Carolina State University | 4700 Hillsborough St. | Raleigh | NC | 27604 | USA | NONE | 48701 | Reanalyzed by: GSE75010 | B | preeclamptic | F | 38 | spontaneous | placenta |
| GSM635934 | human.placenta.662 | GSM635934 | Public on Dec 10 2010 | Dec 07 2010 | Nov 13 2015 | RNA | 1 | human placenta | Homo sapiens | tissue: placenta | gender: M | classification: Control | gestational age: 39 | induction of labor: spontaneous | batch: B | total RNA | Total RNA was isolated from term human placenta using the Totally RNA kit (Ambion) following the manufacturer’s instructions with slight modifications. Briefly, homogenized tissue chilled in liquid nitrogen was lysed in 10 volumes of denaturation solution (200 mg tissue, 2 ml denaturation solution). The lysed sample was pre-cleared of bulk genomic DNA and cellular debris by spinning at 4,000 x g for 5 minutes. The supernatant was sequentially extracted with equal volumes phenol:chloroform, and acid phenol:chloroform (pH 4.5) using phase divider gels (Sigma), then precipitated with an equal volume of 100% isopropanol. The pellet was washed twice with 70% ethanol and resuspended in elution buffer (1 mM Tris-Cl). Total RNA was treated with Turbo DNA-free to remove traces of genomic DNA contamination (Ambion). RNA integrity was assessed using a Bioanalyzer (Agilent Biotechnologies) and only samples with a RIN > 7 were used. | biotin | Labeling for Illumina Human6-v2 BeadArrays was performed according to manufacturer’s instructions. Briefly, the Illumina TotalPrep RNA Amplification Kit (Applied Biosystems, Foster City, CA) was used for a first and second strand reverse transcription step from 500 ng of total RNA. This was followed by an overnight in vitro transcription reaction that incorporates biotin-labeled nucleotides. 1.5 ug of biotin-labeled cRNA was mixed with an Illumina-supplied hybridization buffer containing several control oligonucleotides. | 9606 | Hybridization for Illumina Human6-v2 BeadArrays was performed according to manufacturer’s instructions. Labeled cRNA was hybridized to BeadArrays at 58°C for 18 hr. Washing, blocking, and streptavadin-Cy3 staining was performed out following manufacturer’s protocol. | BeadChips were scanned on the BeadArray Reader and scanned images were analyzed using BeadStudio software. | Transcript data was log2 transformed, and quantile normalized. | GPL6102 | Shengdar,,Tsai | North Carolina State University | 4700 Hillsborough St. | Raleigh | NC | 27604 | USA | NONE | 48701 | Reanalyzed by: GSE75010 | B | Control | M | 39 | spontaneous | placenta |
| GSM635935 | human.placenta.674 | GSM635935 | Public on Dec 10 2010 | Dec 07 2010 | Nov 13 2015 | RNA | 1 | human placenta | Homo sapiens | tissue: placenta | gender: M | classification: Control | gestational age: 38 | induction of labor: spontaneous | batch: B | total RNA | Total RNA was isolated from term human placenta using the Totally RNA kit (Ambion) following the manufacturer’s instructions with slight modifications. Briefly, homogenized tissue chilled in liquid nitrogen was lysed in 10 volumes of denaturation solution (200 mg tissue, 2 ml denaturation solution). The lysed sample was pre-cleared of bulk genomic DNA and cellular debris by spinning at 4,000 x g for 5 minutes. The supernatant was sequentially extracted with equal volumes phenol:chloroform, and acid phenol:chloroform (pH 4.5) using phase divider gels (Sigma), then precipitated with an equal volume of 100% isopropanol. The pellet was washed twice with 70% ethanol and resuspended in elution buffer (1 mM Tris-Cl). Total RNA was treated with Turbo DNA-free to remove traces of genomic DNA contamination (Ambion). RNA integrity was assessed using a Bioanalyzer (Agilent Biotechnologies) and only samples with a RIN > 7 were used. | biotin | Labeling for Illumina Human6-v2 BeadArrays was performed according to manufacturer’s instructions. Briefly, the Illumina TotalPrep RNA Amplification Kit (Applied Biosystems, Foster City, CA) was used for a first and second strand reverse transcription step from 500 ng of total RNA. This was followed by an overnight in vitro transcription reaction that incorporates biotin-labeled nucleotides. 1.5 ug of biotin-labeled cRNA was mixed with an Illumina-supplied hybridization buffer containing several control oligonucleotides. | 9606 | Hybridization for Illumina Human6-v2 BeadArrays was performed according to manufacturer’s instructions. Labeled cRNA was hybridized to BeadArrays at 58°C for 18 hr. Washing, blocking, and streptavadin-Cy3 staining was performed out following manufacturer’s protocol. | BeadChips were scanned on the BeadArray Reader and scanned images were analyzed using BeadStudio software. | Transcript data was log2 transformed, and quantile normalized. | GPL6102 | Shengdar,,Tsai | North Carolina State University | 4700 Hillsborough St. | Raleigh | NC | 27604 | USA | NONE | 48701 | Reanalyzed by: GSE75010 | B | Control | M | 38 | spontaneous | placenta |
| GSM635936 | human.placenta.682 | GSM635936 | Public on Dec 10 2010 | Dec 07 2010 | Nov 13 2015 | RNA | 1 | human placenta | Homo sapiens | tissue: placenta | gender: F | classification: Control | gestational age: 35 | induction of labor: spontaneous | batch: B | total RNA | Total RNA was isolated from term human placenta using the Totally RNA kit (Ambion) following the manufacturer’s instructions with slight modifications. Briefly, homogenized tissue chilled in liquid nitrogen was lysed in 10 volumes of denaturation solution (200 mg tissue, 2 ml denaturation solution). The lysed sample was pre-cleared of bulk genomic DNA and cellular debris by spinning at 4,000 x g for 5 minutes. The supernatant was sequentially extracted with equal volumes phenol:chloroform, and acid phenol:chloroform (pH 4.5) using phase divider gels (Sigma), then precipitated with an equal volume of 100% isopropanol. The pellet was washed twice with 70% ethanol and resuspended in elution buffer (1 mM Tris-Cl). Total RNA was treated with Turbo DNA-free to remove traces of genomic DNA contamination (Ambion). RNA integrity was assessed using a Bioanalyzer (Agilent Biotechnologies) and only samples with a RIN > 7 were used. | biotin | Labeling for Illumina Human6-v2 BeadArrays was performed according to manufacturer’s instructions. Briefly, the Illumina TotalPrep RNA Amplification Kit (Applied Biosystems, Foster City, CA) was used for a first and second strand reverse transcription step from 500 ng of total RNA. This was followed by an overnight in vitro transcription reaction that incorporates biotin-labeled nucleotides. 1.5 ug of biotin-labeled cRNA was mixed with an Illumina-supplied hybridization buffer containing several control oligonucleotides. | 9606 | Hybridization for Illumina Human6-v2 BeadArrays was performed according to manufacturer’s instructions. Labeled cRNA was hybridized to BeadArrays at 58°C for 18 hr. Washing, blocking, and streptavadin-Cy3 staining was performed out following manufacturer’s protocol. | BeadChips were scanned on the BeadArray Reader and scanned images were analyzed using BeadStudio software. | Transcript data was log2 transformed, and quantile normalized. | GPL6102 | Shengdar,,Tsai | North Carolina State University | 4700 Hillsborough St. | Raleigh | NC | 27604 | USA | NONE | 48701 | Reanalyzed by: GSE75010 | B | Control | F | 35 | spontaneous | placenta |
| GSM635937 | human.placenta.014 | GSM635937 | Public on Dec 10 2010 | Dec 07 2010 | Nov 13 2015 | RNA | 1 | human placenta | Homo sapiens | tissue: placenta | gender: M | classification: preeclamptic | gestational age: 29 | induction of labor: induced | batch: B | total RNA | Total RNA was isolated from term human placenta using the Totally RNA kit (Ambion) following the manufacturer’s instructions with slight modifications. Briefly, homogenized tissue chilled in liquid nitrogen was lysed in 10 volumes of denaturation solution (200 mg tissue, 2 ml denaturation solution). The lysed sample was pre-cleared of bulk genomic DNA and cellular debris by spinning at 4,000 x g for 5 minutes. The supernatant was sequentially extracted with equal volumes phenol:chloroform, and acid phenol:chloroform (pH 4.5) using phase divider gels (Sigma), then precipitated with an equal volume of 100% isopropanol. The pellet was washed twice with 70% ethanol and resuspended in elution buffer (1 mM Tris-Cl). Total RNA was treated with Turbo DNA-free to remove traces of genomic DNA contamination (Ambion). RNA integrity was assessed using a Bioanalyzer (Agilent Biotechnologies) and only samples with a RIN > 7 were used. | biotin | Labeling for Illumina Human6-v2 BeadArrays was performed according to manufacturer’s instructions. Briefly, the Illumina TotalPrep RNA Amplification Kit (Applied Biosystems, Foster City, CA) was used for a first and second strand reverse transcription step from 500 ng of total RNA. This was followed by an overnight in vitro transcription reaction that incorporates biotin-labeled nucleotides. 1.5 ug of biotin-labeled cRNA was mixed with an Illumina-supplied hybridization buffer containing several control oligonucleotides. | 9606 | Hybridization for Illumina Human6-v2 BeadArrays was performed according to manufacturer’s instructions. Labeled cRNA was hybridized to BeadArrays at 58°C for 18 hr. Washing, blocking, and streptavadin-Cy3 staining was performed out following manufacturer’s protocol. | BeadChips were scanned on the BeadArray Reader and scanned images were analyzed using BeadStudio software. | Transcript data was log2 transformed, and quantile normalized. | GPL6102 | Shengdar,,Tsai | North Carolina State University | 4700 Hillsborough St. | Raleigh | NC | 27604 | USA | NONE | 48701 | Reanalyzed by: GSE75010 | B | preeclamptic | M | 29 | induced | placenta |
| GSM635938 | human.placenta.687 | GSM635938 | Public on Dec 10 2010 | Dec 07 2010 | Nov 13 2015 | RNA | 1 | human placenta | Homo sapiens | tissue: placenta | gender: M | classification: Control | gestational age: 36 | induction of labor: spontaneous | batch: B | total RNA | Total RNA was isolated from term human placenta using the Totally RNA kit (Ambion) following the manufacturer’s instructions with slight modifications. Briefly, homogenized tissue chilled in liquid nitrogen was lysed in 10 volumes of denaturation solution (200 mg tissue, 2 ml denaturation solution). The lysed sample was pre-cleared of bulk genomic DNA and cellular debris by spinning at 4,000 x g for 5 minutes. The supernatant was sequentially extracted with equal volumes phenol:chloroform, and acid phenol:chloroform (pH 4.5) using phase divider gels (Sigma), then precipitated with an equal volume of 100% isopropanol. The pellet was washed twice with 70% ethanol and resuspended in elution buffer (1 mM Tris-Cl). Total RNA was treated with Turbo DNA-free to remove traces of genomic DNA contamination (Ambion). RNA integrity was assessed using a Bioanalyzer (Agilent Biotechnologies) and only samples with a RIN > 7 were used. | biotin | Labeling for Illumina Human6-v2 BeadArrays was performed according to manufacturer’s instructions. Briefly, the Illumina TotalPrep RNA Amplification Kit (Applied Biosystems, Foster City, CA) was used for a first and second strand reverse transcription step from 500 ng of total RNA. This was followed by an overnight in vitro transcription reaction that incorporates biotin-labeled nucleotides. 1.5 ug of biotin-labeled cRNA was mixed with an Illumina-supplied hybridization buffer containing several control oligonucleotides. | 9606 | Hybridization for Illumina Human6-v2 BeadArrays was performed according to manufacturer’s instructions. Labeled cRNA was hybridized to BeadArrays at 58°C for 18 hr. Washing, blocking, and streptavadin-Cy3 staining was performed out following manufacturer’s protocol. | BeadChips were scanned on the BeadArray Reader and scanned images were analyzed using BeadStudio software. | Transcript data was log2 transformed, and quantile normalized. | GPL6102 | Shengdar,,Tsai | North Carolina State University | 4700 Hillsborough St. | Raleigh | NC | 27604 | USA | NONE | 48701 | Reanalyzed by: GSE75010 | B | Control | M | 36 | spontaneous | placenta |
| GSM635939 | human.placenta.693 | GSM635939 | Public on Dec 10 2010 | Dec 07 2010 | Nov 13 2015 | RNA | 1 | human placenta | Homo sapiens | tissue: placenta | gender: M | classification: Control | gestational age: 39 | induction of labor: spontaneous | batch: B | total RNA | Total RNA was isolated from term human placenta using the Totally RNA kit (Ambion) following the manufacturer’s instructions with slight modifications. Briefly, homogenized tissue chilled in liquid nitrogen was lysed in 10 volumes of denaturation solution (200 mg tissue, 2 ml denaturation solution). The lysed sample was pre-cleared of bulk genomic DNA and cellular debris by spinning at 4,000 x g for 5 minutes. The supernatant was sequentially extracted with equal volumes phenol:chloroform, and acid phenol:chloroform (pH 4.5) using phase divider gels (Sigma), then precipitated with an equal volume of 100% isopropanol. The pellet was washed twice with 70% ethanol and resuspended in elution buffer (1 mM Tris-Cl). Total RNA was treated with Turbo DNA-free to remove traces of genomic DNA contamination (Ambion). RNA integrity was assessed using a Bioanalyzer (Agilent Biotechnologies) and only samples with a RIN > 7 were used. | biotin | Labeling for Illumina Human6-v2 BeadArrays was performed according to manufacturer’s instructions. Briefly, the Illumina TotalPrep RNA Amplification Kit (Applied Biosystems, Foster City, CA) was used for a first and second strand reverse transcription step from 500 ng of total RNA. This was followed by an overnight in vitro transcription reaction that incorporates biotin-labeled nucleotides. 1.5 ug of biotin-labeled cRNA was mixed with an Illumina-supplied hybridization buffer containing several control oligonucleotides. | 9606 | Hybridization for Illumina Human6-v2 BeadArrays was performed according to manufacturer’s instructions. Labeled cRNA was hybridized to BeadArrays at 58°C for 18 hr. Washing, blocking, and streptavadin-Cy3 staining was performed out following manufacturer’s protocol. | BeadChips were scanned on the BeadArray Reader and scanned images were analyzed using BeadStudio software. | Transcript data was log2 transformed, and quantile normalized. | GPL6102 | Shengdar,,Tsai | North Carolina State University | 4700 Hillsborough St. | Raleigh | NC | 27604 | USA | NONE | 48701 | Reanalyzed by: GSE75010 | B | Control | M | 39 | spontaneous | placenta |
| GSM635940 | human.placenta.020 | GSM635940 | Public on Dec 10 2010 | Dec 07 2010 | Nov 13 2015 | RNA | 1 | human placenta | Homo sapiens | tissue: placenta | gender: F | classification: preeclamptic | gestational age: 28 | induction of labor: induced | batch: B | total RNA | Total RNA was isolated from term human placenta using the Totally RNA kit (Ambion) following the manufacturer’s instructions with slight modifications. Briefly, homogenized tissue chilled in liquid nitrogen was lysed in 10 volumes of denaturation solution (200 mg tissue, 2 ml denaturation solution). The lysed sample was pre-cleared of bulk genomic DNA and cellular debris by spinning at 4,000 x g for 5 minutes. The supernatant was sequentially extracted with equal volumes phenol:chloroform, and acid phenol:chloroform (pH 4.5) using phase divider gels (Sigma), then precipitated with an equal volume of 100% isopropanol. The pellet was washed twice with 70% ethanol and resuspended in elution buffer (1 mM Tris-Cl). Total RNA was treated with Turbo DNA-free to remove traces of genomic DNA contamination (Ambion). RNA integrity was assessed using a Bioanalyzer (Agilent Biotechnologies) and only samples with a RIN > 7 were used. | biotin | Labeling for Illumina Human6-v2 BeadArrays was performed according to manufacturer’s instructions. Briefly, the Illumina TotalPrep RNA Amplification Kit (Applied Biosystems, Foster City, CA) was used for a first and second strand reverse transcription step from 500 ng of total RNA. This was followed by an overnight in vitro transcription reaction that incorporates biotin-labeled nucleotides. 1.5 ug of biotin-labeled cRNA was mixed with an Illumina-supplied hybridization buffer containing several control oligonucleotides. | 9606 | Hybridization for Illumina Human6-v2 BeadArrays was performed according to manufacturer’s instructions. Labeled cRNA was hybridized to BeadArrays at 58°C for 18 hr. Washing, blocking, and streptavadin-Cy3 staining was performed out following manufacturer’s protocol. | BeadChips were scanned on the BeadArray Reader and scanned images were analyzed using BeadStudio software. | Transcript data was log2 transformed, and quantile normalized. | GPL6102 | Shengdar,,Tsai | North Carolina State University | 4700 Hillsborough St. | Raleigh | NC | 27604 | USA | NONE | 48701 | Reanalyzed by: GSE75010 | B | preeclamptic | F | 28 | induced | placenta |
| GSM635941 | human.placenta.749 | GSM635941 | Public on Dec 10 2010 | Dec 07 2010 | Nov 13 2015 | RNA | 1 | human placenta | Homo sapiens | tissue: placenta | gender: M | classification: Control | gestational age: 39 | induction of labor: induced | batch: B | total RNA | Total RNA was isolated from term human placenta using the Totally RNA kit (Ambion) following the manufacturer’s instructions with slight modifications. Briefly, homogenized tissue chilled in liquid nitrogen was lysed in 10 volumes of denaturation solution (200 mg tissue, 2 ml denaturation solution). The lysed sample was pre-cleared of bulk genomic DNA and cellular debris by spinning at 4,000 x g for 5 minutes. The supernatant was sequentially extracted with equal volumes phenol:chloroform, and acid phenol:chloroform (pH 4.5) using phase divider gels (Sigma), then precipitated with an equal volume of 100% isopropanol. The pellet was washed twice with 70% ethanol and resuspended in elution buffer (1 mM Tris-Cl). Total RNA was treated with Turbo DNA-free to remove traces of genomic DNA contamination (Ambion). RNA integrity was assessed using a Bioanalyzer (Agilent Biotechnologies) and only samples with a RIN > 7 were used. | biotin | Labeling for Illumina Human6-v2 BeadArrays was performed according to manufacturer’s instructions. Briefly, the Illumina TotalPrep RNA Amplification Kit (Applied Biosystems, Foster City, CA) was used for a first and second strand reverse transcription step from 500 ng of total RNA. This was followed by an overnight in vitro transcription reaction that incorporates biotin-labeled nucleotides. 1.5 ug of biotin-labeled cRNA was mixed with an Illumina-supplied hybridization buffer containing several control oligonucleotides. | 9606 | Hybridization for Illumina Human6-v2 BeadArrays was performed according to manufacturer’s instructions. Labeled cRNA was hybridized to BeadArrays at 58°C for 18 hr. Washing, blocking, and streptavadin-Cy3 staining was performed out following manufacturer’s protocol. | BeadChips were scanned on the BeadArray Reader and scanned images were analyzed using BeadStudio software. | Transcript data was log2 transformed, and quantile normalized. | GPL6102 | Shengdar,,Tsai | North Carolina State University | 4700 Hillsborough St. | Raleigh | NC | 27604 | USA | NONE | 48701 | Reanalyzed by: GSE75010 | B | Control | M | 39 | induced | placenta |
| GSM635942 | human.placenta.751 | GSM635942 | Public on Dec 10 2010 | Dec 07 2010 | Nov 13 2015 | RNA | 1 | human placenta | Homo sapiens | tissue: placenta | gender: F | classification: Control | gestational age: 38 | induction of labor: spontaneous | batch: B | total RNA | Total RNA was isolated from term human placenta using the Totally RNA kit (Ambion) following the manufacturer’s instructions with slight modifications. Briefly, homogenized tissue chilled in liquid nitrogen was lysed in 10 volumes of denaturation solution (200 mg tissue, 2 ml denaturation solution). The lysed sample was pre-cleared of bulk genomic DNA and cellular debris by spinning at 4,000 x g for 5 minutes. The supernatant was sequentially extracted with equal volumes phenol:chloroform, and acid phenol:chloroform (pH 4.5) using phase divider gels (Sigma), then precipitated with an equal volume of 100% isopropanol. The pellet was washed twice with 70% ethanol and resuspended in elution buffer (1 mM Tris-Cl). Total RNA was treated with Turbo DNA-free to remove traces of genomic DNA contamination (Ambion). RNA integrity was assessed using a Bioanalyzer (Agilent Biotechnologies) and only samples with a RIN > 7 were used. | biotin | Labeling for Illumina Human6-v2 BeadArrays was performed according to manufacturer’s instructions. Briefly, the Illumina TotalPrep RNA Amplification Kit (Applied Biosystems, Foster City, CA) was used for a first and second strand reverse transcription step from 500 ng of total RNA. This was followed by an overnight in vitro transcription reaction that incorporates biotin-labeled nucleotides. 1.5 ug of biotin-labeled cRNA was mixed with an Illumina-supplied hybridization buffer containing several control oligonucleotides. | 9606 | Hybridization for Illumina Human6-v2 BeadArrays was performed according to manufacturer’s instructions. Labeled cRNA was hybridized to BeadArrays at 58°C for 18 hr. Washing, blocking, and streptavadin-Cy3 staining was performed out following manufacturer’s protocol. | BeadChips were scanned on the BeadArray Reader and scanned images were analyzed using BeadStudio software. | Transcript data was log2 transformed, and quantile normalized. | GPL6102 | Shengdar,,Tsai | North Carolina State University | 4700 Hillsborough St. | Raleigh | NC | 27604 | USA | NONE | 48701 | Reanalyzed by: GSE75010 | B | Control | F | 38 | spontaneous | placenta |
| GSM635943 | human.placenta.031 | GSM635943 | Public on Dec 10 2010 | Dec 07 2010 | Nov 13 2015 | RNA | 1 | human placenta | Homo sapiens | tissue: placenta | gender: F | classification: preeclamptic | gestational age: 32 | induction of labor: spontaneous | batch: B | total RNA | Total RNA was isolated from term human placenta using the Totally RNA kit (Ambion) following the manufacturer’s instructions with slight modifications. Briefly, homogenized tissue chilled in liquid nitrogen was lysed in 10 volumes of denaturation solution (200 mg tissue, 2 ml denaturation solution). The lysed sample was pre-cleared of bulk genomic DNA and cellular debris by spinning at 4,000 x g for 5 minutes. The supernatant was sequentially extracted with equal volumes phenol:chloroform, and acid phenol:chloroform (pH 4.5) using phase divider gels (Sigma), then precipitated with an equal volume of 100% isopropanol. The pellet was washed twice with 70% ethanol and resuspended in elution buffer (1 mM Tris-Cl). Total RNA was treated with Turbo DNA-free to remove traces of genomic DNA contamination (Ambion). RNA integrity was assessed using a Bioanalyzer (Agilent Biotechnologies) and only samples with a RIN > 7 were used. | biotin | Labeling for Illumina Human6-v2 BeadArrays was performed according to manufacturer’s instructions. Briefly, the Illumina TotalPrep RNA Amplification Kit (Applied Biosystems, Foster City, CA) was used for a first and second strand reverse transcription step from 500 ng of total RNA. This was followed by an overnight in vitro transcription reaction that incorporates biotin-labeled nucleotides. 1.5 ug of biotin-labeled cRNA was mixed with an Illumina-supplied hybridization buffer containing several control oligonucleotides. | 9606 | Hybridization for Illumina Human6-v2 BeadArrays was performed according to manufacturer’s instructions. Labeled cRNA was hybridized to BeadArrays at 58°C for 18 hr. Washing, blocking, and streptavadin-Cy3 staining was performed out following manufacturer’s protocol. | BeadChips were scanned on the BeadArray Reader and scanned images were analyzed using BeadStudio software. | Transcript data was log2 transformed, and quantile normalized. | GPL6102 | Shengdar,,Tsai | North Carolina State University | 4700 Hillsborough St. | Raleigh | NC | 27604 | USA | NONE | 48701 | Reanalyzed by: GSE75010 | B | preeclamptic | F | 32 | spontaneous | placenta |
| GSM635944 | human.placenta.756 | GSM635944 | Public on Dec 10 2010 | Dec 07 2010 | Nov 13 2015 | RNA | 1 | human placenta | Homo sapiens | tissue: placenta | gender: F | classification: Control | gestational age: 39 | induction of labor: spontaneous | batch: B | total RNA | Total RNA was isolated from term human placenta using the Totally RNA kit (Ambion) following the manufacturer’s instructions with slight modifications. Briefly, homogenized tissue chilled in liquid nitrogen was lysed in 10 volumes of denaturation solution (200 mg tissue, 2 ml denaturation solution). The lysed sample was pre-cleared of bulk genomic DNA and cellular debris by spinning at 4,000 x g for 5 minutes. The supernatant was sequentially extracted with equal volumes phenol:chloroform, and acid phenol:chloroform (pH 4.5) using phase divider gels (Sigma), then precipitated with an equal volume of 100% isopropanol. The pellet was washed twice with 70% ethanol and resuspended in elution buffer (1 mM Tris-Cl). Total RNA was treated with Turbo DNA-free to remove traces of genomic DNA contamination (Ambion). RNA integrity was assessed using a Bioanalyzer (Agilent Biotechnologies) and only samples with a RIN > 7 were used. | biotin | Labeling for Illumina Human6-v2 BeadArrays was performed according to manufacturer’s instructions. Briefly, the Illumina TotalPrep RNA Amplification Kit (Applied Biosystems, Foster City, CA) was used for a first and second strand reverse transcription step from 500 ng of total RNA. This was followed by an overnight in vitro transcription reaction that incorporates biotin-labeled nucleotides. 1.5 ug of biotin-labeled cRNA was mixed with an Illumina-supplied hybridization buffer containing several control oligonucleotides. | 9606 | Hybridization for Illumina Human6-v2 BeadArrays was performed according to manufacturer’s instructions. Labeled cRNA was hybridized to BeadArrays at 58°C for 18 hr. Washing, blocking, and streptavadin-Cy3 staining was performed out following manufacturer’s protocol. | BeadChips were scanned on the BeadArray Reader and scanned images were analyzed using BeadStudio software. | Transcript data was log2 transformed, and quantile normalized. | GPL6102 | Shengdar,,Tsai | North Carolina State University | 4700 Hillsborough St. | Raleigh | NC | 27604 | USA | NONE | 48701 | Reanalyzed by: GSE75010 | B | Control | F | 39 | spontaneous | placenta |
| GSM635945 | human.placenta.045 | GSM635945 | Public on Dec 10 2010 | Dec 07 2010 | Nov 13 2015 | RNA | 1 | human placenta | Homo sapiens | tissue: placenta | gender: M | classification: preeclamptic | gestational age: 34 | induction of labor: spontaneous | batch: B | total RNA | Total RNA was isolated from term human placenta using the Totally RNA kit (Ambion) following the manufacturer’s instructions with slight modifications. Briefly, homogenized tissue chilled in liquid nitrogen was lysed in 10 volumes of denaturation solution (200 mg tissue, 2 ml denaturation solution). The lysed sample was pre-cleared of bulk genomic DNA and cellular debris by spinning at 4,000 x g for 5 minutes. The supernatant was sequentially extracted with equal volumes phenol:chloroform, and acid phenol:chloroform (pH 4.5) using phase divider gels (Sigma), then precipitated with an equal volume of 100% isopropanol. The pellet was washed twice with 70% ethanol and resuspended in elution buffer (1 mM Tris-Cl). Total RNA was treated with Turbo DNA-free to remove traces of genomic DNA contamination (Ambion). RNA integrity was assessed using a Bioanalyzer (Agilent Biotechnologies) and only samples with a RIN > 7 were used. | biotin | Labeling for Illumina Human6-v2 BeadArrays was performed according to manufacturer’s instructions. Briefly, the Illumina TotalPrep RNA Amplification Kit (Applied Biosystems, Foster City, CA) was used for a first and second strand reverse transcription step from 500 ng of total RNA. This was followed by an overnight in vitro transcription reaction that incorporates biotin-labeled nucleotides. 1.5 ug of biotin-labeled cRNA was mixed with an Illumina-supplied hybridization buffer containing several control oligonucleotides. | 9606 | Hybridization for Illumina Human6-v2 BeadArrays was performed according to manufacturer’s instructions. Labeled cRNA was hybridized to BeadArrays at 58°C for 18 hr. Washing, blocking, and streptavadin-Cy3 staining was performed out following manufacturer’s protocol. | BeadChips were scanned on the BeadArray Reader and scanned images were analyzed using BeadStudio software. | Transcript data was log2 transformed, and quantile normalized. | GPL6102 | Shengdar,,Tsai | North Carolina State University | 4700 Hillsborough St. | Raleigh | NC | 27604 | USA | NONE | 48701 | Reanalyzed by: GSE75010 | B | preeclamptic | M | 34 | spontaneous | placenta |
| GSM635946 | human.placenta.798 | GSM635946 | Public on Dec 10 2010 | Dec 07 2010 | Nov 13 2015 | RNA | 1 | human placenta | Homo sapiens | tissue: placenta | gender: M | classification: Control | gestational age: 38 | induction of labor: spontaneous | batch: B | total RNA | Total RNA was isolated from term human placenta using the Totally RNA kit (Ambion) following the manufacturer’s instructions with slight modifications. Briefly, homogenized tissue chilled in liquid nitrogen was lysed in 10 volumes of denaturation solution (200 mg tissue, 2 ml denaturation solution). The lysed sample was pre-cleared of bulk genomic DNA and cellular debris by spinning at 4,000 x g for 5 minutes. The supernatant was sequentially extracted with equal volumes phenol:chloroform, and acid phenol:chloroform (pH 4.5) using phase divider gels (Sigma), then precipitated with an equal volume of 100% isopropanol. The pellet was washed twice with 70% ethanol and resuspended in elution buffer (1 mM Tris-Cl). Total RNA was treated with Turbo DNA-free to remove traces of genomic DNA contamination (Ambion). RNA integrity was assessed using a Bioanalyzer (Agilent Biotechnologies) and only samples with a RIN > 7 were used. | biotin | Labeling for Illumina Human6-v2 BeadArrays was performed according to manufacturer’s instructions. Briefly, the Illumina TotalPrep RNA Amplification Kit (Applied Biosystems, Foster City, CA) was used for a first and second strand reverse transcription step from 500 ng of total RNA. This was followed by an overnight in vitro transcription reaction that incorporates biotin-labeled nucleotides. 1.5 ug of biotin-labeled cRNA was mixed with an Illumina-supplied hybridization buffer containing several control oligonucleotides. | 9606 | Hybridization for Illumina Human6-v2 BeadArrays was performed according to manufacturer’s instructions. Labeled cRNA was hybridized to BeadArrays at 58°C for 18 hr. Washing, blocking, and streptavadin-Cy3 staining was performed out following manufacturer’s protocol. | BeadChips were scanned on the BeadArray Reader and scanned images were analyzed using BeadStudio software. | Transcript data was log2 transformed, and quantile normalized. | GPL6102 | Shengdar,,Tsai | North Carolina State University | 4700 Hillsborough St. | Raleigh | NC | 27604 | USA | NONE | 48701 | Reanalyzed by: GSE75010 | B | Control | M | 38 | spontaneous | placenta |
| GSM635947 | human.placenta.047 | GSM635947 | Public on Dec 10 2010 | Dec 07 2010 | Nov 13 2015 | RNA | 1 | human placenta | Homo sapiens | tissue: placenta | gender: F | classification: preeclamptic | gestational age: 33 | induction of labor: induced | batch: B | total RNA | Total RNA was isolated from term human placenta using the Totally RNA kit (Ambion) following the manufacturer’s instructions with slight modifications. Briefly, homogenized tissue chilled in liquid nitrogen was lysed in 10 volumes of denaturation solution (200 mg tissue, 2 ml denaturation solution). The lysed sample was pre-cleared of bulk genomic DNA and cellular debris by spinning at 4,000 x g for 5 minutes. The supernatant was sequentially extracted with equal volumes phenol:chloroform, and acid phenol:chloroform (pH 4.5) using phase divider gels (Sigma), then precipitated with an equal volume of 100% isopropanol. The pellet was washed twice with 70% ethanol and resuspended in elution buffer (1 mM Tris-Cl). Total RNA was treated with Turbo DNA-free to remove traces of genomic DNA contamination (Ambion). RNA integrity was assessed using a Bioanalyzer (Agilent Biotechnologies) and only samples with a RIN > 7 were used. | biotin | Labeling for Illumina Human6-v2 BeadArrays was performed according to manufacturer’s instructions. Briefly, the Illumina TotalPrep RNA Amplification Kit (Applied Biosystems, Foster City, CA) was used for a first and second strand reverse transcription step from 500 ng of total RNA. This was followed by an overnight in vitro transcription reaction that incorporates biotin-labeled nucleotides. 1.5 ug of biotin-labeled cRNA was mixed with an Illumina-supplied hybridization buffer containing several control oligonucleotides. | 9606 | Hybridization for Illumina Human6-v2 BeadArrays was performed according to manufacturer’s instructions. Labeled cRNA was hybridized to BeadArrays at 58°C for 18 hr. Washing, blocking, and streptavadin-Cy3 staining was performed out following manufacturer’s protocol. | BeadChips were scanned on the BeadArray Reader and scanned images were analyzed using BeadStudio software. | Transcript data was log2 transformed, and quantile normalized. | GPL6102 | Shengdar,,Tsai | North Carolina State University | 4700 Hillsborough St. | Raleigh | NC | 27604 | USA | NONE | 48701 | Reanalyzed by: GSE75010 | B | preeclamptic | F | 33 | induced | placenta |
| GSM635948 | human.placenta.801 | GSM635948 | Public on Dec 10 2010 | Dec 07 2010 | Nov 13 2015 | RNA | 1 | human placenta | Homo sapiens | tissue: placenta | gender: M | classification: Control | gestational age: 29 | induction of labor: spontaneous | batch: B | total RNA | Total RNA was isolated from term human placenta using the Totally RNA kit (Ambion) following the manufacturer’s instructions with slight modifications. Briefly, homogenized tissue chilled in liquid nitrogen was lysed in 10 volumes of denaturation solution (200 mg tissue, 2 ml denaturation solution). The lysed sample was pre-cleared of bulk genomic DNA and cellular debris by spinning at 4,000 x g for 5 minutes. The supernatant was sequentially extracted with equal volumes phenol:chloroform, and acid phenol:chloroform (pH 4.5) using phase divider gels (Sigma), then precipitated with an equal volume of 100% isopropanol. The pellet was washed twice with 70% ethanol and resuspended in elution buffer (1 mM Tris-Cl). Total RNA was treated with Turbo DNA-free to remove traces of genomic DNA contamination (Ambion). RNA integrity was assessed using a Bioanalyzer (Agilent Biotechnologies) and only samples with a RIN > 7 were used. | biotin | Labeling for Illumina Human6-v2 BeadArrays was performed according to manufacturer’s instructions. Briefly, the Illumina TotalPrep RNA Amplification Kit (Applied Biosystems, Foster City, CA) was used for a first and second strand reverse transcription step from 500 ng of total RNA. This was followed by an overnight in vitro transcription reaction that incorporates biotin-labeled nucleotides. 1.5 ug of biotin-labeled cRNA was mixed with an Illumina-supplied hybridization buffer containing several control oligonucleotides. | 9606 | Hybridization for Illumina Human6-v2 BeadArrays was performed according to manufacturer’s instructions. Labeled cRNA was hybridized to BeadArrays at 58°C for 18 hr. Washing, blocking, and streptavadin-Cy3 staining was performed out following manufacturer’s protocol. | BeadChips were scanned on the BeadArray Reader and scanned images were analyzed using BeadStudio software. | Transcript data was log2 transformed, and quantile normalized. | GPL6102 | Shengdar,,Tsai | North Carolina State University | 4700 Hillsborough St. | Raleigh | NC | 27604 | USA | NONE | 48701 | Reanalyzed by: GSE75010 | B | Control | M | 29 | spontaneous | placenta |
| GSM635949 | human.placenta.617 | GSM635949 | Public on Dec 10 2010 | Dec 07 2010 | Nov 13 2015 | RNA | 1 | human placenta | Homo sapiens | tissue: placenta | gender: F | classification: Control | gestational age: 40 | induction of labor: induced | batch: B | total RNA | Total RNA was isolated from term human placenta using the Totally RNA kit (Ambion) following the manufacturer’s instructions with slight modifications. Briefly, homogenized tissue chilled in liquid nitrogen was lysed in 10 volumes of denaturation solution (200 mg tissue, 2 ml denaturation solution). The lysed sample was pre-cleared of bulk genomic DNA and cellular debris by spinning at 4,000 x g for 5 minutes. The supernatant was sequentially extracted with equal volumes phenol:chloroform, and acid phenol:chloroform (pH 4.5) using phase divider gels (Sigma), then precipitated with an equal volume of 100% isopropanol. The pellet was washed twice with 70% ethanol and resuspended in elution buffer (1 mM Tris-Cl). Total RNA was treated with Turbo DNA-free to remove traces of genomic DNA contamination (Ambion). RNA integrity was assessed using a Bioanalyzer (Agilent Biotechnologies) and only samples with a RIN > 7 were used. | biotin | Labeling for Illumina Human6-v2 BeadArrays was performed according to manufacturer’s instructions. Briefly, the Illumina TotalPrep RNA Amplification Kit (Applied Biosystems, Foster City, CA) was used for a first and second strand reverse transcription step from 500 ng of total RNA. This was followed by an overnight in vitro transcription reaction that incorporates biotin-labeled nucleotides. 1.5 ug of biotin-labeled cRNA was mixed with an Illumina-supplied hybridization buffer containing several control oligonucleotides. | 9606 | Hybridization for Illumina Human6-v2 BeadArrays was performed according to manufacturer’s instructions. Labeled cRNA was hybridized to BeadArrays at 58°C for 18 hr. Washing, blocking, and streptavadin-Cy3 staining was performed out following manufacturer’s protocol. | BeadChips were scanned on the BeadArray Reader and scanned images were analyzed using BeadStudio software. | Transcript data was log2 transformed, and quantile normalized. | GPL6102 | Shengdar,,Tsai | North Carolina State University | 4700 Hillsborough St. | Raleigh | NC | 27604 | USA | NONE | 48701 | Reanalyzed by: GSE75010 | B | Control | F | 40 | induced | placenta |
| GSM635950 | human.placenta.625 | GSM635950 | Public on Dec 10 2010 | Dec 07 2010 | Nov 13 2015 | RNA | 1 | human placenta | Homo sapiens | tissue: placenta | gender: F | classification: Control | gestational age: 39 | induction of labor: spontaneous | batch: B | total RNA | Total RNA was isolated from term human placenta using the Totally RNA kit (Ambion) following the manufacturer’s instructions with slight modifications. Briefly, homogenized tissue chilled in liquid nitrogen was lysed in 10 volumes of denaturation solution (200 mg tissue, 2 ml denaturation solution). The lysed sample was pre-cleared of bulk genomic DNA and cellular debris by spinning at 4,000 x g for 5 minutes. The supernatant was sequentially extracted with equal volumes phenol:chloroform, and acid phenol:chloroform (pH 4.5) using phase divider gels (Sigma), then precipitated with an equal volume of 100% isopropanol. The pellet was washed twice with 70% ethanol and resuspended in elution buffer (1 mM Tris-Cl). Total RNA was treated with Turbo DNA-free to remove traces of genomic DNA contamination (Ambion). RNA integrity was assessed using a Bioanalyzer (Agilent Biotechnologies) and only samples with a RIN > 7 were used. | biotin | Labeling for Illumina Human6-v2 BeadArrays was performed according to manufacturer’s instructions. Briefly, the Illumina TotalPrep RNA Amplification Kit (Applied Biosystems, Foster City, CA) was used for a first and second strand reverse transcription step from 500 ng of total RNA. This was followed by an overnight in vitro transcription reaction that incorporates biotin-labeled nucleotides. 1.5 ug of biotin-labeled cRNA was mixed with an Illumina-supplied hybridization buffer containing several control oligonucleotides. | 9606 | Hybridization for Illumina Human6-v2 BeadArrays was performed according to manufacturer’s instructions. Labeled cRNA was hybridized to BeadArrays at 58°C for 18 hr. Washing, blocking, and streptavadin-Cy3 staining was performed out following manufacturer’s protocol. | BeadChips were scanned on the BeadArray Reader and scanned images were analyzed using BeadStudio software. | Transcript data was log2 transformed, and quantile normalized. | GPL6102 | Shengdar,,Tsai | North Carolina State University | 4700 Hillsborough St. | Raleigh | NC | 27604 | USA | NONE | 48701 | Reanalyzed by: GSE75010 | B | Control | F | 39 | spontaneous | placenta |
| GSM635951 | human.placenta.005 | GSM635951 | Public on Dec 10 2010 | Dec 07 2010 | Nov 13 2015 | RNA | 1 | human placenta | Homo sapiens | tissue: placenta | gender: F | classification: preeclamptic | gestational age: 27 | induction of labor: induced | batch: B | total RNA | Total RNA was isolated from term human placenta using the Totally RNA kit (Ambion) following the manufacturer’s instructions with slight modifications. Briefly, homogenized tissue chilled in liquid nitrogen was lysed in 10 volumes of denaturation solution (200 mg tissue, 2 ml denaturation solution). The lysed sample was pre-cleared of bulk genomic DNA and cellular debris by spinning at 4,000 x g for 5 minutes. The supernatant was sequentially extracted with equal volumes phenol:chloroform, and acid phenol:chloroform (pH 4.5) using phase divider gels (Sigma), then precipitated with an equal volume of 100% isopropanol. The pellet was washed twice with 70% ethanol and resuspended in elution buffer (1 mM Tris-Cl). Total RNA was treated with Turbo DNA-free to remove traces of genomic DNA contamination (Ambion). RNA integrity was assessed using a Bioanalyzer (Agilent Biotechnologies) and only samples with a RIN > 7 were used. | biotin | Labeling for Illumina Human6-v2 BeadArrays was performed according to manufacturer’s instructions. Briefly, the Illumina TotalPrep RNA Amplification Kit (Applied Biosystems, Foster City, CA) was used for a first and second strand reverse transcription step from 500 ng of total RNA. This was followed by an overnight in vitro transcription reaction that incorporates biotin-labeled nucleotides. 1.5 ug of biotin-labeled cRNA was mixed with an Illumina-supplied hybridization buffer containing several control oligonucleotides. | 9606 | Hybridization for Illumina Human6-v2 BeadArrays was performed according to manufacturer’s instructions. Labeled cRNA was hybridized to BeadArrays at 58°C for 18 hr. Washing, blocking, and streptavadin-Cy3 staining was performed out following manufacturer’s protocol. | BeadChips were scanned on the BeadArray Reader and scanned images were analyzed using BeadStudio software. | Transcript data was log2 transformed, and quantile normalized. | GPL6102 | Shengdar,,Tsai | North Carolina State University | 4700 Hillsborough St. | Raleigh | NC | 27604 | USA | NONE | 48701 | Reanalyzed by: GSE75010 | B | preeclamptic | F | 27 | induced | placenta |
| GSM635952 | human.placenta.626 | GSM635952 | Public on Dec 10 2010 | Dec 07 2010 | Nov 13 2015 | RNA | 1 | human placenta | Homo sapiens | tissue: placenta | gender: M | classification: Control | gestational age: 38 | induction of labor: spontaneous | batch: B | total RNA | Total RNA was isolated from term human placenta using the Totally RNA kit (Ambion) following the manufacturer’s instructions with slight modifications. Briefly, homogenized tissue chilled in liquid nitrogen was lysed in 10 volumes of denaturation solution (200 mg tissue, 2 ml denaturation solution). The lysed sample was pre-cleared of bulk genomic DNA and cellular debris by spinning at 4,000 x g for 5 minutes. The supernatant was sequentially extracted with equal volumes phenol:chloroform, and acid phenol:chloroform (pH 4.5) using phase divider gels (Sigma), then precipitated with an equal volume of 100% isopropanol. The pellet was washed twice with 70% ethanol and resuspended in elution buffer (1 mM Tris-Cl). Total RNA was treated with Turbo DNA-free to remove traces of genomic DNA contamination (Ambion). RNA integrity was assessed using a Bioanalyzer (Agilent Biotechnologies) and only samples with a RIN > 7 were used. | biotin | Labeling for Illumina Human6-v2 BeadArrays was performed according to manufacturer’s instructions. Briefly, the Illumina TotalPrep RNA Amplification Kit (Applied Biosystems, Foster City, CA) was used for a first and second strand reverse transcription step from 500 ng of total RNA. This was followed by an overnight in vitro transcription reaction that incorporates biotin-labeled nucleotides. 1.5 ug of biotin-labeled cRNA was mixed with an Illumina-supplied hybridization buffer containing several control oligonucleotides. | 9606 | Hybridization for Illumina Human6-v2 BeadArrays was performed according to manufacturer’s instructions. Labeled cRNA was hybridized to BeadArrays at 58°C for 18 hr. Washing, blocking, and streptavadin-Cy3 staining was performed out following manufacturer’s protocol. | BeadChips were scanned on the BeadArray Reader and scanned images were analyzed using BeadStudio software. | Transcript data was log2 transformed, and quantile normalized. | GPL6102 | Shengdar,,Tsai | North Carolina State University | 4700 Hillsborough St. | Raleigh | NC | 27604 | USA | NONE | 48701 | Reanalyzed by: GSE75010 | B | Control | M | 38 | spontaneous | placenta |
| GSM635953 | human.placenta.623 | GSM635953 | Public on Dec 10 2010 | Dec 07 2010 | Nov 13 2015 | RNA | 1 | human placenta | Homo sapiens | tissue: placenta | gender: M | classification: Control | gestational age: 39 | induction of labor: spontaneous | batch: A | total RNA | Total RNA was isolated from term human placenta using the Totally RNA kit (Ambion) following the manufacturer’s instructions with slight modifications. Briefly, homogenized tissue chilled in liquid nitrogen was lysed in 10 volumes of denaturation solution (200 mg tissue, 2 ml denaturation solution). The lysed sample was pre-cleared of bulk genomic DNA and cellular debris by spinning at 4,000 x g for 5 minutes. The supernatant was sequentially extracted with equal volumes phenol:chloroform, and acid phenol:chloroform (pH 4.5) using phase divider gels (Sigma), then precipitated with an equal volume of 100% isopropanol. The pellet was washed twice with 70% ethanol and resuspended in elution buffer (1 mM Tris-Cl). Total RNA was treated with Turbo DNA-free to remove traces of genomic DNA contamination (Ambion). RNA integrity was assessed using a Bioanalyzer (Agilent Biotechnologies) and only samples with a RIN > 7 were used. | biotin | Labeling for Illumina Human6-v2 BeadArrays was performed according to manufacturer’s instructions. Briefly, the Illumina TotalPrep RNA Amplification Kit (Applied Biosystems, Foster City, CA) was used for a first and second strand reverse transcription step from 500 ng of total RNA. This was followed by an overnight in vitro transcription reaction that incorporates biotin-labeled nucleotides. 1.5 ug of biotin-labeled cRNA was mixed with an Illumina-supplied hybridization buffer containing several control oligonucleotides. | 9606 | Hybridization for Illumina Human6-v2 BeadArrays was performed according to manufacturer’s instructions. Labeled cRNA was hybridized to BeadArrays at 58°C for 18 hr. Washing, blocking, and streptavadin-Cy3 staining was performed out following manufacturer’s protocol. | BeadChips were scanned on the BeadArray Reader and scanned images were analyzed using BeadStudio software. | Transcript data was log2 transformed, and quantile normalized. | GPL6102 | Shengdar,,Tsai | North Carolina State University | 4700 Hillsborough St. | Raleigh | NC | 27604 | USA | NONE | 48701 | Reanalyzed by: GSE75010 | A | Control | M | 39 | spontaneous | placenta |
| GSM635954 | human.placenta.624 | GSM635954 | Public on Dec 10 2010 | Dec 07 2010 | Nov 13 2015 | RNA | 1 | human placenta | Homo sapiens | tissue: placenta | gender: M | classification: Control | gestational age: 39 | induction of labor: spontaneous | batch: A | total RNA | Total RNA was isolated from term human placenta using the Totally RNA kit (Ambion) following the manufacturer’s instructions with slight modifications. Briefly, homogenized tissue chilled in liquid nitrogen was lysed in 10 volumes of denaturation solution (200 mg tissue, 2 ml denaturation solution). The lysed sample was pre-cleared of bulk genomic DNA and cellular debris by spinning at 4,000 x g for 5 minutes. The supernatant was sequentially extracted with equal volumes phenol:chloroform, and acid phenol:chloroform (pH 4.5) using phase divider gels (Sigma), then precipitated with an equal volume of 100% isopropanol. The pellet was washed twice with 70% ethanol and resuspended in elution buffer (1 mM Tris-Cl). Total RNA was treated with Turbo DNA-free to remove traces of genomic DNA contamination (Ambion). RNA integrity was assessed using a Bioanalyzer (Agilent Biotechnologies) and only samples with a RIN > 7 were used. | biotin | Labeling for Illumina Human6-v2 BeadArrays was performed according to manufacturer’s instructions. Briefly, the Illumina TotalPrep RNA Amplification Kit (Applied Biosystems, Foster City, CA) was used for a first and second strand reverse transcription step from 500 ng of total RNA. This was followed by an overnight in vitro transcription reaction that incorporates biotin-labeled nucleotides. 1.5 ug of biotin-labeled cRNA was mixed with an Illumina-supplied hybridization buffer containing several control oligonucleotides. | 9606 | Hybridization for Illumina Human6-v2 BeadArrays was performed according to manufacturer’s instructions. Labeled cRNA was hybridized to BeadArrays at 58°C for 18 hr. Washing, blocking, and streptavadin-Cy3 staining was performed out following manufacturer’s protocol. | BeadChips were scanned on the BeadArray Reader and scanned images were analyzed using BeadStudio software. | Transcript data was log2 transformed, and quantile normalized. | GPL6102 | Shengdar,,Tsai | North Carolina State University | 4700 Hillsborough St. | Raleigh | NC | 27604 | USA | NONE | 48701 | Reanalyzed by: GSE75010 | A | Control | M | 39 | spontaneous | placenta |
| GSM635955 | human.placenta.657 | GSM635955 | Public on Dec 10 2010 | Dec 07 2010 | Nov 13 2015 | RNA | 1 | human placenta | Homo sapiens | tissue: placenta | gender: F | classification: Control | gestational age: 39 | induction of labor: spontaneous | batch: A | total RNA | Total RNA was isolated from term human placenta using the Totally RNA kit (Ambion) following the manufacturer’s instructions with slight modifications. Briefly, homogenized tissue chilled in liquid nitrogen was lysed in 10 volumes of denaturation solution (200 mg tissue, 2 ml denaturation solution). The lysed sample was pre-cleared of bulk genomic DNA and cellular debris by spinning at 4,000 x g for 5 minutes. The supernatant was sequentially extracted with equal volumes phenol:chloroform, and acid phenol:chloroform (pH 4.5) using phase divider gels (Sigma), then precipitated with an equal volume of 100% isopropanol. The pellet was washed twice with 70% ethanol and resuspended in elution buffer (1 mM Tris-Cl). Total RNA was treated with Turbo DNA-free to remove traces of genomic DNA contamination (Ambion). RNA integrity was assessed using a Bioanalyzer (Agilent Biotechnologies) and only samples with a RIN > 7 were used. | biotin | Labeling for Illumina Human6-v2 BeadArrays was performed according to manufacturer’s instructions. Briefly, the Illumina TotalPrep RNA Amplification Kit (Applied Biosystems, Foster City, CA) was used for a first and second strand reverse transcription step from 500 ng of total RNA. This was followed by an overnight in vitro transcription reaction that incorporates biotin-labeled nucleotides. 1.5 ug of biotin-labeled cRNA was mixed with an Illumina-supplied hybridization buffer containing several control oligonucleotides. | 9606 | Hybridization for Illumina Human6-v2 BeadArrays was performed according to manufacturer’s instructions. Labeled cRNA was hybridized to BeadArrays at 58°C for 18 hr. Washing, blocking, and streptavadin-Cy3 staining was performed out following manufacturer’s protocol. | BeadChips were scanned on the BeadArray Reader and scanned images were analyzed using BeadStudio software. | Transcript data was log2 transformed, and quantile normalized. | GPL6102 | Shengdar,,Tsai | North Carolina State University | 4700 Hillsborough St. | Raleigh | NC | 27604 | USA | NONE | 48701 | Reanalyzed by: GSE75010 | A | Control | F | 39 | spontaneous | placenta |
| GSM635956 | human.placenta.668 | GSM635956 | Public on Dec 10 2010 | Dec 07 2010 | Nov 13 2015 | RNA | 1 | human placenta | Homo sapiens | tissue: placenta | gender: M | classification: Control | gestational age: 37 | induction of labor: spontaneous | batch: A | total RNA | Total RNA was isolated from term human placenta using the Totally RNA kit (Ambion) following the manufacturer’s instructions with slight modifications. Briefly, homogenized tissue chilled in liquid nitrogen was lysed in 10 volumes of denaturation solution (200 mg tissue, 2 ml denaturation solution). The lysed sample was pre-cleared of bulk genomic DNA and cellular debris by spinning at 4,000 x g for 5 minutes. The supernatant was sequentially extracted with equal volumes phenol:chloroform, and acid phenol:chloroform (pH 4.5) using phase divider gels (Sigma), then precipitated with an equal volume of 100% isopropanol. The pellet was washed twice with 70% ethanol and resuspended in elution buffer (1 mM Tris-Cl). Total RNA was treated with Turbo DNA-free to remove traces of genomic DNA contamination (Ambion). RNA integrity was assessed using a Bioanalyzer (Agilent Biotechnologies) and only samples with a RIN > 7 were used. | biotin | Labeling for Illumina Human6-v2 BeadArrays was performed according to manufacturer’s instructions. Briefly, the Illumina TotalPrep RNA Amplification Kit (Applied Biosystems, Foster City, CA) was used for a first and second strand reverse transcription step from 500 ng of total RNA. This was followed by an overnight in vitro transcription reaction that incorporates biotin-labeled nucleotides. 1.5 ug of biotin-labeled cRNA was mixed with an Illumina-supplied hybridization buffer containing several control oligonucleotides. | 9606 | Hybridization for Illumina Human6-v2 BeadArrays was performed according to manufacturer’s instructions. Labeled cRNA was hybridized to BeadArrays at 58°C for 18 hr. Washing, blocking, and streptavadin-Cy3 staining was performed out following manufacturer’s protocol. | BeadChips were scanned on the BeadArray Reader and scanned images were analyzed using BeadStudio software. | Transcript data was log2 transformed, and quantile normalized. | GPL6102 | Shengdar,,Tsai | North Carolina State University | 4700 Hillsborough St. | Raleigh | NC | 27604 | USA | NONE | 48701 | Reanalyzed by: GSE75010 | A | Control | M | 37 | spontaneous | placenta |
| GSM635957 | human.placenta.695 | GSM635957 | Public on Dec 10 2010 | Dec 07 2010 | Nov 13 2015 | RNA | 1 | human placenta | Homo sapiens | tissue: placenta | gender: M | classification: preeclamptic | gestational age: 35 | induction of labor: spontaneous | batch: A | total RNA | Total RNA was isolated from term human placenta using the Totally RNA kit (Ambion) following the manufacturer’s instructions with slight modifications. Briefly, homogenized tissue chilled in liquid nitrogen was lysed in 10 volumes of denaturation solution (200 mg tissue, 2 ml denaturation solution). The lysed sample was pre-cleared of bulk genomic DNA and cellular debris by spinning at 4,000 x g for 5 minutes. The supernatant was sequentially extracted with equal volumes phenol:chloroform, and acid phenol:chloroform (pH 4.5) using phase divider gels (Sigma), then precipitated with an equal volume of 100% isopropanol. The pellet was washed twice with 70% ethanol and resuspended in elution buffer (1 mM Tris-Cl). Total RNA was treated with Turbo DNA-free to remove traces of genomic DNA contamination (Ambion). RNA integrity was assessed using a Bioanalyzer (Agilent Biotechnologies) and only samples with a RIN > 7 were used. | biotin | Labeling for Illumina Human6-v2 BeadArrays was performed according to manufacturer’s instructions. Briefly, the Illumina TotalPrep RNA Amplification Kit (Applied Biosystems, Foster City, CA) was used for a first and second strand reverse transcription step from 500 ng of total RNA. This was followed by an overnight in vitro transcription reaction that incorporates biotin-labeled nucleotides. 1.5 ug of biotin-labeled cRNA was mixed with an Illumina-supplied hybridization buffer containing several control oligonucleotides. | 9606 | Hybridization for Illumina Human6-v2 BeadArrays was performed according to manufacturer’s instructions. Labeled cRNA was hybridized to BeadArrays at 58°C for 18 hr. Washing, blocking, and streptavadin-Cy3 staining was performed out following manufacturer’s protocol. | BeadChips were scanned on the BeadArray Reader and scanned images were analyzed using BeadStudio software. | Transcript data was log2 transformed, and quantile normalized. | GPL6102 | Shengdar,,Tsai | North Carolina State University | 4700 Hillsborough St. | Raleigh | NC | 27604 | USA | NONE | 48701 | Reanalyzed by: GSE75010 | A | preeclamptic | M | 35 | spontaneous | placenta |
| GSM635958 | human.placenta.701 | GSM635958 | Public on Dec 10 2010 | Dec 07 2010 | Nov 13 2015 | RNA | 1 | human placenta | Homo sapiens | tissue: placenta | gender: F | classification: Control | gestational age: 37 | induction of labor: induced | batch: A | total RNA | Total RNA was isolated from term human placenta using the Totally RNA kit (Ambion) following the manufacturer’s instructions with slight modifications. Briefly, homogenized tissue chilled in liquid nitrogen was lysed in 10 volumes of denaturation solution (200 mg tissue, 2 ml denaturation solution). The lysed sample was pre-cleared of bulk genomic DNA and cellular debris by spinning at 4,000 x g for 5 minutes. The supernatant was sequentially extracted with equal volumes phenol:chloroform, and acid phenol:chloroform (pH 4.5) using phase divider gels (Sigma), then precipitated with an equal volume of 100% isopropanol. The pellet was washed twice with 70% ethanol and resuspended in elution buffer (1 mM Tris-Cl). Total RNA was treated with Turbo DNA-free to remove traces of genomic DNA contamination (Ambion). RNA integrity was assessed using a Bioanalyzer (Agilent Biotechnologies) and only samples with a RIN > 7 were used. | biotin | Labeling for Illumina Human6-v2 BeadArrays was performed according to manufacturer’s instructions. Briefly, the Illumina TotalPrep RNA Amplification Kit (Applied Biosystems, Foster City, CA) was used for a first and second strand reverse transcription step from 500 ng of total RNA. This was followed by an overnight in vitro transcription reaction that incorporates biotin-labeled nucleotides. 1.5 ug of biotin-labeled cRNA was mixed with an Illumina-supplied hybridization buffer containing several control oligonucleotides. | 9606 | Hybridization for Illumina Human6-v2 BeadArrays was performed according to manufacturer’s instructions. Labeled cRNA was hybridized to BeadArrays at 58°C for 18 hr. Washing, blocking, and streptavadin-Cy3 staining was performed out following manufacturer’s protocol. | BeadChips were scanned on the BeadArray Reader and scanned images were analyzed using BeadStudio software. | Transcript data was log2 transformed, and quantile normalized. | GPL6102 | Shengdar,,Tsai | North Carolina State University | 4700 Hillsborough St. | Raleigh | NC | 27604 | USA | NONE | 48701 | Reanalyzed by: GSE75010 | A | Control | F | 37 | induced | placenta |
| GSM635959 | human.placenta.705 | GSM635959 | Public on Dec 10 2010 | Dec 07 2010 | Nov 13 2015 | RNA | 1 | human placenta | Homo sapiens | tissue: placenta | gender: M | classification: Control | gestational age: 38 | induction of labor: spontaneous | batch: A | total RNA | Total RNA was isolated from term human placenta using the Totally RNA kit (Ambion) following the manufacturer’s instructions with slight modifications. Briefly, homogenized tissue chilled in liquid nitrogen was lysed in 10 volumes of denaturation solution (200 mg tissue, 2 ml denaturation solution). The lysed sample was pre-cleared of bulk genomic DNA and cellular debris by spinning at 4,000 x g for 5 minutes. The supernatant was sequentially extracted with equal volumes phenol:chloroform, and acid phenol:chloroform (pH 4.5) using phase divider gels (Sigma), then precipitated with an equal volume of 100% isopropanol. The pellet was washed twice with 70% ethanol and resuspended in elution buffer (1 mM Tris-Cl). Total RNA was treated with Turbo DNA-free to remove traces of genomic DNA contamination (Ambion). RNA integrity was assessed using a Bioanalyzer (Agilent Biotechnologies) and only samples with a RIN > 7 were used. | biotin | Labeling for Illumina Human6-v2 BeadArrays was performed according to manufacturer’s instructions. Briefly, the Illumina TotalPrep RNA Amplification Kit (Applied Biosystems, Foster City, CA) was used for a first and second strand reverse transcription step from 500 ng of total RNA. This was followed by an overnight in vitro transcription reaction that incorporates biotin-labeled nucleotides. 1.5 ug of biotin-labeled cRNA was mixed with an Illumina-supplied hybridization buffer containing several control oligonucleotides. | 9606 | Hybridization for Illumina Human6-v2 BeadArrays was performed according to manufacturer’s instructions. Labeled cRNA was hybridized to BeadArrays at 58°C for 18 hr. Washing, blocking, and streptavadin-Cy3 staining was performed out following manufacturer’s protocol. | BeadChips were scanned on the BeadArray Reader and scanned images were analyzed using BeadStudio software. | Transcript data was log2 transformed, and quantile normalized. | GPL6102 | Shengdar,,Tsai | North Carolina State University | 4700 Hillsborough St. | Raleigh | NC | 27604 | USA | NONE | 48701 | Reanalyzed by: GSE75010 | A | Control | M | 38 | spontaneous | placenta |
| GSM635960 | human.placenta.748 | GSM635960 | Public on Dec 10 2010 | Dec 07 2010 | Nov 13 2015 | RNA | 1 | human placenta | Homo sapiens | tissue: placenta | gender: M | classification: preeclamptic | gestational age: 38 | induction of labor: induced | batch: A | total RNA | Total RNA was isolated from term human placenta using the Totally RNA kit (Ambion) following the manufacturer’s instructions with slight modifications. Briefly, homogenized tissue chilled in liquid nitrogen was lysed in 10 volumes of denaturation solution (200 mg tissue, 2 ml denaturation solution). The lysed sample was pre-cleared of bulk genomic DNA and cellular debris by spinning at 4,000 x g for 5 minutes. The supernatant was sequentially extracted with equal volumes phenol:chloroform, and acid phenol:chloroform (pH 4.5) using phase divider gels (Sigma), then precipitated with an equal volume of 100% isopropanol. The pellet was washed twice with 70% ethanol and resuspended in elution buffer (1 mM Tris-Cl). Total RNA was treated with Turbo DNA-free to remove traces of genomic DNA contamination (Ambion). RNA integrity was assessed using a Bioanalyzer (Agilent Biotechnologies) and only samples with a RIN > 7 were used. | biotin | Labeling for Illumina Human6-v2 BeadArrays was performed according to manufacturer’s instructions. Briefly, the Illumina TotalPrep RNA Amplification Kit (Applied Biosystems, Foster City, CA) was used for a first and second strand reverse transcription step from 500 ng of total RNA. This was followed by an overnight in vitro transcription reaction that incorporates biotin-labeled nucleotides. 1.5 ug of biotin-labeled cRNA was mixed with an Illumina-supplied hybridization buffer containing several control oligonucleotides. | 9606 | Hybridization for Illumina Human6-v2 BeadArrays was performed according to manufacturer’s instructions. Labeled cRNA was hybridized to BeadArrays at 58°C for 18 hr. Washing, blocking, and streptavadin-Cy3 staining was performed out following manufacturer’s protocol. | BeadChips were scanned on the BeadArray Reader and scanned images were analyzed using BeadStudio software. | Transcript data was log2 transformed, and quantile normalized. | GPL6102 | Shengdar,,Tsai | North Carolina State University | 4700 Hillsborough St. | Raleigh | NC | 27604 | USA | NONE | 48701 | Reanalyzed by: GSE75010 | A | preeclamptic | M | 38 | induced | placenta |
| GSM635961 | human.placenta.777 | GSM635961 | Public on Dec 10 2010 | Dec 07 2010 | Nov 13 2015 | RNA | 1 | human placenta | Homo sapiens | tissue: placenta | gender: F | classification: Control | gestational age: 38 | induction of labor: spontaneous | batch: A | total RNA | Total RNA was isolated from term human placenta using the Totally RNA kit (Ambion) following the manufacturer’s instructions with slight modifications. Briefly, homogenized tissue chilled in liquid nitrogen was lysed in 10 volumes of denaturation solution (200 mg tissue, 2 ml denaturation solution). The lysed sample was pre-cleared of bulk genomic DNA and cellular debris by spinning at 4,000 x g for 5 minutes. The supernatant was sequentially extracted with equal volumes phenol:chloroform, and acid phenol:chloroform (pH 4.5) using phase divider gels (Sigma), then precipitated with an equal volume of 100% isopropanol. The pellet was washed twice with 70% ethanol and resuspended in elution buffer (1 mM Tris-Cl). Total RNA was treated with Turbo DNA-free to remove traces of genomic DNA contamination (Ambion). RNA integrity was assessed using a Bioanalyzer (Agilent Biotechnologies) and only samples with a RIN > 7 were used. | biotin | Labeling for Illumina Human6-v2 BeadArrays was performed according to manufacturer’s instructions. Briefly, the Illumina TotalPrep RNA Amplification Kit (Applied Biosystems, Foster City, CA) was used for a first and second strand reverse transcription step from 500 ng of total RNA. This was followed by an overnight in vitro transcription reaction that incorporates biotin-labeled nucleotides. 1.5 ug of biotin-labeled cRNA was mixed with an Illumina-supplied hybridization buffer containing several control oligonucleotides. | 9606 | Hybridization for Illumina Human6-v2 BeadArrays was performed according to manufacturer’s instructions. Labeled cRNA was hybridized to BeadArrays at 58°C for 18 hr. Washing, blocking, and streptavadin-Cy3 staining was performed out following manufacturer’s protocol. | BeadChips were scanned on the BeadArray Reader and scanned images were analyzed using BeadStudio software. | Transcript data was log2 transformed, and quantile normalized. | GPL6102 | Shengdar,,Tsai | North Carolina State University | 4700 Hillsborough St. | Raleigh | NC | 27604 | USA | NONE | 48701 | Reanalyzed by: GSE75010 | A | Control | F | 38 | spontaneous | placenta |
| GSM635962 | human.placenta.779 | GSM635962 | Public on Dec 10 2010 | Dec 07 2010 | Nov 13 2015 | RNA | 1 | human placenta | Homo sapiens | tissue: placenta | gender: F | classification: preeclamptic | gestational age: 37 | induction of labor: spontaneous | batch: A | total RNA | Total RNA was isolated from term human placenta using the Totally RNA kit (Ambion) following the manufacturer’s instructions with slight modifications. Briefly, homogenized tissue chilled in liquid nitrogen was lysed in 10 volumes of denaturation solution (200 mg tissue, 2 ml denaturation solution). The lysed sample was pre-cleared of bulk genomic DNA and cellular debris by spinning at 4,000 x g for 5 minutes. The supernatant was sequentially extracted with equal volumes phenol:chloroform, and acid phenol:chloroform (pH 4.5) using phase divider gels (Sigma), then precipitated with an equal volume of 100% isopropanol. The pellet was washed twice with 70% ethanol and resuspended in elution buffer (1 mM Tris-Cl). Total RNA was treated with Turbo DNA-free to remove traces of genomic DNA contamination (Ambion). RNA integrity was assessed using a Bioanalyzer (Agilent Biotechnologies) and only samples with a RIN > 7 were used. | biotin | Labeling for Illumina Human6-v2 BeadArrays was performed according to manufacturer’s instructions. Briefly, the Illumina TotalPrep RNA Amplification Kit (Applied Biosystems, Foster City, CA) was used for a first and second strand reverse transcription step from 500 ng of total RNA. This was followed by an overnight in vitro transcription reaction that incorporates biotin-labeled nucleotides. 1.5 ug of biotin-labeled cRNA was mixed with an Illumina-supplied hybridization buffer containing several control oligonucleotides. | 9606 | Hybridization for Illumina Human6-v2 BeadArrays was performed according to manufacturer’s instructions. Labeled cRNA was hybridized to BeadArrays at 58°C for 18 hr. Washing, blocking, and streptavadin-Cy3 staining was performed out following manufacturer’s protocol. | BeadChips were scanned on the BeadArray Reader and scanned images were analyzed using BeadStudio software. | Transcript data was log2 transformed, and quantile normalized. | GPL6102 | Shengdar,,Tsai | North Carolina State University | 4700 Hillsborough St. | Raleigh | NC | 27604 | USA | NONE | 48701 | Reanalyzed by: GSE75010 | A | preeclamptic | F | 37 | spontaneous | placenta |
| GSM635963 | human.placenta.784 | GSM635963 | Public on Dec 10 2010 | Dec 07 2010 | Nov 13 2015 | RNA | 1 | human placenta | Homo sapiens | tissue: placenta | gender: F | classification: Control | gestational age: 38 | induction of labor: spontaneous | batch: A | total RNA | Total RNA was isolated from term human placenta using the Totally RNA kit (Ambion) following the manufacturer’s instructions with slight modifications. Briefly, homogenized tissue chilled in liquid nitrogen was lysed in 10 volumes of denaturation solution (200 mg tissue, 2 ml denaturation solution). The lysed sample was pre-cleared of bulk genomic DNA and cellular debris by spinning at 4,000 x g for 5 minutes. The supernatant was sequentially extracted with equal volumes phenol:chloroform, and acid phenol:chloroform (pH 4.5) using phase divider gels (Sigma), then precipitated with an equal volume of 100% isopropanol. The pellet was washed twice with 70% ethanol and resuspended in elution buffer (1 mM Tris-Cl). Total RNA was treated with Turbo DNA-free to remove traces of genomic DNA contamination (Ambion). RNA integrity was assessed using a Bioanalyzer (Agilent Biotechnologies) and only samples with a RIN > 7 were used. | biotin | Labeling for Illumina Human6-v2 BeadArrays was performed according to manufacturer’s instructions. Briefly, the Illumina TotalPrep RNA Amplification Kit (Applied Biosystems, Foster City, CA) was used for a first and second strand reverse transcription step from 500 ng of total RNA. This was followed by an overnight in vitro transcription reaction that incorporates biotin-labeled nucleotides. 1.5 ug of biotin-labeled cRNA was mixed with an Illumina-supplied hybridization buffer containing several control oligonucleotides. | 9606 | Hybridization for Illumina Human6-v2 BeadArrays was performed according to manufacturer’s instructions. Labeled cRNA was hybridized to BeadArrays at 58°C for 18 hr. Washing, blocking, and streptavadin-Cy3 staining was performed out following manufacturer’s protocol. | BeadChips were scanned on the BeadArray Reader and scanned images were analyzed using BeadStudio software. | Transcript data was log2 transformed, and quantile normalized. | GPL6102 | Shengdar,,Tsai | North Carolina State University | 4700 Hillsborough St. | Raleigh | NC | 27604 | USA | NONE | 48701 | Reanalyzed by: GSE75010 | A | Control | F | 38 | spontaneous | placenta |

Table S3. The clinical information table of the GSE173193 dataset.

|  | title | geo_accession | status | submission_date | last_update_date | type | channel_count | source_name_ch1 | organism_ch1 | characteristics_ch1 | characteristics_ch1.1 | characteristics_ch1.2 | molecule_ch1 | extract_protocol_ch1 | extract_protocol_ch1.1 | taxid_ch1 | data_processing | data_processing.1 | data_processing.2 | platform_id | contact_name | contact_email | contact_institute | contact_address | contact_city | contact_zip/postal_code | contact_country | data_row_count | instrument_model | library_selection | library_source | library_strategy | relation | relation.1 | supplementary_file_1 | supplementary_file_2 | supplementary_file_3 | age:ch1 | disease state:ch1 | tissue:ch1 |
| --- | --- | --- | --- | --- | --- | --- | --- | --- | --- | --- | --- | --- | --- | --- | --- | --- | --- | --- | --- | --- | --- | --- | --- | --- | --- | --- | --- | --- | --- | --- | --- | --- | --- | --- | --- | --- | --- | --- | --- | --- |
| GSM5261695 | C1 | GSM5261695 | Public on May 04 2021 | Apr 23 2021 | May 05 2021 | SRA | 1 | placenta | Homo sapiens | tissue: placenta | age: 29 | disease state: control group | polyA RNA | Single cells were suspended in calcium- and magnesium-free PBS containing 0.04% weight/volume BSA. Then Cells were added to each channel. After generation of GEMs, reverse transcription reactions were engaged barcoded full-length cDNA followed by the disruption of emulsions using the recovery agent and cDNA clean up with DynaBeads Myone Silane Beads (Thermo Fisher Scientific). Subsequently, the amplified cDNA was fragmented, end-repaired, A-tailed, and index adaptor ligated and library amplification. | RNA libraries were prepared with Chromium Single cell 3’ Reagent v3 Kits according to the manufacturer’s protocol. | 9606 | The Cell Ranger software pipeline (version 3.1.0) provided by 10×Genomics was used to demultiplex cellular barcodes, map reads to the genome and transcriptome using the STAR aligner, and down-sample reads as required to generate normalized aggregate data across samples, producing a matrix of gene counts versus cells | Genome_build: GRCh38 | Supplementary_files_format_and_content: Matrix table with raw gene counts for every gene and every cell | GPL24676 | Yu,,Bin | binyu@njmu.edu.cn | Changzhou Maternal And Child Health Care Hospital | 16 Dingxiang Road, Changzhou City, Jiangsu Province | Changzhou | 213000 | China | 0 | Illumina NovaSeq 6000 | cDNA | transcriptomic | RNA-Seq | BioSample: https://www.ncbi.nlm.nih.gov/biosample/SAMN18844863 | SRA: https://www.ncbi.nlm.nih.gov/sra?term=SRX10665056 | ftp://ftp.ncbi.nlm.nih.gov/geo/samples/GSM5261nnn/GSM5261695/suppl/GSM5261695_C1_barcodes.tsv.gz | ftp://ftp.ncbi.nlm.nih.gov/geo/samples/GSM5261nnn/GSM5261695/suppl/GSM5261695_C1_features.tsv.gz | ftp://ftp.ncbi.nlm.nih.gov/geo/samples/GSM5261nnn/GSM5261695/suppl/GSM5261695_C1_matrix.mtx.gz | 29 | control group | placenta |
| GSM5261696 | C2 | GSM5261696 | Public on May 04 2021 | Apr 23 2021 | May 05 2021 | SRA | 1 | placenta | Homo sapiens | tissue: placenta | age: 28 | disease state: control group | polyA RNA | Single cells were suspended in calcium- and magnesium-free PBS containing 0.04% weight/volume BSA. Then Cells were added to each channel. After generation of GEMs, reverse transcription reactions were engaged barcoded full-length cDNA followed by the disruption of emulsions using the recovery agent and cDNA clean up with DynaBeads Myone Silane Beads (Thermo Fisher Scientific). Subsequently, the amplified cDNA was fragmented, end-repaired, A-tailed, and index adaptor ligated and library amplification. | RNA libraries were prepared with Chromium Single cell 3’ Reagent v3 Kits according to the manufacturer’s protocol. | 9606 | The Cell Ranger software pipeline (version 3.1.0) provided by 10×Genomics was used to demultiplex cellular barcodes, map reads to the genome and transcriptome using the STAR aligner, and down-sample reads as required to generate normalized aggregate data across samples, producing a matrix of gene counts versus cells | Genome_build: GRCh38 | Supplementary_files_format_and_content: Matrix table with raw gene counts for every gene and every cell | GPL24676 | Yu,,Bin | binyu@njmu.edu.cn | Changzhou Maternal And Child Health Care Hospital | 16 Dingxiang Road, Changzhou City, Jiangsu Province | Changzhou | 213000 | China | 0 | Illumina NovaSeq 6000 | cDNA | transcriptomic | RNA-Seq | BioSample: https://www.ncbi.nlm.nih.gov/biosample/SAMN18844857 | SRA: https://www.ncbi.nlm.nih.gov/sra?term=SRX10665057 | ftp://ftp.ncbi.nlm.nih.gov/geo/samples/GSM5261nnn/GSM5261696/suppl/GSM5261696_C2_barcodes.tsv.gz | ftp://ftp.ncbi.nlm.nih.gov/geo/samples/GSM5261nnn/GSM5261696/suppl/GSM5261696_C2_features.tsv.gz | ftp://ftp.ncbi.nlm.nih.gov/geo/samples/GSM5261nnn/GSM5261696/suppl/GSM5261696_C2_matrix.mtx.gz | 28 | control group | placenta |
| GSM5261697 | G1 | GSM5261697 | Public on May 04 2021 | Apr 23 2021 | May 05 2021 | SRA | 1 | placenta | Homo sapiens | tissue: placenta | age: 28 | disease state: GDM group | polyA RNA | Single cells were suspended in calcium- and magnesium-free PBS containing 0.04% weight/volume BSA. Then Cells were added to each channel. After generation of GEMs, reverse transcription reactions were engaged barcoded full-length cDNA followed by the disruption of emulsions using the recovery agent and cDNA clean up with DynaBeads Myone Silane Beads (Thermo Fisher Scientific). Subsequently, the amplified cDNA was fragmented, end-repaired, A-tailed, and index adaptor ligated and library amplification. | RNA libraries were prepared with Chromium Single cell 3’ Reagent v3 Kits according to the manufacturer’s protocol. | 9606 | The Cell Ranger software pipeline (version 3.1.0) provided by 10×Genomics was used to demultiplex cellular barcodes, map reads to the genome and transcriptome using the STAR aligner, and down-sample reads as required to generate normalized aggregate data across samples, producing a matrix of gene counts versus cells | Genome_build: GRCh38 | Supplementary_files_format_and_content: Matrix table with raw gene counts for every gene and every cell | GPL24676 | Yu,,Bin | binyu@njmu.edu.cn | Changzhou Maternal And Child Health Care Hospital | 16 Dingxiang Road, Changzhou City, Jiangsu Province | Changzhou | 213000 | China | 0 | Illumina NovaSeq 6000 | cDNA | transcriptomic | RNA-Seq | BioSample: https://www.ncbi.nlm.nih.gov/biosample/SAMN18844855 | SRA: https://www.ncbi.nlm.nih.gov/sra?term=SRX10665058 | ftp://ftp.ncbi.nlm.nih.gov/geo/samples/GSM5261nnn/GSM5261697/suppl/GSM5261697_G1_barcodes.tsv.gz | ftp://ftp.ncbi.nlm.nih.gov/geo/samples/GSM5261nnn/GSM5261697/suppl/GSM5261697_G1_features.tsv.gz | ftp://ftp.ncbi.nlm.nih.gov/geo/samples/GSM5261nnn/GSM5261697/suppl/GSM5261697_G1_matrix.mtx.gz | 28 | GDM group | placenta |
| GSM5261698 | G2 | GSM5261698 | Public on May 04 2021 | Apr 23 2021 | May 05 2021 | SRA | 1 | placenta | Homo sapiens | tissue: placenta | age: 33 | disease state: GDM group | polyA RNA | Single cells were suspended in calcium- and magnesium-free PBS containing 0.04% weight/volume BSA. Then Cells were added to each channel. After generation of GEMs, reverse transcription reactions were engaged barcoded full-length cDNA followed by the disruption of emulsions using the recovery agent and cDNA clean up with DynaBeads Myone Silane Beads (Thermo Fisher Scientific). Subsequently, the amplified cDNA was fragmented, end-repaired, A-tailed, and index adaptor ligated and library amplification. | RNA libraries were prepared with Chromium Single cell 3’ Reagent v3 Kits according to the manufacturer’s protocol. | 9606 | The Cell Ranger software pipeline (version 3.1.0) provided by 10×Genomics was used to demultiplex cellular barcodes, map reads to the genome and transcriptome using the STAR aligner, and down-sample reads as required to generate normalized aggregate data across samples, producing a matrix of gene counts versus cells | Genome_build: GRCh38 | Supplementary_files_format_and_content: Matrix table with raw gene counts for every gene and every cell | GPL24676 | Yu,,Bin | binyu@njmu.edu.cn | Changzhou Maternal And Child Health Care Hospital | 16 Dingxiang Road, Changzhou City, Jiangsu Province | Changzhou | 213000 | China | 0 | Illumina NovaSeq 6000 | cDNA | transcriptomic | RNA-Seq | BioSample: https://www.ncbi.nlm.nih.gov/biosample/SAMN18844853 | SRA: https://www.ncbi.nlm.nih.gov/sra?term=SRX10665059 | ftp://ftp.ncbi.nlm.nih.gov/geo/samples/GSM5261nnn/GSM5261698/suppl/GSM5261698_G2_barcodes.tsv.gz | ftp://ftp.ncbi.nlm.nih.gov/geo/samples/GSM5261nnn/GSM5261698/suppl/GSM5261698_G2_features.tsv.gz | ftp://ftp.ncbi.nlm.nih.gov/geo/samples/GSM5261nnn/GSM5261698/suppl/GSM5261698_G2_matrix.mtx.gz | 33 | GDM group | placenta |
| GSM5261699 | P1 | GSM5261699 | Public on May 04 2021 | Apr 23 2021 | May 05 2021 | SRA | 1 | placenta | Homo sapiens | tissue: placenta | age: 30 | disease state: PE group | polyA RNA | Single cells were suspended in calcium- and magnesium-free PBS containing 0.04% weight/volume BSA. Then Cells were added to each channel. After generation of GEMs, reverse transcription reactions were engaged barcoded full-length cDNA followed by the disruption of emulsions using the recovery agent and cDNA clean up with DynaBeads Myone Silane Beads (Thermo Fisher Scientific). Subsequently, the amplified cDNA was fragmented, end-repaired, A-tailed, and index adaptor ligated and library amplification. | RNA libraries were prepared with Chromium Single cell 3’ Reagent v3 Kits according to the manufacturer’s protocol. | 9606 | The Cell Ranger software pipeline (version 3.1.0) provided by 10×Genomics was used to demultiplex cellular barcodes, map reads to the genome and transcriptome using the STAR aligner, and down-sample reads as required to generate normalized aggregate data across samples, producing a matrix of gene counts versus cells | Genome_build: GRCh38 | Supplementary_files_format_and_content: Matrix table with raw gene counts for every gene and every cell | GPL24676 | Yu,,Bin | binyu@njmu.edu.cn | Changzhou Maternal And Child Health Care Hospital | 16 Dingxiang Road, Changzhou City, Jiangsu Province | Changzhou | 213000 | China | 0 | Illumina NovaSeq 6000 | cDNA | transcriptomic | RNA-Seq | BioSample: https://www.ncbi.nlm.nih.gov/biosample/SAMN18844851 | SRA: https://www.ncbi.nlm.nih.gov/sra?term=SRX10665060 | ftp://ftp.ncbi.nlm.nih.gov/geo/samples/GSM5261nnn/GSM5261699/suppl/GSM5261699_P1_barcodes.tsv.gz | ftp://ftp.ncbi.nlm.nih.gov/geo/samples/GSM5261nnn/GSM5261699/suppl/GSM5261699_P1_features.tsv.gz | ftp://ftp.ncbi.nlm.nih.gov/geo/samples/GSM5261nnn/GSM5261699/suppl/GSM5261699_P1_matrix.mtx.gz | 30 | PE group | placenta |
| GSM5261700 | P2 | GSM5261700 | Public on May 04 2021 | Apr 23 2021 | May 05 2021 | SRA | 1 | placenta | Homo sapiens | tissue: placenta | age: 34 | disease state: PE group | polyA RNA | Single cells were suspended in calcium- and magnesium-free PBS containing 0.04% weight/volume BSA. Then Cells were added to each channel. After generation of GEMs, reverse transcription reactions were engaged barcoded full-length cDNA followed by the disruption of emulsions using the recovery agent and cDNA clean up with DynaBeads Myone Silane Beads (Thermo Fisher Scientific). Subsequently, the amplified cDNA was fragmented, end-repaired, A-tailed, and index adaptor ligated and library amplification. | RNA libraries were prepared with Chromium Single cell 3’ Reagent v3 Kits according to the manufacturer’s protocol. | 9606 | The Cell Ranger software pipeline (version 3.1.0) provided by 10×Genomics was used to demultiplex cellular barcodes, map reads to the genome and transcriptome using the STAR aligner, and down-sample reads as required to generate normalized aggregate data across samples, producing a matrix of gene counts versus cells | Genome_build: GRCh38 | Supplementary_files_format_and_content: Matrix table with raw gene counts for every gene and every cell | GPL24676 | Yu,,Bin | binyu@njmu.edu.cn | Changzhou Maternal And Child Health Care Hospital | 16 Dingxiang Road, Changzhou City, Jiangsu Province | Changzhou | 213000 | China | 0 | Illumina NovaSeq 6000 | cDNA | transcriptomic | RNA-Seq | BioSample: https://www.ncbi.nlm.nih.gov/biosample/SAMN18844849 | SRA: https://www.ncbi.nlm.nih.gov/sra?term=SRX10665061 | ftp://ftp.ncbi.nlm.nih.gov/geo/samples/GSM5261nnn/GSM5261700/suppl/GSM5261700_P2_barcodes.tsv.gz | ftp://ftp.ncbi.nlm.nih.gov/geo/samples/GSM5261nnn/GSM5261700/suppl/GSM5261700_P2_features.tsv.gz | ftp://ftp.ncbi.nlm.nih.gov/geo/samples/GSM5261nnn/GSM5261700/suppl/GSM5261700_P2_matrix.mtx.gz | 34 | PE group | placenta |
| GSM5261701 | GL1 | GSM5261701 | Public on May 04 2021 | Apr 23 2021 | May 05 2021 | SRA | 1 | placenta | Homo sapiens | tissue: placenta | age: 39 | disease state: elderly group | polyA RNA | Single cells were suspended in calcium- and magnesium-free PBS containing 0.04% weight/volume BSA. Then Cells were added to each channel. After generation of GEMs, reverse transcription reactions were engaged barcoded full-length cDNA followed by the disruption of emulsions using the recovery agent and cDNA clean up with DynaBeads Myone Silane Beads (Thermo Fisher Scientific). Subsequently, the amplified cDNA was fragmented, end-repaired, A-tailed, and index adaptor ligated and library amplification. | RNA libraries were prepared with Chromium Single cell 3’ Reagent v3 Kits according to the manufacturer’s protocol. | 9606 | The Cell Ranger software pipeline (version 3.1.0) provided by 10×Genomics was used to demultiplex cellular barcodes, map reads to the genome and transcriptome using the STAR aligner, and down-sample reads as required to generate normalized aggregate data across samples, producing a matrix of gene counts versus cells | Genome_build: GRCh38 | Supplementary_files_format_and_content: Matrix table with raw gene counts for every gene and every cell | GPL24676 | Yu,,Bin | binyu@njmu.edu.cn | Changzhou Maternal And Child Health Care Hospital | 16 Dingxiang Road, Changzhou City, Jiangsu Province | Changzhou | 213000 | China | 0 | Illumina NovaSeq 6000 | cDNA | transcriptomic | RNA-Seq | BioSample: https://www.ncbi.nlm.nih.gov/biosample/SAMN18844847 | SRA: https://www.ncbi.nlm.nih.gov/sra?term=SRX10665062 | ftp://ftp.ncbi.nlm.nih.gov/geo/samples/GSM5261nnn/GSM5261701/suppl/GSM5261701_GL1_barcodes.tsv.gz | ftp://ftp.ncbi.nlm.nih.gov/geo/samples/GSM5261nnn/GSM5261701/suppl/GSM5261701_GL1_features.tsv.gz | ftp://ftp.ncbi.nlm.nih.gov/geo/samples/GSM5261nnn/GSM5261701/suppl/GSM5261701_GL1_matrix.mtx.gz | 39 | elderly group | placenta |
| GSM5261702 | GL2 | GSM5261702 | Public on May 04 2021 | Apr 23 2021 | May 05 2021 | SRA | 1 | placenta | Homo sapiens | tissue: placenta | age: 38 | disease state: elderly group | polyA RNA | Single cells were suspended in calcium- and magnesium-free PBS containing 0.04% weight/volume BSA. Then Cells were added to each channel. After generation of GEMs, reverse transcription reactions were engaged barcoded full-length cDNA followed by the disruption of emulsions using the recovery agent and cDNA clean up with DynaBeads Myone Silane Beads (Thermo Fisher Scientific). Subsequently, the amplified cDNA was fragmented, end-repaired, A-tailed, and index adaptor ligated and library amplification. | RNA libraries were prepared with Chromium Single cell 3’ Reagent v3 Kits according to the manufacturer’s protocol. | 9606 | The Cell Ranger software pipeline (version 3.1.0) provided by 10×Genomics was used to demultiplex cellular barcodes, map reads to the genome and transcriptome using the STAR aligner, and down-sample reads as required to generate normalized aggregate data across samples, producing a matrix of gene counts versus cells | Genome_build: GRCh38 | Supplementary_files_format_and_content: Matrix table with raw gene counts for every gene and every cell | GPL24676 | Yu,,Bin | binyu@njmu.edu.cn | Changzhou Maternal And Child Health Care Hospital | 16 Dingxiang Road, Changzhou City, Jiangsu Province | Changzhou | 213000 | China | 0 | Illumina NovaSeq 6000 | cDNA | transcriptomic | RNA-Seq | BioSample: https://www.ncbi.nlm.nih.gov/biosample/SAMN18844846 | SRA: https://www.ncbi.nlm.nih.gov/sra?term=SRX10665063 | ftp://ftp.ncbi.nlm.nih.gov/geo/samples/GSM5261nnn/GSM5261702/suppl/GSM5261702_GL2_barcodes.tsv.gz | ftp://ftp.ncbi.nlm.nih.gov/geo/samples/GSM5261nnn/GSM5261702/suppl/GSM5261702_GL2_features.tsv.gz | ftp://ftp.ncbi.nlm.nih.gov/geo/samples/GSM5261nnn/GSM5261702/suppl/GSM5261702_GL2_matrix.mtx.gz | 38 | elderly group | placenta |
